# Supplementary material for: Multiplatform biomarker identification using a data-driven approach enables single-sample classification
Source: BMC Bioinformatics. 2019 Nov 21;20:601. doi: 10.1186/s12859-019-3140-7 (PMC6868758; doi:10.1186/s12859-019-3140-7)
Supplement: Supplementary file 3 — Additional file 3 The table contains reference genes and DEGs identified by DDR in TCGA-LUAD RNA-Seq data. [file 12859_2019_3140_MOESM3_ESM.xlsx]

## Sheet: LUAD_reference
ENSG00000153975.8	ZUP1
ENSG00000131013.3	PPIL4
ENSG00000029363.14	BCLAF1
ENSG00000170348.7	TMED10
ENSG00000137154.11	RPS6

## Sheet: LUAD_DDR (FDR <0.1)
Genes	adjusted p-value	ED	p-value
ENSG00000204305.12	4.15463e-89	-7.88814	7.16983e-94
ENSG00000105974.10	1.62258e-74	-5.722	5.6003e-79
ENSG00000066405.11	4.92185e-71	-5.83326	2.54816e-75
ENSG00000135604.9	2.13721e-63	-1.6167	1.47531e-67
ENSG00000261371.4	1.29821e-62	-2.83349	1.12019e-66
ENSG00000150625.15	4.25384e-61	-1.90268	4.40462e-65
ENSG00000213853.8	8.49481e-61	-5.30746	1.02619e-64
ENSG00000168309.15	1.29621e-59	-2.6293	1.78954e-63
ENSG00000107742.11	1.56659e-58	-2.90204	2.58968e-62
ENSG00000112782.14	1.56659e-58	-2.75863	2.70353e-62
ENSG00000114854.6	5.84228e-58	-1.81248	1.10905e-61
ENSG00000182010.9	2.85607e-57	-2.52229	5.91463e-61
ENSG00000022267.15	3.07773e-57	-2.29989	6.9048e-61
ENSG00000094963.12	6.67286e-57	-2.0742	1.61219e-60
ENSG00000170323.7	1.02163e-56	-2.38948	2.6446e-60
ENSG00000169252.5	8.16982e-56	-1.57843	2.25584e-59
ENSG00000078081.6	8.87771e-56	-2.76173	2.75772e-59
ENSG00000168497.4	8.87771e-56	-2.11297	2.7554e-59
ENSG00000158764.6	1.28307e-55	-1.49764	4.20707e-59
ENSG00000108576.8	1.5312e-54	-2.48294	5.28491e-58
ENSG00000031081.9	1.79279e-54	-1.34728	6.49718e-58
ENSG00000163815.5	2.06154e-54	-2.02785	7.82693e-58
ENSG00000168481.7	2.51033e-54	-2.08814	9.96402e-58
ENSG00000180440.3	7.73864e-54	-1.08861	3.20518e-57
ENSG00000136160.13	4.84586e-53	-1.96297	2.09068e-56
ENSG00000138821.11	1.66451e-52	-1.85823	7.46856e-56
ENSG00000196616.11	2.4499e-52	-2.63662	1.14153e-55
ENSG00000244734.2	2.51345e-52	-3.7489	1.21452e-55
ENSG00000243566.5	2.89781e-52	-2.43026	1.45026e-55
ENSG00000110799.12	3.75625e-52	-3.73103	2.00952e-55
ENSG00000120156.19	3.75625e-52	-1.73749	2.00844e-55
ENSG00000241644.2	3.76543e-52	-2.26783	2.07941e-55
ENSG00000171885.12	1.07723e-51	-2.52489	6.1348e-55
ENSG00000134115.11	2.23942e-50	-0.945794	1.31399e-53
ENSG00000167588.11	2.36233e-50	-1.8172	1.42687e-53
ENSG00000159307.17	3.86508e-50	-1.5151	2.40125e-53
ENSG00000268388.4	5.10214e-50	-1.71687	3.25784e-53
ENSG00000134917.9	5.13356e-50	-1.61955	3.38156e-53
ENSG00000151718.14	5.13356e-50	-1.26216	3.45509e-53
ENSG00000177469.12	1.04661e-49	-2.37722	7.2247e-53
ENSG00000168952.14	1.40031e-49	-1.62116	9.90796e-53
ENSG00000131471.5	2.12879e-49	-1.77589	1.54297e-52
ENSG00000121691.4	2.44298e-49	-1.36395	1.81286e-52
ENSG00000167434.8	2.63458e-49	-1.6128	2.00051e-52
ENSG00000102760.12	2.73863e-49	-1.65912	2.17404e-52
ENSG00000105971.13	2.73863e-49	-1.72397	2.14439e-52
ENSG00000211445.10	3.59448e-49	-3.55181	2.91548e-52
ENSG00000011201.9	5.28277e-49	-1.79179	4.37602e-52
ENSG00000277494.1	5.50274e-49	-1.63399	4.65319e-52
ENSG00000183010.15	5.68556e-49	1.90036	4.90591e-52
ENSG00000148677.6	1.22716e-48	-1.80497	1.08006e-51
__alignment_not_unique	1.64106e-48	-5	1.55762e-51
__ambiguous	1.64106e-48	-5	1.55762e-51
__no_feature	1.64106e-48	-5	1.55762e-51
ENSG00000263155.4	1.64106e-48	-0.998384	1.54075e-51
ENSG00000170989.8	4.72275e-48	-1.49143	4.56414e-51
ENSG00000117724.11	5.05543e-48	1.69469	4.9729e-51
ENSG00000165197.4	7.64627e-48	-1.64771	7.65339e-51
ENSG00000137154.11	7.79397e-48	-4.94019	7.93574e-51
ENSG00000183019.6	1.24019e-47	-2.16531	1.28415e-50
ENSG00000176771.14	2.07259e-47	-1.67787	2.18182e-50
ENSG00000076382.15	4.83497e-47	1.45595	5.17324e-50
ENSG00000135218.16	5.44312e-47	-1.84809	5.91787e-50
ENSG00000142748.11	1.30625e-46	-2.38378	1.44272e-49
ENSG00000131747.13	1.86867e-46	1.90648	2.09615e-49
ENSG00000111052.6	1.99788e-46	-1.13075	2.27556e-49
ENSG00000123119.10	2.42171e-46	-1.17586	2.8001e-49
ENSG00000115361.6	4.01382e-46	-1.2798	4.71024e-49
ENSG00000238018.2	6.79073e-46	-0.777919	8.08616e-49
ENSG00000134057.13	7.11135e-46	1.51101	8.59066e-49
ENSG00000138160.5	7.62902e-46	1.33819	9.34767e-49
ENSG00000128059.7	8.21238e-46	1.1489	1.02058e-48
ENSG00000266524.2	8.21238e-46	-1.28167	1.03459e-48
ENSG00000137804.11	9.56113e-46	1.35625	1.22101e-48
ENSG00000131477.9	9.66851e-46	-1.48814	1.2514e-48
ENSG00000180198.14	1.84275e-45	1.05183	2.41688e-48
ENSG00000139567.11	2.86658e-45	-1.32634	3.80918e-48
ENSG00000154342.5	3.306e-45	-0.874006	4.45015e-48
ENSG00000154175.15	3.92288e-45	-1.54041	5.34821e-48
ENSG00000166292.10	4.69163e-45	-2.13265	6.47724e-48
ENSG00000106462.9	5.34607e-45	1.20548	7.47302e-48
ENSG00000166482.10	5.66815e-45	-2.10369	8.02106e-48
ENSG00000103994.15	5.99074e-45	-0.936322	8.58094e-48
ENSG00000198873.11	6.30577e-45	-1.47759	9.141e-48
ENSG00000019169.10	7.28284e-45	-2.35264	1.06831e-47
ENSG00000198901.12	7.28901e-45	1.35574	1.08179e-47
ENSG00000165810.15	7.42502e-45	-1.64261	1.11479e-47
ENSG00000154721.13	8.16135e-45	-1.2932	1.23943e-47
ENSG00000111897.6	8.52273e-45	-0.890575	1.30902e-47
ENSG00000088325.14	9.1342e-45	1.68709	1.4187e-47
ENSG00000105227.13	1.21839e-44	-1.81514	1.91339e-47
ENSG00000169744.11	1.53015e-44	-1.41026	2.42939e-47
ENSG00000150048.9	1.63208e-44	-0.829019	2.6194e-47
ENSG00000179776.16	2.11251e-44	-1.48975	3.42692e-47
ENSG00000125810.9	2.15515e-44	-1.53268	3.53327e-47
ENSG00000183856.9	2.66088e-44	1.43364	4.40831e-47
ENSG00000156508.16	2.75314e-44	-5.00561	4.60869e-47
ENSG00000133800.7	4.58878e-44	-1.58093	7.76068e-47
ENSG00000122679.7	7.82125e-44	-1.61039	1.33625e-46
ENSG00000257894.2	8.63888e-44	-0.793125	1.49085e-46
ENSG00000135052.15	1.23584e-43	1.32774	2.15407e-46
ENSG00000152583.11	2.06958e-43	-1.93553	3.64299e-46
ENSG00000133661.14	2.33057e-43	-3.72473	4.14262e-46
ENSG00000064989.11	2.38045e-43	-1.51963	4.27238e-46
ENSG00000173517.9	2.82017e-43	-0.977919	5.11024e-46
ENSG00000175832.11	4.998e-43	1.66903	9.14278e-46
ENSG00000128849.10	6.71438e-43	-1.29244	1.24042e-45
ENSG00000158246.7	6.71438e-43	-1.42401	1.25143e-45
ENSG00000141338.12	8.28193e-43	-1.49308	1.55788e-45
ENSG00000249751.3	1.13873e-42	-0.830889	2.16167e-45
ENSG00000159708.16	1.87237e-42	-1.1386	3.58668e-45
ENSG00000072163.17	2.06505e-42	-1.47058	3.9914e-45
ENSG00000118526.6	2.1324e-42	-1.53892	4.15838e-45
ENSG00000186994.10	2.19486e-42	-1.24242	4.31806e-45
ENSG00000159147.16	2.28e-42	1.00722	4.5249e-45
ENSG00000079308.15	3.60273e-42	-4.13075	7.21217e-45
ENSG00000169418.9	4.44896e-42	-1.46669	8.98298e-45
ENSG00000010319.5	4.5562e-42	-1.50841	9.27815e-45
ENSG00000155511.16	4.76735e-42	-1.0288	9.7904e-45
ENSG00000179913.9	4.83523e-42	1.63726	1.00133e-44
ENSG00000188536.11	4.99445e-42	-1.98172	1.04292e-44
ENSG00000162367.10	5.23722e-42	-0.893078	1.10265e-44
ENSG00000164932.11	5.5359e-42	1.79113	1.17509e-44
ENSG00000137857.16	6.13983e-42	-1.84451	1.31388e-44
ENSG00000173391.7	7.71545e-42	-1.65234	1.66436e-44
ENSG00000164855.14	7.86984e-42	1.57643	1.71125e-44
ENSG00000011426.9	9.19327e-42	1.62778	2.01489e-44
ENSG00000163513.16	1.14523e-41	-1.17234	2.52976e-44
ENSG00000128268.11	1.50704e-41	-1.65072	3.35498e-44
ENSG00000171848.12	1.5771e-41	1.61156	3.53817e-44
ENSG00000173706.11	1.61218e-41	-1.43583	3.6447e-44
ENSG00000147689.15	2.04014e-41	2.18866	4.6474e-44
ENSG00000127329.13	2.11338e-41	-1.51104	4.85072e-44
ENSG00000131097.5	2.50919e-41	-0.908284	5.80249e-44
ENSG00000164466.11	2.51581e-41	0.91763	5.86123e-44
ENSG00000227051.5	2.59052e-41	-1.44701	6.07998e-44
ENSG00000164035.8	2.60965e-41	-1.45908	6.16991e-44
ENSG00000267107.5	4.04183e-41	-1.15207	9.62573e-44
ENSG00000103241.6	4.34292e-41	-1.33879	1.04557e-43
ENSG00000138669.8	4.34292e-41	-0.778045	1.04927e-43
ENSG00000122952.15	4.69861e-41	1.35413	1.14331e-43
ENSG00000166025.16	5.13801e-41	-1.09929	1.2591e-43
ENSG00000145147.18	6.31685e-41	-1.4083	1.55888e-43
ENSG00000116016.12	7.22854e-41	-5.22937	1.79634e-43
ENSG00000132622.9	8.20611e-41	-1.28655	2.05344e-43
ENSG00000179820.14	9.43428e-41	-2.05902	2.37705e-43
ENSG00000135917.12	1.26831e-40	-1.2798	3.21751e-43
ENSG00000113569.14	1.57133e-40	0.935942	4.0208e-43
ENSG00000205213.12	1.57133e-40	1.31006	4.04044e-43
ENSG00000133116.7	1.75286e-40	-0.929352	4.53747e-43
ENSG00000101307.14	2.28302e-40	-1.32742	5.9571e-43
ENSG00000105339.9	2.28302e-40	-1.00434	5.98867e-43
ENSG00000154133.13	2.39602e-40	-1.51696	6.32644e-43
ENSG00000189129.12	2.6915e-40	-1.10844	7.15305e-43
ENSG00000171992.11	4.02245e-40	-1.21641	1.07597e-42
ENSG00000233038.4	4.3971e-40	-0.821416	1.18377e-42
ENSG00000101331.14	4.61833e-40	-0.883732	1.2513e-42
ENSG00000126759.11	4.75527e-40	-0.88785	1.29877e-42
ENSG00000156076.8	4.75527e-40	-2.20434	1.30481e-42
ENSG00000183607.8	5.07465e-40	-1.66542	1.40121e-42
ENSG00000178726.6	6.04738e-40	-1.43403	1.68023e-42
ENSG00000133121.19	8.48305e-40	-1.09134	2.37161e-42
ENSG00000043591.5	1.28927e-39	-1.26124	3.62667e-42
ENSG00000104738.15	1.32647e-39	1.20672	3.75419e-42
ENSG00000164934.12	1.38925e-39	0.94703	3.95586e-42
ENSG00000069702.9	1.65218e-39	-1.42832	4.73305e-42
ENSG00000167972.12	1.69236e-39	-4.37659	4.87738e-42
ENSG00000047648.20	2.13285e-39	-1.00114	6.18366e-42
ENSG00000171056.7	2.29528e-39	-1.22373	6.69422e-42
ENSG00000007402.10	3.05165e-39	-2.15932	8.95282e-42
ENSG00000090006.16	3.94962e-39	-1.62915	1.16554e-41
ENSG00000161649.11	4.04584e-39	-0.911643	1.20092e-41
ENSG00000117394.18	4.64629e-39	1.6319	1.38717e-41
ENSG00000160688.17	5.15896e-39	0.960367	1.54913e-41
ENSG00000260908.1	7.00961e-39	-0.875875	2.11694e-41
ENSG00000166265.10	8.23453e-39	-1.24112	2.50108e-41
ENSG00000029993.13	1.05437e-38	1.7004	3.22064e-41
ENSG00000166123.12	1.21054e-38	1.56182	3.71856e-41
ENSG00000095713.12	1.44627e-38	-1.8907	4.46766e-41
ENSG00000138593.7	1.63893e-38	-1.03266	5.09107e-41
ENSG00000147526.18	2.41947e-38	-1.26089	7.55746e-41
ENSG00000196549.9	3.44496e-38	-1.70423	1.08201e-40
ENSG00000164741.13	3.46514e-38	-1.62712	1.09433e-40
ENSG00000107242.16	3.83368e-38	-1.35723	1.21734e-40
ENSG00000184445.10	3.91155e-38	1.17329	1.25556e-40
ENSG00000206384.9	3.91155e-38	-1.40434	1.25468e-40
ENSG00000116194.11	4.37935e-38	-0.785902	1.41328e-40
ENSG00000162849.14	4.68183e-38	1.50702	1.51897e-40
ENSG00000105538.7	4.83743e-38	-1.21381	1.5778e-40
ENSG00000120279.6	6.41792e-38	-1.20893	2.10438e-40
ENSG00000114790.11	8.01164e-38	-1.41362	2.64077e-40
ENSG00000163918.9	8.22643e-38	1.06105	2.72577e-40
ENSG00000171115.3	9.06626e-38	-1.23703	3.01969e-40
ENSG00000112214.9	9.42165e-38	-0.787645	3.15432e-40
ENSG00000165312.6	1.03446e-37	-1.02332	3.48913e-40
ENSG00000224397.4	1.03446e-37	-1.3757	3.49902e-40
ENSG00000070778.11	1.22703e-37	-1.24004	4.19273e-40
ENSG00000129596.4	1.22703e-37	-0.704514	4.18049e-40
ENSG00000171509.14	1.36889e-37	-0.676224	4.70109e-40
ENSG00000172159.14	1.48868e-37	-0.929352	5.13817e-40
ENSG00000177098.7	1.55618e-37	-1.30375	5.39801e-40
ENSG00000145247.10	1.55697e-37	1.20944	5.42761e-40
ENSG00000112902.10	1.82431e-37	-1.52232	6.39103e-40
ENSG00000144554.9	3.22393e-37	0.937431	1.13499e-39
ENSG00000067082.13	4.10174e-37	-1.91411	1.4511e-39
ENSG00000117399.12	4.12106e-37	1.4223	1.46505e-39
ENSG00000143217.8	4.19388e-37	1.18232	1.49818e-39
ENSG00000133401.14	4.91768e-37	-1.47546	1.76523e-39
ENSG00000095370.18	4.93322e-37	-1.1943	1.77932e-39
ENSG00000071967.10	5.22168e-37	-1.3297	1.89237e-39
ENSG00000038945.13	5.51014e-37	-1.43966	2.00642e-39
ENSG00000134256.11	6.02065e-37	-1.05934	2.20453e-39
ENSG00000182575.7	6.02065e-37	-0.780041	2.21309e-39
ENSG00000197415.10	6.21872e-37	-1.5553	2.29663e-39
ENSG00000129250.10	7.39433e-37	-0.989989	2.74355e-39
ENSG00000006625.16	7.40204e-37	0.936449	2.75919e-39
ENSG00000187116.12	8.55114e-37	-0.867163	3.20229e-39
ENSG00000166851.13	9.16186e-37	1.25969	3.44681e-39
ENSG00000184347.13	1.08725e-36	-1.52945	4.10913e-39
ENSG00000134020.7	1.22819e-36	-1.8453	4.66299e-39
ENSG00000118777.9	1.36445e-36	-0.959892	5.20387e-39
ENSG00000114812.11	1.40336e-36	-1.65253	5.37649e-39
ENSG00000173114.11	1.78652e-36	-0.780168	6.87527e-39
ENSG00000161835.9	1.81286e-36	-1.22987	7.00792e-39
ENSG00000101311.14	1.83955e-36	1.31738	7.14282e-39
ENSG00000229619.3	1.8639e-36	-0.752004	7.26955e-39
ENSG00000164161.8	2.1419e-36	-1.88966	8.39075e-39
ENSG00000111206.11	3.0416e-36	1.41283	1.20203e-38
ENSG00000160957.11	3.0416e-36	1.24473	1.20106e-38
ENSG00000164764.10	3.35318e-36	-0.929352	1.33266e-38
ENSG00000198844.9	3.35318e-36	-1.23463	1.33674e-38
ENSG00000175084.10	3.47317e-36	-1.66333	1.39056e-38
ENSG00000168907.12	4.2679e-36	-1.57013	1.71612e-38
ENSG00000260314.2	4.28556e-36	-1.87413	1.73061e-38
ENSG00000176435.6	4.9119e-36	-1.22797	1.99202e-38
ENSG00000148488.14	4.9622e-36	-0.632853	2.02099e-38
ENSG00000164941.12	5.17262e-36	0.874386	2.11561e-38
ENSG00000135063.16	5.62025e-36	-1.45709	2.30839e-38
ENSG00000127241.15	6.28312e-36	-0.902677	2.59149e-38
ENSG00000092421.15	7.00467e-36	-1.31424	2.92536e-38
ENSG00000115368.8	7.00467e-36	0.818058	2.91376e-38
ENSG00000165495.14	7.00467e-36	-0.920006	2.92344e-38
ENSG00000101057.14	7.07469e-36	1.62405	2.96681e-38
ENSG00000109586.10	7.59898e-36	1.02477	3.21171e-38
ENSG00000243364.6	7.59898e-36	1.10604	3.21291e-38
ENSG00000035141.6	7.82431e-36	0.860922	3.32168e-38
ENSG00000162063.11	8.10316e-36	1.06266	3.45404e-38
ENSG00000101335.8	8.39259e-36	-1.21407	3.5919e-38
ENSG00000182004.11	9.56376e-36	0.860668	4.10965e-38
ENSG00000250899.3	1.15273e-35	-0.657405	4.97331e-38
ENSG00000134201.9	1.33342e-35	-0.88199	5.77585e-38
ENSG00000140525.16	1.79665e-35	1.0281	7.81341e-38
ENSG00000104967.6	1.82713e-35	-0.972723	7.9775e-38
ENSG00000004776.10	1.91064e-35	-1.28706	8.37508e-38
ENSG00000278259.3	1.91239e-35	0.908284	8.41575e-38
ENSG00000080618.12	2.0096e-35	-1.33128	8.87822e-38
ENSG00000167850.3	2.0649e-35	-0.831269	9.15818e-38
ENSG00000183287.12	2.21977e-35	-1.18872	9.88336e-38
ENSG00000240583.9	2.30801e-35	-4.46137	1.03161e-37
ENSG00000173457.9	2.37316e-35	1.1348	1.06892e-37
ENSG00000187741.13	2.37316e-35	1.00174	1.06757e-37
ENSG00000149021.5	3.46936e-35	-4.53705	1.56874e-37
ENSG00000160949.15	3.46936e-35	1.14278	1.57464e-37
ENSG00000141934.8	3.63154e-35	1.41635	1.65451e-37
ENSG00000157554.17	3.65119e-35	-1.12973	1.66977e-37
ENSG00000184113.9	3.65563e-35	-1.47572	1.67811e-37
ENSG00000089685.13	5.5498e-35	1.47999	2.5572e-37
ENSG00000164611.11	7.56493e-35	1.19775	3.49878e-37
ENSG00000142973.11	7.71002e-35	-2.59791	3.57919e-37
ENSG00000198948.10	9.28648e-35	-0.869159	4.32705e-37
ENSG00000092964.15	1.27717e-34	-1.14852	5.97304e-37
ENSG00000123500.8	1.28761e-34	1.63688	6.04407e-37
ENSG00000168484.11	1.29436e-34	-7.52523	6.09811e-37
ENSG00000137648.15	1.34047e-34	2.03437	6.33846e-37
ENSG00000131831.16	1.40096e-34	-1.16084	6.64869e-37
ENSG00000160867.13	1.51059e-34	-1.42183	7.19504e-37
ENSG00000165072.9	1.62644e-34	-1.40336	7.77487e-37
ENSG00000198648.9	1.92366e-34	0.933819	9.22891e-37
ENSG00000118785.12	2.01723e-34	2.32026	9.71261e-37
ENSG00000227036.5	2.19113e-34	1.21844	1.05877e-36
ENSG00000225329.2	2.412e-34	-1.17912	1.16966e-36
ENSG00000257542.4	2.44905e-34	-0.742531	1.19185e-36
ENSG00000276850.3	2.84566e-34	-0.695295	1.38978e-36
ENSG00000138018.16	3.0843e-34	0.881356	1.51165e-36
ENSG00000185432.11	3.33727e-34	-1.19629	1.64139e-36
ENSG00000166961.13	3.45993e-34	-1.61983	1.70769e-36
ENSG00000111863.11	3.79827e-34	-0.944939	1.88124e-36
ENSG00000154764.5	3.84624e-34	-0.761856	1.91164e-36
ENSG00000259417.2	3.85214e-34	-0.697038	1.92122e-36
ENSG00000091106.17	5.00595e-34	-0.835387	2.50531e-36
ENSG00000155659.13	5.23102e-34	-1.45123	2.62697e-36
ENSG00000170890.12	5.23938e-34	-0.863932	2.64022e-36
ENSG00000197256.9	5.41074e-34	-1.06022	2.7359e-36
ENSG00000171243.7	5.89917e-34	-1.22322	2.99305e-36
ENSG00000140092.13	6.05565e-34	-1.18416	3.0829e-36
ENSG00000276644.3	6.96005e-34	-0.897576	3.55534e-36
ENSG00000143167.10	8.72121e-34	-0.851703	4.47002e-36
ENSG00000125459.13	8.92654e-34	0.952511	4.59067e-36
ENSG00000136546.12	9.97184e-34	-1.42968	5.14545e-36
ENSG00000239672.6	1.00773e-33	1.13534	5.21727e-36
ENSG00000183048.10	1.09006e-33	1.07264	5.66231e-36
ENSG00000113460.11	1.11007e-33	0.865421	5.7854e-36
ENSG00000152580.8	1.16837e-33	-1.32831	6.11282e-36
ENSG00000237649.6	1.16837e-33	1.21483	6.12957e-36
ENSG00000144843.10	1.16955e-33	-0.945161	6.15597e-36
ENSG00000085552.15	1.22497e-33	1.27626	6.46882e-36
ENSG00000114654.7	1.38357e-33	-1.0485	7.33022e-36
ENSG00000148773.11	1.43941e-33	1.50448	7.65088e-36
ENSG00000261236.4	1.70643e-33	0.990527	9.0996e-36
ENSG00000099994.10	1.75251e-33	-2.42848	9.37559e-36
ENSG00000188001.8	1.77184e-33	-0.745034	9.50957e-36
ENSG00000188906.12	2.09743e-33	-1.93518	1.12932e-35
ENSG00000106034.16	2.23785e-33	-1.14602	1.20879e-35
ENSG00000087586.16	2.25436e-33	1.18292	1.2216e-35
ENSG00000075624.12	2.44066e-33	-5.03178	1.32676e-35
ENSG00000107738.18	2.54988e-33	-0.961223	1.39054e-35
ENSG00000142273.9	2.55852e-33	1.11589	1.39966e-35
ENSG00000136114.14	2.56523e-33	-0.963377	1.40777e-35
ENSG00000170312.14	2.73711e-33	1.3125	1.50681e-35
ENSG00000173376.12	2.9445e-33	-1.46507	1.62606e-35
ENSG00000171049.8	3.40978e-33	-0.974212	1.8889e-35
ENSG00000025423.10	3.47096e-33	-1.59569	1.92877e-35
ENSG00000168411.12	5.09365e-33	0.794012	2.83928e-35
ENSG00000096088.15	5.17081e-33	-2.67245	2.89121e-35
ENSG00000176920.11	5.57637e-33	1.15314	3.1276e-35
ENSG00000130307.10	5.60683e-33	-0.738666	3.15436e-35
ENSG00000138772.11	5.71461e-33	-1.18704	3.22486e-35
ENSG00000112137.15	5.82046e-33	-1.13258	3.29464e-35
ENSG00000130052.12	6.21967e-33	-1.09754	3.53134e-35
ENSG00000064042.16	6.32688e-33	-1.11411	3.60313e-35
ENSG00000004799.7	9.83779e-33	-1.57858	5.61956e-35
ENSG00000144218.17	1.04437e-32	-1.27597	5.98369e-35
ENSG00000175445.13	1.08741e-32	-1.6511	6.24905e-35
ENSG00000149554.11	1.10606e-32	0.983178	6.37531e-35
ENSG00000115761.14	1.21822e-32	0.790654	7.04285e-35
ENSG00000130164.10	1.25657e-32	-1.46203	7.28622e-35
ENSG00000173898.10	1.26354e-32	1.28142	7.34846e-35
ENSG00000198075.8	1.43065e-32	-0.674481	8.34503e-35
ENSG00000113070.7	1.45755e-32	-1.40656	8.52704e-35
ENSG00000117069.13	1.5422e-32	-1.20244	9.0489e-35
ENSG00000076003.4	1.84744e-32	0.904293	1.08718e-34
ENSG00000147257.12	1.88492e-32	-1.51323	1.11249e-34
ENSG00000076067.10	2.30822e-32	-0.831015	1.36631e-34
ENSG00000231322.4	2.38937e-32	-0.778045	1.41847e-34
ENSG00000155066.14	2.4247e-32	1.20412	1.44362e-34
ENSG00000064313.10	2.65145e-32	0.786789	1.5832e-34
ENSG00000135363.10	2.84636e-32	-1.01704	1.7045e-34
ENSG00000149557.11	3.09862e-32	-1.06124	1.86091e-34
ENSG00000077152.8	3.28307e-32	1.07664	1.97734e-34
ENSG00000164109.12	3.45965e-32	1.06903	2.08966e-34
ENSG00000070614.13	3.54895e-32	-1.03868	2.14973e-34
ENSG00000179967.11	3.60459e-32	0.938191	2.18965e-34
ENSG00000149564.10	3.61741e-32	-1.14652	2.20654e-34
ENSG00000198380.11	3.61741e-32	0.937811	2.20993e-34
ENSG00000123243.13	3.6675e-32	-1.30581	2.24686e-34
ENSG00000105011.7	4.74847e-32	1.07264	2.9173e-34
ENSG00000111961.15	5.58037e-32	-0.867353	3.43801e-34
ENSG00000139304.11	6.3473e-32	-0.531158	3.92147e-34
ENSG00000167261.12	8.83192e-32	-0.917155	5.47175e-34
ENSG00000171777.14	9.50064e-32	-0.718105	5.90244e-34
ENSG00000138685.11	1.08478e-31	-0.827911	6.75811e-34
ENSG00000163882.8	1.13104e-31	0.860668	7.06581e-34
ENSG00000106991.12	1.14879e-31	-1.07461	7.19652e-34
ENSG00000099260.9	1.26974e-31	-1.18029	7.97615e-34
ENSG00000100196.9	1.29949e-31	1.15891	8.18544e-34
ENSG00000162687.15	1.30726e-31	-0.621765	8.25697e-34
ENSG00000110492.14	1.33213e-31	1.50185	8.43704e-34
ENSG00000154783.9	1.3631e-31	-1.09187	8.65671e-34
ENSG00000103647.11	1.36634e-31	-0.757738	8.70084e-34
ENSG00000087074.7	1.40879e-31	-1.12428	8.99546e-34
ENSG00000138180.14	1.4971e-31	1.14941	9.58523e-34
ENSG00000174175.15	1.65285e-31	-1.07869	1.06109e-33
ENSG00000144331.17	1.71816e-31	-1.26815	1.10599e-33
ENSG00000261143.1	1.73467e-31	-0.629241	1.1196e-33
ENSG00000166927.11	1.77092e-31	-1.23162	1.14606e-33
ENSG00000225383.5	1.8937e-31	-1.2977	1.22879e-33
ENSG00000250722.4	2.05396e-31	-1.25202	1.33632e-33
ENSG00000133112.15	2.3635e-31	-5.03364	1.54179e-33
ENSG00000111275.11	2.47898e-31	-0.996135	1.6214e-33
ENSG00000168477.16	2.67447e-31	-1.62151	1.75387e-33
ENSG00000168743.11	2.69797e-31	-1.37437	1.77686e-33
ENSG00000173269.12	2.69797e-31	-1.09225	1.7786e-33
ENSG00000121075.8	3.48211e-31	-1.19262	2.30541e-33
ENSG00000186417.12	3.48211e-31	-1.16816	2.30754e-33
ENSG00000137842.5	3.52771e-31	0.837003	2.34385e-33
ENSG00000175063.15	3.61495e-31	1.41483	2.40805e-33
ENSG00000112984.10	3.70023e-31	1.07277	2.47125e-33
ENSG00000144655.13	3.75176e-31	-1.2192	2.51214e-33
ENSG00000104918.6	3.86242e-31	-0.770822	2.5929e-33
ENSG00000114200.8	3.92207e-31	-0.772691	2.63971e-33
ENSG00000046653.13	3.92599e-31	-1.16369	2.66016e-33
ENSG00000164619.7	3.92599e-31	-0.71649	2.66268e-33
ENSG00000183087.13	3.92599e-31	-1.17564	2.65778e-33
ENSG00000094804.8	3.99213e-31	1.13084	2.71442e-33
ENSG00000120645.10	4.04825e-31	-0.697165	2.75956e-33
ENSG00000144120.11	4.47975e-31	0.820434	3.06144e-33
ENSG00000154065.15	5.53523e-31	-1.25658	3.7923e-33
ENSG00000154188.8	5.99999e-31	-1.25519	4.12107e-33
ENSG00000167900.10	6.3338e-31	1.37339	4.36128e-33
ENSG00000115380.17	8.2583e-31	-1.25503	5.70068e-33
ENSG00000170477.11	8.27734e-31	-1.37703	5.72812e-33
ENSG00000184005.10	8.84737e-31	-0.67087	6.13786e-33
ENSG00000169679.13	8.96032e-31	1.17532	6.23168e-33
ENSG00000134690.9	1.0404e-30	1.06716	7.25367e-33
ENSG00000254726.2	1.07225e-30	1.2486	7.49424e-33
ENSG00000171303.6	1.21918e-30	-1.38679	8.5422e-33
ENSG00000066279.15	1.3003e-30	1.11402	9.13299e-33
ENSG00000162407.8	1.45819e-30	-0.815809	1.02671e-32
ENSG00000112425.12	1.55212e-30	-0.682211	1.09553e-32
ENSG00000165757.8	1.58938e-30	-1.17719	1.12457e-32
ENSG00000099953.8	1.65626e-30	1.68535	1.17475e-32
ENSG00000140254.11	1.69938e-30	-1.25196	1.20827e-32
ENSG00000171132.12	1.76528e-30	-0.921622	1.25817e-32
ENSG00000108773.9	1.99481e-30	0.965215	1.42521e-32
ENSG00000163145.11	2.01152e-30	-0.92026	1.44061e-32
ENSG00000171004.16	2.14674e-30	1.4856	1.54117e-32
ENSG00000156218.11	2.27074e-30	-1.16655	1.63411e-32
ENSG00000115896.14	2.28497e-30	-0.743165	1.64829e-32
ENSG00000170909.12	2.33358e-30	-1.20859	1.68738e-32
ENSG00000157456.6	2.33915e-30	1.07277	1.69544e-32
ENSG00000126602.9	2.54866e-30	0.784635	1.8517e-32
ENSG00000135069.12	2.66258e-30	1.23339	1.94159e-32
ENSG00000163710.6	2.66258e-30	-1.22474	1.94366e-32
ENSG00000146670.8	3.65679e-30	1.14754	2.67573e-32
ENSG00000109501.12	3.83177e-30	-0.975447	2.81038e-32
ENSG00000173482.15	4.13161e-30	-0.978172	3.03742e-32
ENSG00000104267.8	4.17828e-30	-1.14256	3.07895e-32
ENSG00000198554.10	4.57402e-30	0.913765	3.37845e-32
ENSG00000119203.12	4.79397e-30	0.732805	3.54919e-32
ENSG00000125740.12	5.03974e-30	-3.50531	3.73984e-32
ENSG00000012822.14	5.74752e-30	-0.805481	4.27498e-32
ENSG00000163492.12	6.08142e-30	-0.631237	4.53383e-32
ENSG00000079616.11	6.48122e-30	0.838365	4.84308e-32
ENSG00000168685.13	7.30695e-30	-1.29035	5.47271e-32
ENSG00000058335.14	7.89862e-30	-1.39129	5.92948e-32
ENSG00000197471.10	8.44045e-30	-1.20317	6.3508e-32
ENSG00000159063.11	1.09414e-29	0.790147	8.2515e-32
ENSG00000153093.17	1.10219e-29	-0.809853	8.33117e-32
ENSG00000244280.1	1.14434e-29	-0.608554	8.66954e-32
ENSG00000116678.17	1.17544e-29	-1.10344	8.92542e-32
ENSG00000145386.8	1.17987e-29	1.07464	8.97944e-32
ENSG00000261685.2	1.25167e-29	-0.80697	9.54748e-32
ENSG00000182481.7	1.30521e-29	1.10052	9.97843e-32
ENSG00000106688.10	1.33655e-29	-1.31243	1.02411e-31
ENSG00000155011.7	1.39535e-29	-0.858071	1.07157e-31
ENSG00000122694.14	1.43843e-29	-1.16246	1.10713e-31
ENSG00000143799.11	1.51163e-29	0.787138	1.16608e-31
ENSG00000136826.13	1.51928e-29	-1.36259	1.1746e-31
ENSG00000114346.12	1.66233e-29	0.891842	1.28807e-31
ENSG00000143320.7	1.72765e-29	2.11687	1.34167e-31
ENSG00000112964.12	2.07159e-29	-0.601077	1.61234e-31
ENSG00000164736.5	2.14083e-29	-0.725329	1.66992e-31
ENSG00000055813.5	2.26705e-29	-0.533027	1.77229e-31
ENSG00000183765.19	2.51961e-29	0.892951	1.97409e-31
ENSG00000152818.17	2.58276e-29	-0.996325	2.02802e-31
ENSG00000198826.9	2.77609e-29	0.988532	2.18461e-31
ENSG00000109846.6	2.82143e-29	-1.15511	2.22516e-31
ENSG00000120913.22	2.88415e-29	-0.988817	2.27961e-31
ENSG00000111602.10	3.19446e-29	0.863678	2.53038e-31
ENSG00000137474.18	3.24476e-29	1.00298	2.57583e-31
ENSG00000225342.2	3.27121e-29	-1.02709	2.60247e-31
ENSG00000137807.12	3.29417e-29	1.0243	2.62642e-31
ENSG00000197713.13	3.3936e-29	0.763472	2.71155e-31
ENSG00000141639.10	3.60789e-29	-0.664153	2.889e-31
ENSG00000167641.9	3.64896e-29	-1.05215	2.92819e-31
ENSG00000142945.11	3.66953e-29	1.1438	2.95102e-31
ENSG00000133561.14	3.68874e-29	-1.05075	2.97284e-31
ENSG00000077943.7	3.71225e-29	-1.16125	2.9982e-31
ENSG00000091428.16	3.74056e-29	-0.78492	3.02751e-31
ENSG00000103257.7	3.77686e-29	1.28896	3.06341e-31
ENSG00000137033.10	4.11426e-29	-1.26311	3.34417e-31
ENSG00000197930.11	4.19577e-29	0.979439	3.41767e-31
ENSG00000152402.9	4.2921e-29	-1.13867	3.50354e-31
ENSG00000157927.15	4.50446e-29	-0.714494	3.68466e-31
ENSG00000126785.11	4.72098e-29	-0.959956	3.86992e-31
ENSG00000175643.8	4.79417e-29	0.904293	3.93819e-31
ENSG00000116120.9	5.2637e-29	0.753873	4.33297e-31
ENSG00000124107.5	5.31085e-29	-2.02851	4.38095e-31
ENSG00000154734.13	5.96755e-29	-1.31313	4.93297e-31
ENSG00000134709.9	6.42813e-29	0.768098	5.32479e-31
ENSG00000123360.10	6.47442e-29	-0.748772	5.38548e-31
ENSG00000184226.13	6.47442e-29	-0.867797	5.38167e-31
ENSG00000123213.21	6.56525e-29	0.796262	5.47236e-31
ENSG00000137288.8	7.59781e-29	0.860067	6.34615e-31
ENSG00000166965.11	7.62528e-29	0.874259	6.38225e-31
ENSG00000137507.10	7.99531e-29	-1.14351	6.70576e-31
ENSG00000153823.17	8.0087e-29	-1.12112	6.73082e-31
ENSG00000180061.8	8.3133e-29	-0.695549	7.00116e-31
ENSG00000096063.13	9.06333e-29	0.781118	7.64845e-31
ENSG00000119969.13	9.49347e-29	0.906415	8.02782e-31
ENSG00000003147.16	1.05859e-28	0.810581	8.96982e-31
ENSG00000080503.18	1.15871e-28	-0.827657	9.83821e-31
ENSG00000187824.7	1.24419e-28	-0.724853	1.05855e-30
ENSG00000187800.12	1.38555e-28	-1.04416	1.1812e-30
ENSG00000169860.6	1.40216e-28	-0.830794	1.19779e-30
ENSG00000156802.11	1.42247e-28	0.854459	1.21759e-30
ENSG00000133026.11	1.52946e-28	-1.07819	1.31181e-30
ENSG00000128050.7	1.55268e-28	0.929511	1.33441e-30
ENSG00000074527.10	1.55926e-28	-1.03064	1.34275e-30
ENSG00000141448.7	1.63962e-28	-1.10379	1.41478e-30
ENSG00000198848.11	1.81246e-28	-1.51592	1.56705e-30
ENSG00000101938.13	1.95023e-28	-1.39829	1.68953e-30
ENSG00000078114.17	1.98526e-28	-0.971329	1.72331e-30
ENSG00000040275.15	2.04743e-28	0.803485	1.7808e-30
ENSG00000223573.5	2.23415e-28	-0.661777	1.94706e-30
ENSG00000048740.16	2.44909e-28	-0.913892	2.13861e-30
ENSG00000137726.14	2.5003e-28	-1.04537	2.18764e-30
ENSG00000119457.7	2.55909e-28	-0.992555	2.2435e-30
ENSG00000117114.18	2.5646e-28	-1.00269	2.25276e-30
ENSG00000000938.11	2.58397e-28	-1.06719	2.27423e-30
ENSG00000113368.10	2.60447e-28	0.946808	2.29677e-30
ENSG00000131055.4	2.69194e-28	-0.79962	2.37854e-30
ENSG00000006634.6	2.8239e-28	0.846095	2.50002e-30
ENSG00000079462.6	2.84111e-28	1.17789	2.52016e-30
ENSG00000136628.16	2.84911e-28	0.78191	2.53217e-30
ENSG00000032444.14	2.9393e-28	-0.893204	2.6174e-30
ENSG00000179144.4	3.21509e-28	-1.02864	2.86853e-30
ENSG00000159713.9	3.2219e-28	-1.57519	2.88017e-30
ENSG00000101457.11	3.28585e-28	0.945034	2.94301e-30
ENSG00000136404.14	3.38017e-28	-0.70141	3.03332e-30
ENSG00000156298.11	4.00663e-28	-1.24426	3.60242e-30
ENSG00000085760.13	4.21221e-28	0.754633	3.79452e-30
ENSG00000033170.15	4.27705e-28	0.884714	3.86031e-30
ENSG00000183807.7	4.38801e-28	-0.621765	3.96803e-30
ENSG00000090889.11	4.41137e-28	1.0486	4.00328e-30
ENSG00000111859.15	4.41137e-28	-1.23612	4.00438e-30
ENSG00000004864.12	4.58597e-28	0.760748	4.17079e-30
ENSG00000148175.11	4.8462e-28	-0.994044	4.41582e-30
ENSG00000182253.13	4.99791e-28	-0.971551	4.56269e-30
ENSG00000157734.12	5.45204e-28	-0.925012	4.98668e-30
ENSG00000125848.9	5.91435e-28	-1.27898	5.41973e-30
ENSG00000172322.12	6.21545e-28	-0.773578	5.70638e-30
ENSG00000204217.11	7.01422e-28	-0.854998	6.45183e-30
ENSG00000186340.13	8.13991e-28	1.40095	7.50131e-30
ENSG00000132970.11	8.36146e-28	-1.02287	7.71992e-30
ENSG00000012779.9	9.31622e-28	-1.11525	8.6175e-30
ENSG00000206053.11	9.94792e-28	0.818185	9.21899e-30
ENSG00000186188.9	1.03849e-27	-0.729447	9.64184e-30
ENSG00000133246.10	1.07797e-27	-1.0039	1.00271e-29
ENSG00000163687.12	1.08705e-27	-0.940314	1.01302e-29
ENSG00000254122.2	1.12442e-27	-0.695802	1.04979e-29
ENSG00000189241.6	1.21347e-27	-0.685823	1.13503e-29
ENSG00000169583.12	1.25323e-27	-1.17421	1.17438e-29
ENSG00000164305.16	1.25516e-27	0.754126	1.17835e-29
ENSG00000176890.14	1.29214e-27	0.995977	1.2153e-29
ENSG00000092295.10	1.31242e-27	-0.578394	1.23664e-29
ENSG00000159640.13	1.36771e-27	-1.02538	1.2911e-29
ENSG00000005156.10	1.54765e-27	0.728972	1.46363e-29
ENSG00000125450.9	1.55499e-27	0.750135	1.47325e-29
ENSG00000156052.9	1.63805e-27	-0.745921	1.55477e-29
ENSG00000197766.6	1.91196e-27	-1.35457	1.81806e-29
ENSG00000183486.11	1.96614e-27	0.889086	1.87297e-29
ENSG00000169442.7	2.03124e-27	-1.29805	1.93849e-29
ENSG00000119285.9	2.14672e-27	0.71611	2.05239e-29
ENSG00000164659.13	2.25033e-27	-1.04749	2.15534e-29
ENSG00000203499.9	2.29502e-27	1.16442	2.2021e-29
ENSG00000235584.2	2.31636e-27	-0.981087	2.22658e-29
ENSG00000114378.15	2.51178e-27	-1.28487	2.41875e-29
ENSG00000130590.12	2.56027e-27	0.855948	2.46987e-29
ENSG00000176697.17	2.59946e-27	-0.644575	2.51216e-29
ENSG00000110660.13	2.69728e-27	0.943323	2.61136e-29
ENSG00000144354.12	3.08245e-27	1.12447	2.99219e-29
ENSG00000168528.10	3.08245e-27	1.01435	2.99489e-29
ENSG00000159055.3	3.16392e-27	0.808712	3.0795e-29
ENSG00000119862.11	3.24385e-27	-1.00288	3.16291e-29
ENSG00000082213.16	3.28219e-27	0.743799	3.20595e-29
ENSG00000100558.7	3.31428e-27	1.00361	3.24993e-29
ENSG00000135632.10	3.31428e-27	0.745541	3.25079e-29
ENSG00000159259.7	3.31428e-27	0.844606	3.25446e-29
ENSG00000181192.10	3.36529e-27	0.770822	3.31035e-29
ENSG00000073111.12	3.75971e-27	0.934833	3.7113e-29
ENSG00000111077.16	3.75971e-27	-0.953778	3.71036e-29
ENSG00000148344.10	3.86615e-27	1.32732	3.82305e-29
ENSG00000150938.8	4.02066e-27	-0.873531	3.98971e-29
ENSG00000180772.6	4.02066e-27	-1.22585	3.98566e-29
ENSG00000108823.14	4.04655e-27	-0.779313	4.02238e-29
ENSG00000135111.13	4.30278e-27	-1.07648	4.28451e-29
ENSG00000167747.12	4.36032e-27	0.796262	4.34933e-29
ENSG00000166923.9	4.70256e-27	1.55476	4.69882e-29
ENSG00000177494.5	4.90723e-27	-0.954285	4.91181e-29
ENSG00000123473.14	5.92578e-27	0.813084	5.94153e-29
ENSG00000100442.9	6.42506e-27	0.780041	6.45322e-29
ENSG00000198804.2	6.75526e-27	-4.95625	6.79653e-29
ENSG00000137393.9	7.15947e-27	-0.87258	7.21556e-29
ENSG00000079385.20	7.43397e-27	0.933217	7.50504e-29
ENSG00000278053.3	7.7569e-27	0.714621	7.84444e-29
ENSG00000276043.3	8.05654e-27	0.927103	8.16137e-29
ENSG00000106089.10	8.61882e-27	0.971963	8.74584e-29
ENSG00000112531.15	8.64993e-27	-0.790686	8.79234e-29
ENSG00000197872.10	9.07097e-27	-0.906289	9.23597e-29
ENSG00000235997.2	9.18715e-27	-0.72384	9.37011e-29
ENSG00000137872.14	9.5183e-27	-1.03941	9.72428e-29
ENSG00000151651.14	1.00995e-26	1.03029	1.03355e-28
ENSG00000138207.11	1.0146e-26	-1.06596	1.04006e-28
ENSG00000090530.8	1.0312e-26	-1.42474	1.05885e-28
ENSG00000101407.11	1.13652e-26	0.728719	1.16896e-28
ENSG00000165124.16	1.18727e-26	-1.20776	1.22321e-28
ENSG00000156804.6	1.24732e-26	1.03003	1.28723e-28
ENSG00000151715.6	1.48909e-26	0.940314	1.5393e-28
ENSG00000133195.10	1.72398e-26	0.78039	1.78509e-28
ENSG00000174837.13	1.72504e-26	-0.751877	1.78916e-28
ENSG00000135049.14	1.81558e-26	-0.754253	1.8862e-28
ENSG00000128654.12	1.89865e-26	0.765722	1.97578e-28
ENSG00000061656.8	2.05257e-26	0.93271	2.13949e-28
ENSG00000124766.5	2.26937e-26	0.950515	2.3694e-28
ENSG00000198886.2	2.50228e-26	-5.00672	2.61689e-28
ENSG00000234456.6	2.52869e-26	-0.975543	2.64887e-28
ENSG00000144681.9	2.5739e-26	-1.0408	2.70067e-28
ENSG00000241399.5	2.72793e-26	-0.978679	2.86699e-28
ENSG00000141562.16	2.74731e-26	0.791224	2.8921e-28
ENSG00000164687.9	2.76516e-26	-1.13581	2.91567e-28
ENSG00000128165.8	2.78772e-26	0.971836	2.94427e-28
ENSG00000137834.13	3.00054e-26	-1.13395	3.17421e-28
ENSG00000120253.12	3.36246e-26	0.718739	3.56288e-28
ENSG00000214491.7	3.88497e-26	-0.981847	4.12324e-28
ENSG00000115306.14	3.95799e-26	-4.43589	4.20757e-28
ENSG00000279662.1	4.0014e-26	-0.801109	4.26063e-28
ENSG00000232119.6	4.02343e-26	0.753018	4.29103e-28
ENSG00000122042.9	4.257e-26	-0.756249	4.54748e-28
ENSG00000118407.13	4.28542e-26	-1.10939	4.58524e-28
ENSG00000066056.12	4.36948e-26	-1.00814	4.68272e-28
ENSG00000133392.15	4.61347e-26	-1.48867	4.95216e-28
ENSG00000164236.10	4.73406e-26	-0.673499	5.08977e-28
ENSG00000246430.5	5.01399e-26	-0.438809	5.39939e-28
ENSG00000119138.4	5.18133e-26	-0.899667	5.58854e-28
ENSG00000230124.5	5.55111e-26	0.7246	5.99695e-28
ENSG00000068489.11	5.72137e-26	0.945668	6.19076e-28
ENSG00000143493.11	5.89441e-26	0.697196	6.38817e-28
ENSG00000139874.5	6.00327e-26	-0.839252	6.51651e-28
ENSG00000177888.7	6.14911e-26	0.716743	6.68543e-28
ENSG00000264230.6	6.2553e-26	-0.574782	6.81167e-28
ENSG00000011347.8	6.4633e-26	1.50825	7.04934e-28
ENSG00000100522.7	6.68831e-26	0.764486	7.30628e-28
ENSG00000115602.15	7.68157e-26	-1.2109	8.40457e-28
ENSG00000272620.1	7.78449e-26	1.71963	8.53062e-28
ENSG00000072657.7	7.93783e-26	-0.521939	8.71235e-28
ENSG00000136732.13	8.0933e-26	-0.92536	8.89696e-28
ENSG00000111058.6	8.64957e-26	-1.04781	9.5234e-28
ENSG00000101003.9	8.97628e-26	0.88972	9.8986e-28
ENSG00000151725.10	9.07832e-26	0.898812	1.00268e-27
ENSG00000145990.9	9.4159e-26	-0.971773	1.04321e-27
ENSG00000158270.11	9.4159e-26	-1.13068	1.04222e-27
ENSG00000143110.10	9.47171e-26	-0.97833	1.05103e-27
ENSG00000067704.9	9.83123e-26	0.732077	1.09262e-27
ENSG00000143374.13	1.00861e-25	0.767844	1.12269e-27
ENSG00000087589.15	1.02358e-25	-0.952574	1.14111e-27
ENSG00000087086.12	1.08852e-25	-5.06168	1.2154e-27
ENSG00000165434.7	1.11178e-25	0.853097	1.24329e-27
ENSG00000146072.6	1.11958e-25	0.951655	1.25393e-27
ENSG00000133466.12	1.15258e-25	1.11148	1.29289e-27
ENSG00000132680.9	1.24239e-25	0.802725	1.39578e-27
ENSG00000203878.10	1.25802e-25	-0.785775	1.41551e-27
ENSG00000271447.4	1.29529e-25	-1.06929	1.45968e-27
ENSG00000198624.11	1.35557e-25	-0.934168	1.52995e-27
ENSG00000008441.15	1.6345e-25	-0.973958	1.84758e-27
ENSG00000166803.9	1.70797e-25	0.943672	1.93357e-27
ENSG00000136153.18	1.85023e-25	-1.37326	2.09782e-27
ENSG00000163362.9	1.95583e-25	1.06073	2.22092e-27
ENSG00000173372.15	1.97107e-25	-1.22629	2.24163e-27
ENSG00000127586.15	2.19135e-25	0.971202	2.49593e-27
ENSG00000136842.12	2.27667e-25	-0.652431	2.59703e-27
ENSG00000111641.9	2.30364e-25	0.752637	2.63178e-27
ENSG00000204220.8	2.67773e-25	0.730714	3.06378e-27
ENSG00000156675.14	2.87828e-25	-1.06175	3.29821e-27
ENSG00000171522.5	2.95845e-25	-0.951877	3.39517e-27
ENSG00000173137.10	3.1058e-25	0.887597	3.56964e-27
ENSG00000169926.8	3.11042e-25	-0.864819	3.58032e-27
ENSG00000132436.10	3.34551e-25	0.84109	3.85669e-27
ENSG00000129353.13	3.35286e-25	-0.775923	3.87095e-27
ENSG00000113594.8	3.41793e-25	-1.09583	3.95198e-27
ENSG00000095002.11	4.31257e-25	0.761983	4.99385e-27
ENSG00000141469.15	4.68993e-25	-0.665262	5.43892e-27
ENSG00000138738.9	4.7167e-25	-0.69482	5.4781e-27
ENSG00000013810.17	4.80267e-25	0.854079	5.58624e-27
ENSG00000151702.15	4.99553e-25	-0.830287	5.82513e-27
ENSG00000165474.5	4.99553e-25	1.23738	5.82781e-27
ENSG00000160753.14	5.05572e-25	0.760843	5.90675e-27
ENSG00000108846.14	5.09827e-25	1.25997	5.96525e-27
ENSG00000139579.11	5.17467e-25	0.730841	6.06358e-27
ENSG00000157778.7	5.28647e-25	0.813338	6.2037e-27
ENSG00000112320.10	5.42066e-25	-0.667892	6.37054e-27
ENSG00000066629.15	5.49879e-25	-0.962205	6.47184e-27
ENSG00000144642.19	5.88866e-25	-0.988278	6.94087e-27
ENSG00000177303.8	5.92186e-25	-0.737621	6.99022e-27
ENSG00000102575.9	6.32812e-25	-1.16106	7.48069e-27
ENSG00000122565.17	6.53252e-25	0.775669	7.7336e-27
ENSG00000126787.11	7.26083e-25	0.900935	8.60835e-27
ENSG00000134962.6	7.34639e-25	-0.541264	8.72246e-27
ENSG00000155660.9	7.42846e-25	1.00776	8.83272e-27
ENSG00000117597.16	7.48778e-25	0.708411	8.91617e-27
ENSG00000053372.4	7.49816e-25	0.718105	8.94147e-27
ENSG00000181649.5	8.08546e-25	1.17418	9.65578e-27
ENSG00000158373.8	8.12754e-25	1.05183	9.72006e-27
ENSG00000101955.13	8.23471e-25	-0.944844	9.86244e-27
ENSG00000173369.14	8.59492e-25	-1.6397	1.03087e-26
ENSG00000185483.10	8.87277e-25	-0.9476	1.06572e-26
ENSG00000172403.9	9.17999e-25	-1.05208	1.10421e-26
ENSG00000138722.8	9.81492e-25	-1.10363	1.18228e-26
ENSG00000161281.9	9.90631e-25	-0.783304	1.19499e-26
ENSG00000146242.7	1.02586e-24	0.794646	1.23926e-26
ENSG00000078596.9	1.05819e-24	-1.03963	1.28014e-26
ENSG00000066855.14	1.17095e-24	0.762744	1.41857e-26
ENSG00000184009.8	1.18587e-24	-4.85829	1.4387e-26
ENSG00000143416.19	1.22858e-24	-1.23837	1.49263e-26
ENSG00000130762.13	1.31513e-24	0.845874	1.60006e-26
ENSG00000138670.15	1.33366e-24	-0.830413	1.6249e-26
ENSG00000157570.10	1.36158e-24	-0.99962	1.66127e-26
ENSG00000213203.2	1.38572e-24	-0.903596	1.69311e-26
ENSG00000175130.6	1.39315e-24	1.0703	1.70459e-26
ENSG00000116005.10	1.63755e-24	-0.710819	2.00645e-26
ENSG00000103034.13	1.64205e-24	-1.06748	2.01481e-26
ENSG00000088926.12	1.66094e-24	-0.572913	2.04085e-26
ENSG00000123352.16	1.68963e-24	0.714272	2.07901e-26
ENSG00000178826.9	1.69108e-24	-0.844131	2.08372e-26
ENSG00000111640.13	1.72229e-24	0.478853	2.12515e-26
ENSG00000249859.6	1.79384e-24	0.88785	2.21653e-26
ENSG00000102935.10	1.83307e-24	-0.652558	2.26817e-26
ENSG00000137547.7	2.02657e-24	0.787518	2.51459e-26
ENSG00000137700.15	2.02657e-24	0.732837	2.51316e-26
ENSG00000120129.5	2.04709e-24	-3.00675	2.54358e-26
ENSG00000048991.15	2.09065e-24	0.67464	2.60131e-26
ENSG00000131462.6	2.30384e-24	0.724473	2.87056e-26
ENSG00000154330.11	2.69706e-24	-1.05291	3.36516e-26
ENSG00000079819.15	2.71793e-24	-0.792713	3.39589e-26
ENSG00000138735.14	2.75127e-24	-0.869159	3.44229e-26
ENSG00000168079.15	2.76457e-24	-1.03954	3.46371e-26
ENSG00000141696.11	3.41703e-24	0.983463	4.29296e-26
ENSG00000175662.16	3.41703e-24	-0.761318	4.2895e-26
ENSG00000188486.3	3.59494e-24	0.794393	4.52268e-26
ENSG00000205795.4	3.92521e-24	-0.811849	4.94496e-26
ENSG00000197405.6	3.93573e-24	-0.985332	4.96501e-26
ENSG00000179889.17	4.10395e-24	0.757738	5.18429e-26
ENSG00000049283.16	4.15129e-24	1.01632	5.25127e-26
ENSG00000068615.15	4.15305e-24	-0.650689	5.26065e-26
ENSG00000117791.14	4.16854e-24	-0.907778	5.28747e-26
ENSG00000172262.10	4.40685e-24	0.682243	5.59736e-26
ENSG00000106077.17	4.45589e-24	0.808966	5.66733e-26
ENSG00000116191.16	4.51521e-24	0.912308	5.75056e-26
ENSG00000154678.15	4.92531e-24	-0.607825	6.28137e-26
ENSG00000159200.16	4.92794e-24	-0.86013	6.29323e-26
ENSG00000145194.16	4.94841e-24	0.813084	6.32791e-26
ENSG00000148848.13	5.01508e-24	1.15302	6.42182e-26
ENSG00000184500.13	5.08056e-24	-0.937779	6.51443e-26
ENSG00000143633.11	5.29333e-24	0.6837	6.7964e-26
ENSG00000108106.12	5.4443e-24	0.967211	6.99963e-26
ENSG00000183283.14	5.56864e-24	-0.723238	7.1691e-26
ENSG00000186193.8	5.60916e-24	0.914019	7.23095e-26
ENSG00000152455.14	6.25924e-24	0.710154	8.07978e-26
ENSG00000046889.17	6.31922e-24	-1.00916	8.16811e-26
ENSG00000118507.14	6.7654e-24	-0.681483	8.75652e-26
ENSG00000124664.9	6.96322e-24	1.33008	9.02457e-26
ENSG00000085978.20	7.05145e-24	0.686457	9.15109e-26
ENSG00000198682.11	7.47296e-24	-0.897703	9.711e-26
ENSG00000137575.10	7.67005e-24	-0.684334	9.98035e-26
ENSG00000137809.15	8.01541e-24	1.27299	1.04436e-25
ENSG00000178568.12	8.22757e-24	-0.647077	1.07342e-25
ENSG00000114631.10	8.92721e-24	1.39823	1.16624e-25
ENSG00000124920.12	1.00236e-23	-1.29777	1.3112e-25
ENSG00000136869.13	1.07644e-23	-0.940314	1.40996e-25
ENSG00000120457.10	1.1909e-23	-0.942721	1.56195e-25
ENSG00000185291.9	1.20665e-23	-0.856518	1.58469e-25
ENSG00000118523.5	1.21032e-23	-1.76268	1.5916e-25
ENSG00000198753.10	1.22942e-23	1.05607	1.61884e-25
ENSG00000106809.9	1.23134e-23	-1.03231	1.62348e-25
ENSG00000065675.13	1.2385e-23	-0.674006	1.63506e-25
ENSG00000169241.16	1.3342e-23	0.902614	1.7637e-25
ENSG00000279453.1	1.42138e-23	-0.671281	1.88141e-25
ENSG00000156531.15	1.45233e-23	0.669032	1.92738e-25
ENSG00000162433.13	1.45233e-23	1.16398	1.92623e-25
ENSG00000172201.9	1.50909e-23	-1.06678	2.00531e-25
ENSG00000152137.5	1.53825e-23	-1.08877	2.04672e-25
ENSG00000129235.9	1.55549e-23	0.914114	2.07234e-25
ENSG00000124785.7	1.63678e-23	-0.874671	2.18346e-25
ENSG00000058804.11	1.70138e-23	0.706415	2.27258e-25
ENSG00000185507.18	1.7155e-23	0.772691	2.2944e-25
ENSG00000134285.9	1.90873e-23	0.827784	2.55613e-25
ENSG00000167513.7	1.99173e-23	0.923111	2.67071e-25
ENSG00000173848.17	2.01086e-23	0.837383	2.69984e-25
ENSG00000171792.9	2.10495e-23	0.702677	2.8298e-25
ENSG00000137309.18	2.1124e-23	1.03364	2.84346e-25
ENSG00000137960.5	2.51629e-23	-0.605322	3.39147e-25
ENSG00000070731.8	2.52399e-23	-1.00634	3.40621e-25
ENSG00000210082.2	2.90944e-23	-4.97494	3.93141e-25
ENSG00000112419.13	3.67424e-23	-0.707714	4.97119e-25
ENSG00000154127.8	3.81299e-23	-0.983526	5.1655e-25
ENSG00000159176.12	4.14039e-23	-0.7393	5.61617e-25
ENSG00000013297.9	4.20818e-23	-0.63412	5.71538e-25
ENSG00000186594.11	4.31641e-23	-0.816696	5.86983e-25
ENSG00000071282.10	4.37351e-23	-0.803168	5.95503e-25
ENSG00000176971.3	4.37351e-23	-1.0428	5.96257e-25
ENSG00000001167.13	4.64327e-23	0.670996	6.33836e-25
ENSG00000073712.12	4.67866e-23	-0.711104	6.39474e-25
ENSG00000142871.14	4.74952e-23	-2.04508	6.49979e-25
ENSG00000117593.9	4.872e-23	0.699065	6.67581e-25
ENSG00000112312.8	4.9863e-23	0.782259	6.84105e-25
ENSG00000104783.10	5.07977e-23	1.41879	6.97804e-25
ENSG00000185803.7	5.5402e-23	0.738254	7.6201e-25
ENSG00000080546.12	5.69141e-23	-0.793886	7.8379e-25
ENSG00000035664.10	5.89968e-23	-0.981815	8.13489e-25
ENSG00000138035.13	6.4474e-23	0.722477	8.90125e-25
ENSG00000220205.7	6.48317e-23	-0.737906	8.96182e-25
ENSG00000165996.12	7.21641e-23	-0.635007	9.98785e-25
ENSG00000130224.13	7.39312e-23	-0.634247	1.02579e-24
ENSG00000149131.14	7.39312e-23	-1.46127	1.02516e-24
ENSG00000167088.9	8.05145e-23	0.733185	1.11853e-24
ENSG00000109065.10	8.08156e-23	0.700681	1.1241e-24
ENSG00000116212.13	8.22151e-23	0.671028	1.14499e-24
ENSG00000113231.12	8.35559e-23	-0.683605	1.16511e-24
ENSG00000139112.9	8.47407e-23	-0.744654	1.18309e-24
ENSG00000235501.4	8.86715e-23	-0.656677	1.2395e-24
ENSG00000117411.15	9.01563e-23	0.726438	1.26181e-24
ENSG00000115364.12	9.32384e-23	0.654301	1.30655e-24
ENSG00000165304.6	9.53718e-23	0.865421	1.33809e-24
ENSG00000185010.12	9.56956e-23	-0.892698	1.34429e-24
ENSG00000091073.18	9.64876e-23	0.773832	1.35708e-24
ENSG00000174099.9	9.8733e-23	-0.933851	1.39037e-24
ENSG00000019102.10	9.89601e-23	-1.10144	1.39527e-24
ENSG00000155265.9	1.00995e-22	1.0856	1.4257e-24
ENSG00000124602.8	1.01633e-22	0.919626	1.43646e-24
ENSG00000169174.10	1.0393e-22	-1.06824	1.47072e-24
ENSG00000101916.11	1.10598e-22	-0.905211	1.567e-24
ENSG00000107833.9	1.14717e-22	0.916712	1.62734e-24
ENSG00000078269.12	1.15192e-22	0.813243	1.63606e-24
ENSG00000101280.7	1.16839e-22	-0.41999	1.66147e-24
ENSG00000197852.9	1.20513e-22	-0.650594	1.71579e-24
ENSG00000165704.13	1.23187e-22	0.719373	1.75599e-24
ENSG00000067177.13	1.23611e-22	0.838936	1.76417e-24
ENSG00000109805.8	1.24133e-22	0.859813	1.77376e-24
ENSG00000141570.9	1.25515e-22	0.778425	1.79568e-24
ENSG00000109771.14	1.28431e-22	-0.675622	1.83961e-24
ENSG00000261269.1	1.28683e-22	-0.542753	1.84544e-24
ENSG00000123178.13	1.33815e-22	-0.705877	1.92134e-24
ENSG00000005175.8	1.35487e-22	0.654079	1.94769e-24
ENSG00000167767.12	1.36013e-22	1.23045	1.9576e-24
ENSG00000140945.14	1.37493e-22	-0.987866	1.98127e-24
ENSG00000136875.11	1.39436e-22	0.67936	2.01168e-24
ENSG00000186141.7	1.49327e-22	0.668905	2.15696e-24
ENSG00000147443.11	1.64326e-22	-0.996008	2.37644e-24
ENSG00000155438.10	1.7809e-22	0.699794	2.57857e-24
ENSG00000100625.8	1.80537e-22	0.895802	2.61711e-24
ENSG00000123485.10	1.87579e-22	0.884112	2.72242e-24
ENSG00000197008.8	1.88072e-22	0.700808	2.73283e-24
ENSG00000147535.15	1.89335e-22	0.76683	2.75445e-24
ENSG00000064205.9	1.94716e-22	-1.06862	2.83609e-24
ENSG00000163755.7	1.97581e-22	0.686203	2.88124e-24
ENSG00000100060.16	2.00866e-22	-0.855188	2.9326e-24
ENSG00000174059.15	2.05338e-22	-0.802693	3.00144e-24
ENSG00000115641.17	2.36371e-22	1.10981	3.45913e-24
ENSG00000108924.12	2.38369e-22	-0.989894	3.49248e-24
ENSG00000156970.11	2.46854e-22	0.85221	3.62106e-24
ENSG00000157992.11	2.50082e-22	0.788785	3.67272e-24
ENSG00000180871.6	2.63975e-22	-0.529415	3.88132e-24
ENSG00000101464.9	2.64155e-22	0.669159	3.88852e-24
ENSG00000160408.13	2.85542e-22	-0.755109	4.20828e-24
ENSG00000077232.15	2.91126e-22	0.763726	4.29561e-24
ENSG00000101146.11	3.02868e-22	0.685601	4.47408e-24
ENSG00000117650.11	3.0631e-22	0.850467	4.53525e-24
ENSG00000185842.13	3.0631e-22	0.719626	4.5355e-24
ENSG00000100243.19	3.11171e-22	-0.779914	4.61284e-24
ENSG00000135127.10	3.1143e-22	0.987518	4.62206e-24
ENSG00000065911.10	3.14247e-22	0.853287	4.66929e-24
ENSG00000105865.9	3.15238e-22	0.676636	4.68945e-24
ENSG00000145354.8	3.26983e-22	0.699794	4.86982e-24
ENSG00000138074.13	3.27862e-22	0.698812	4.88856e-24
ENSG00000178295.13	3.43439e-22	0.747632	5.12676e-24
ENSG00000042980.11	3.5423e-22	1.145	5.29395e-24
ENSG00000105821.13	3.64577e-22	0.646729	5.45487e-24
ENSG00000118946.10	3.65669e-22	-0.923998	5.47752e-24
ENSG00000204161.12	3.82873e-22	-0.86786	5.74184e-24
ENSG00000143324.12	3.90711e-22	0.854712	5.86612e-24
ENSG00000153046.16	3.9451e-22	0.672264	5.92997e-24
ENSG00000121068.12	4.06945e-22	-0.979471	6.12392e-24
ENSG00000135476.10	4.31503e-22	0.848598	6.50091e-24
ENSG00000137941.15	4.34228e-22	-0.755394	6.54947e-24
ENSG00000161940.9	4.78797e-22	-0.908253	7.22997e-24
ENSG00000141582.13	4.80063e-22	0.716997	7.25736e-24
ENSG00000131634.12	4.80637e-22	-0.913639	7.27433e-24
ENSG00000047457.12	4.87281e-22	1.69092	7.38331e-24
ENSG00000176438.11	5.03545e-22	-0.934896	7.63842e-24
ENSG00000164647.7	5.27979e-22	1.07812	8.01817e-24
ENSG00000059573.7	5.31368e-22	0.719278	8.07881e-24
ENSG00000186074.17	5.33571e-22	-0.90971	8.12152e-24
ENSG00000102921.6	5.52591e-22	-0.620022	8.42057e-24
ENSG00000160593.16	5.57706e-22	-0.937589	8.50812e-24
ENSG00000122707.10	5.77761e-22	-0.782861	8.84162e-24
ENSG00000157181.13	5.77761e-22	0.652431	8.84399e-24
ENSG00000187688.13	5.77761e-22	-0.866688	8.82876e-24
ENSG00000006118.13	5.83189e-22	0.963377	8.93714e-24
ENSG00000078098.12	5.9449e-22	1.0102	9.12059e-24
ENSG00000205038.10	5.97247e-22	-0.529415	9.17319e-24
ENSG00000108179.12	5.97467e-22	0.701758	9.18688e-24
ENSG00000173207.11	6.10734e-22	0.89501	9.40142e-24
ENSG00000169554.15	6.18729e-22	-0.776525	9.53517e-24
ENSG00000102547.17	6.49519e-22	-0.787486	1.00209e-23
ENSG00000046604.11	6.94936e-22	0.823792	1.07336e-23
ENSG00000137710.13	7.05203e-22	-0.665421	1.09043e-23
ENSG00000213088.8	7.10639e-22	-1.19525	1.10006e-23
ENSG00000171124.11	7.16283e-22	1.10851	1.11004e-23
ENSG00000136205.15	7.25296e-22	-0.781879	1.12526e-23
ENSG00000172037.12	7.44067e-22	-0.814541	1.15566e-23
ENSG00000143621.15	7.47496e-22	0.692412	1.16228e-23
ENSG00000146966.11	7.58513e-22	-0.894757	1.18072e-23
ENSG00000152766.5	7.81164e-22	0.977443	1.21733e-23
ENSG00000137486.15	8.00926e-22	-0.811183	1.2495e-23
ENSG00000176102.10	8.07293e-22	0.620561	1.26083e-23
ENSG00000255717.5	8.53315e-22	0.761381	1.33418e-23
ENSG00000144231.9	8.65946e-22	0.602946	1.35542e-23
ENSG00000133872.12	9.09939e-22	-0.706891	1.42585e-23
ENSG00000003249.12	1.03228e-21	0.994076	1.61934e-23
ENSG00000125885.12	1.03815e-21	0.763821	1.63034e-23
ENSG00000008300.13	1.07755e-21	0.925234	1.69407e-23
ENSG00000120738.7	1.0914e-21	-2.75584	1.71774e-23
ENSG00000125910.5	1.11012e-21	-0.759512	1.74911e-23
ENSG00000082175.13	1.12882e-21	-0.559956	1.78053e-23
ENSG00000182782.7	1.23966e-21	-0.680374	1.95749e-23
ENSG00000076248.9	1.29685e-21	0.690702	2.05003e-23
ENSG00000173715.14	1.32929e-21	0.743228	2.1036e-23
ENSG00000165689.15	1.34105e-21	0.691335	2.12454e-23
ENSG00000100426.6	1.44492e-21	0.649834	2.29159e-23
ENSG00000072571.18	1.77921e-21	0.82978	2.82482e-23
ENSG00000120254.14	1.80164e-21	0.664914	2.86355e-23
ENSG00000169218.12	1.91971e-21	-0.365405	3.05451e-23
ENSG00000120833.12	1.99585e-21	-1.15866	3.17911e-23
ENSG00000188921.13	2.00262e-21	-0.771709	3.19335e-23
ENSG00000128016.5	2.02477e-21	-2.33312	3.23217e-23
ENSG00000137573.12	2.0873e-21	1.28345	3.33559e-23
ENSG00000168542.11	2.30574e-21	0.97776	3.68864e-23
ENSG00000148606.11	2.34077e-21	0.663425	3.74872e-23
ENSG00000183722.7	2.47186e-21	-0.794297	3.96292e-23
ENSG00000120509.9	2.52971e-21	0.700048	4.06003e-23
ENSG00000255399.3	2.59562e-21	-0.736575	4.1703e-23
ENSG00000137819.12	2.7467e-21	-0.962205	4.41777e-23
ENSG00000117139.15	2.79067e-21	0.688484	4.49331e-23
ENSG00000187323.10	3.01472e-21	-0.484176	4.85926e-23
ENSG00000214160.8	3.03024e-21	0.6837	4.8895e-23
ENSG00000174640.11	3.26767e-21	-1.18568	5.27826e-23
ENSG00000116957.11	3.37801e-21	0.635514	5.46233e-23
ENSG00000180329.12	3.38456e-21	0.616822	5.47876e-23
ENSG00000154124.4	3.39272e-21	0.668779	5.49782e-23
ENSG00000144285.14	3.73085e-21	-0.601837	6.05219e-23
ENSG00000163431.12	3.84505e-21	-1.00348	6.24408e-23
ENSG00000169282.16	4.22696e-21	-0.506986	6.87156e-23
ENSG00000100234.11	4.39935e-21	-0.985997	7.1594e-23
ENSG00000157510.12	4.46906e-21	-0.825249	7.28055e-23
ENSG00000124813.19	4.48516e-21	0.887819	7.31453e-23
ENSG00000121152.8	4.68113e-21	0.799873	7.6422e-23
ENSG00000174442.10	4.711e-21	0.622873	7.6991e-23
ENSG00000186642.14	4.81066e-21	-0.806495	7.87026e-23
ENSG00000106344.7	4.95713e-21	0.659179	8.11844e-23
ENSG00000108821.12	5.05921e-21	0.871693	8.29435e-23
ENSG00000121552.3	5.08314e-21	-0.692349	8.34236e-23
ENSG00000139835.12	5.11586e-21	0.80697	8.4049e-23
ENSG00000116701.13	5.28495e-21	-0.926184	8.70092e-23
ENSG00000147655.9	5.28495e-21	-0.493775	8.69953e-23
ENSG00000116690.10	5.31867e-21	-1.19097	8.76563e-23
ENSG00000182985.15	5.34072e-21	-1.04277	8.81119e-23
ENSG00000145287.9	5.37985e-21	-0.938159	8.88503e-23
ENSG00000144891.16	5.55438e-21	-0.505116	9.18285e-23
ENSG00000138311.14	5.74663e-21	-0.471091	9.51061e-23
ENSG00000011465.15	5.88793e-21	-2.81099	9.75461e-23
ENSG00000106541.10	6.4025e-21	1.08345	1.06182e-22
ENSG00000112242.13	6.86064e-21	0.728243	1.13898e-22
ENSG00000143436.9	7.00226e-21	0.634722	1.1637e-22
ENSG00000184216.10	7.04443e-21	0.756122	1.17192e-22
ENSG00000162520.13	7.06636e-21	-0.488041	1.17679e-22
ENSG00000152661.7	7.3358e-21	-0.943703	1.22293e-22
ENSG00000198576.3	7.36107e-21	-0.565183	1.22841e-22
ENSG00000247077.5	7.41124e-21	0.694915	1.23806e-22
ENSG00000024422.10	7.41261e-21	-0.95061	1.23957e-22
ENSG00000127528.5	7.46455e-21	-0.969492	1.24955e-22
ENSG00000148082.8	8.06955e-21	-0.945731	1.35361e-22
ENSG00000162614.17	8.06955e-21	-0.822747	1.35312e-22
ENSG00000108395.12	8.32985e-21	0.657564	1.39871e-22
ENSG00000117245.11	8.4135e-21	-0.465357	1.4142e-22
ENSG00000151414.13	8.70973e-21	-0.637605	1.4655e-22
ENSG00000107815.6	8.74232e-21	0.723333	1.47249e-22
ENSG00000071539.12	8.81567e-21	0.976683	1.48637e-22
ENSG00000154258.15	9.13182e-21	-0.584508	1.54125e-22
ENSG00000119888.9	9.24804e-21	0.75004	1.56246e-22
ENSG00000165092.11	9.4734e-21	-1.02344	1.60217e-22
ENSG00000111412.5	9.54699e-21	-0.655948	1.61626e-22
ENSG00000183317.15	1.02341e-20	0.77757	1.73436e-22
ENSG00000123094.14	1.03427e-20	-0.770093	1.75455e-22
ENSG00000000460.15	1.03763e-20	0.629907	1.76204e-22
ENSG00000160606.9	1.05978e-20	0.943894	1.80148e-22
ENSG00000166106.3	1.0874e-20	-0.675748	1.8503e-22
ENSG00000143476.16	1.09409e-20	0.838112	1.86358e-22
ENSG00000141198.12	1.14014e-20	0.696182	1.94399e-22
ENSG00000109339.17	1.14062e-20	-0.582797	1.94676e-22
ENSG00000135929.7	1.15264e-20	-1.04125	1.96926e-22
ENSG00000105131.6	1.22287e-20	0.939807	2.09137e-22
ENSG00000164818.14	1.24663e-20	0.669254	2.13416e-22
ENSG00000123415.13	1.2793e-20	0.682496	2.19229e-22
ENSG00000144278.13	1.29053e-20	-0.547252	2.21376e-22
ENSG00000164631.17	1.3104e-20	0.64958	2.2501e-22
ENSG00000039523.16	1.32776e-20	-0.75834	2.28221e-22
ENSG00000159166.12	1.53043e-20	0.925645	2.63321e-22
ENSG00000179051.12	1.53801e-20	0.727705	2.6489e-22
ENSG00000163082.9	1.54472e-20	0.806938	2.66313e-22
ENSG00000106367.12	1.65166e-20	0.687185	2.85035e-22
ENSG00000068831.17	1.67007e-20	-0.669539	2.885e-22
ENSG00000138434.15	1.68799e-20	-0.74383	2.91887e-22
ENSG00000163472.17	1.72506e-20	0.691209	2.98594e-22
ENSG00000116147.15	1.73643e-20	-0.446412	3.00863e-22
ENSG00000166523.6	1.76713e-20	-0.612926	3.06486e-22
ENSG00000125630.14	1.77099e-20	0.620434	3.07462e-22
ENSG00000102030.14	1.86295e-20	0.689213	3.23749e-22
ENSG00000103811.14	1.88723e-20	-2.86235	3.28294e-22
ENSG00000119411.10	1.92307e-20	0.631902	3.3486e-22
ENSG00000128918.13	2.01819e-20	-0.718391	3.51772e-22
ENSG00000197879.13	2.0186e-20	-0.706637	3.52191e-22
ENSG00000204577.10	2.08092e-20	-0.624521	3.63423e-22
ENSG00000168389.16	2.16376e-20	-1.04581	3.78265e-22
ENSG00000050344.8	2.18079e-20	0.691209	3.81618e-22
ENSG00000188015.8	2.24384e-20	-0.480437	3.93038e-22
ENSG00000117385.14	2.28388e-20	0.696182	4.00446e-22
ENSG00000181409.10	2.43141e-20	-1.07249	4.26732e-22
ENSG00000186493.10	2.5506e-20	-0.621321	4.48092e-22
ENSG00000121797.9	2.64296e-20	-0.703818	4.64773e-22
ENSG00000136155.15	2.65215e-20	-1.11624	4.66847e-22
ENSG00000135750.13	2.66894e-20	0.60735	4.70263e-22
ENSG00000132031.11	2.73129e-20	-0.954697	4.8172e-22
ENSG00000137364.4	2.76015e-20	0.659908	4.87287e-22
ENSG00000106484.13	2.82404e-20	0.737272	4.99054e-22
ENSG00000152256.12	2.83529e-20	0.733851	5.01531e-22
ENSG00000108370.14	2.84934e-20	-0.397434	5.05491e-22
ENSG00000108381.9	2.84934e-20	-0.397434	5.05491e-22
ENSG00000198087.7	2.84934e-20	0.689846	5.04849e-22
ENSG00000110400.9	2.90229e-20	0.736068	5.15387e-22
ENSG00000163637.10	2.93513e-20	-0.7885	5.21724e-22
ENSG00000169750.7	2.94574e-20	0.807477	5.24118e-22
ENSG00000019186.8	3.01511e-20	1.4243	5.36982e-22
ENSG00000211892.3	3.1073e-20	1.76636	5.53936e-22
ENSG00000248801.5	3.2362e-20	-0.663298	5.77473e-22
ENSG00000160214.11	3.25872e-20	0.635134	5.82056e-22
ENSG00000102890.13	3.287e-20	0.670268	5.87673e-22
ENSG00000149435.11	3.41376e-20	-0.96531	6.10926e-22
ENSG00000144591.16	3.453e-20	0.63846	6.18544e-22
ENSG00000005075.14	3.71681e-20	0.655695	6.66442e-22
ENSG00000138778.10	3.71887e-20	0.742056	6.67454e-22
ENSG00000111816.7	3.80571e-20	0.65769	6.84353e-22
ENSG00000134531.8	3.80571e-20	-1.43178	6.83984e-22
ENSG00000111669.13	3.90107e-20	0.737684	7.02174e-22
ENSG00000138639.16	3.93682e-20	-0.790242	7.09287e-22
ENSG00000148053.14	4.04457e-20	-0.888611	7.29399e-22
ENSG00000160883.9	4.23112e-20	-1.03463	7.63772e-22
ENSG00000012171.16	4.23282e-20	-1.16816	7.64809e-22
ENSG00000140297.11	4.28571e-20	1.26903	7.75105e-22
ENSG00000130518.15	4.47661e-20	-0.96664	8.10403e-22
ENSG00000257727.4	4.58803e-20	0.645113	8.31365e-22
ENSG00000163468.13	4.64065e-20	0.775004	8.41702e-22
ENSG00000239998.4	4.75118e-20	-0.517472	8.62568e-22
ENSG00000162511.7	4.83346e-20	-1.05262	8.7834e-22
ENSG00000143740.13	4.87773e-20	0.630635	8.87228e-22
ENSG00000143850.11	4.9355e-20	0.777063	8.98587e-22
ENSG00000162616.8	5.14671e-20	-0.75362	9.3793e-22
ENSG00000021852.11	5.19857e-20	-0.712625	9.49175e-22
ENSG00000172292.13	5.19857e-20	0.624046	9.49016e-22
ENSG00000165905.15	5.42602e-20	1.12257	9.91639e-22
ENSG00000185298.11	5.63433e-20	0.605734	1.03068e-21
ENSG00000132965.8	5.68075e-20	-1.06662	1.04015e-21
ENSG00000120334.14	6.35472e-20	0.618692	1.16466e-21
ENSG00000144791.8	6.59509e-20	-0.696911	1.20985e-21
ENSG00000136167.12	6.60882e-20	-0.980802	1.21351e-21
ENSG00000069535.13	6.83973e-20	-0.935942	1.25709e-21
ENSG00000049541.9	6.85743e-20	0.639126	1.26152e-21
ENSG00000185090.13	7.09169e-20	0.939173	1.30584e-21
ENSG00000048028.10	7.57817e-20	0.629907	1.39673e-21
ENSG00000151503.11	7.71004e-20	0.633518	1.42236e-21
ENSG00000066735.13	7.91939e-20	-0.600222	1.46235e-21
ENSG00000171488.13	7.95096e-20	-0.75438	1.46955e-21
ENSG00000155846.15	8.49813e-20	-0.700554	1.57215e-21
ENSG00000146918.18	8.61664e-20	0.741708	1.59556e-21
ENSG00000007129.16	8.65984e-20	-0.518327	1.60506e-21
ENSG00000172752.13	8.71407e-20	-0.674006	1.61661e-21
ENSG00000095637.19	8.73818e-20	-0.781689	1.62259e-21
ENSG00000135775.12	9.05355e-20	0.595723	1.68272e-21
ENSG00000196730.11	9.18534e-20	-0.764359	1.7088e-21
ENSG00000162961.12	9.20013e-20	0.640583	1.71314e-21
ENSG00000162896.5	9.34945e-20	-2.55647	1.74256e-21
ENSG00000182195.7	9.41069e-20	0.421923	1.75559e-21
ENSG00000100281.12	9.68923e-20	0.611088	1.80923e-21
ENSG00000119812.17	9.71793e-20	0.591858	1.81626e-21
ENSG00000136518.15	9.76175e-20	0.588975	1.82614e-21
ENSG00000102804.13	9.93638e-20	-0.717725	1.86052e-21
ENSG00000103485.16	1.01415e-19	0.586916	1.90068e-21
ENSG00000101194.16	1.03681e-19	1.04758	1.94494e-21
ENSG00000117475.12	1.05293e-19	0.618565	1.97699e-21
ENSG00000204301.6	1.06974e-19	-0.862823	2.01041e-21
ENSG00000154319.13	1.08506e-19	-1.04644	2.04106e-21
ENSG00000143382.12	1.096e-19	-0.943323	2.06353e-21
ENSG00000138095.17	1.11417e-19	0.667765	2.09967e-21
ENSG00000171163.14	1.2385e-19	0.864724	2.3361e-21
ENSG00000105699.15	1.27753e-19	0.762078	2.41192e-21
ENSG00000111300.8	1.27965e-19	0.605481	2.41813e-21
ENSG00000166912.15	1.3181e-19	-0.648471	2.49307e-21
ENSG00000154760.12	1.35159e-19	0.901822	2.55875e-21
ENSG00000204175.5	1.39143e-19	-0.85674	2.63657e-21
ENSG00000196465.9	1.43843e-19	0.645113	2.72812e-21
ENSG00000157168.17	1.59012e-19	-0.552732	3.01856e-21
ENSG00000068438.13	1.60094e-19	0.64844	3.04187e-21
ENSG00000280339.1	1.60768e-19	-0.405037	3.05744e-21
ENSG00000172260.12	1.81039e-19	-0.679867	3.44608e-21
ENSG00000279117.1	1.85067e-19	-0.974592	3.52594e-21
ENSG00000183615.5	1.87797e-19	-0.584888	3.58118e-21
ENSG00000100307.11	1.93873e-19	-0.751909	3.70039e-21
ENSG00000006747.13	2.07461e-19	0.358625	3.96333e-21
ENSG00000158089.13	2.08044e-19	0.970093	3.97807e-21
ENSG00000116473.13	2.23556e-19	-0.603833	4.27852e-21
ENSG00000139970.15	2.23947e-19	-0.731728	4.28989e-21
ENSG00000049759.15	2.27873e-19	-0.745192	4.36901e-21
ENSG00000136270.12	2.3098e-19	0.671472	4.43257e-21
ENSG00000170632.12	2.34316e-19	0.668145	4.50064e-21
ENSG00000106004.4	2.37358e-19	-0.728465	4.56316e-21
ENSG00000159433.10	2.42221e-19	-0.876445	4.66083e-21
ENSG00000183801.6	2.47279e-19	-0.797054	4.76243e-21
ENSG00000179348.10	2.48064e-19	-0.909869	4.78611e-21
ENSG00000248890.1	2.48064e-19	-0.536037	4.78353e-21
ENSG00000171631.13	2.54389e-19	0.921242	4.91252e-21
ENSG00000213186.6	2.56404e-19	0.657817	4.95587e-21
ENSG00000106123.10	2.63451e-19	-0.620054	5.09661e-21
ENSG00000163235.14	2.74478e-19	0.538444	5.31467e-21
ENSG00000141279.14	2.75206e-19	0.627911	5.33353e-21
ENSG00000074800.12	2.87949e-19	0.143862	5.59043e-21
ENSG00000164850.13	2.87949e-19	-0.661904	5.58777e-21
ENSG00000103356.14	2.9041e-19	0.62978	5.64321e-21
ENSG00000231074.7	2.91055e-19	0.583178	5.66078e-21
ENSG00000112139.13	2.91072e-19	-0.82544	5.66612e-21
ENSG00000173599.12	3.06991e-19	0.761635	5.98131e-21
ENSG00000205364.3	3.1229e-19	-0.757991	6.08994e-21
ENSG00000168496.3	3.13152e-19	0.728117	6.11215e-21
ENSG00000119865.7	3.33878e-19	-0.643498	6.52246e-21
ENSG00000244482.8	3.34558e-19	-0.575289	6.54151e-21
ENSG00000106355.8	3.37985e-19	0.662918	6.61435e-21
ENSG00000160124.8	3.44451e-19	0.697165	6.74683e-21
ENSG00000114993.14	3.4457e-19	0.662664	6.75511e-21
ENSG00000109667.10	3.49696e-19	-0.584888	6.86163e-21
ENSG00000090382.5	3.51476e-19	-2.89149	6.90264e-21
ENSG00000176444.17	3.6078e-19	0.671123	7.09157e-21
ENSG00000070669.15	3.66884e-19	0.708665	7.2179e-21
ENSG00000145284.10	3.67808e-19	-0.961603	7.24241e-21
ENSG00000235505.6	3.70951e-19	-0.560209	7.3107e-21
ENSG00000178695.5	3.76631e-19	-0.774624	7.42915e-21
ENSG00000196684.11	3.94537e-19	0.837447	7.78915e-21
ENSG00000170633.15	3.98796e-19	0.612704	7.88013e-21
ENSG00000114353.15	4.0416e-19	-0.654079	7.99309e-21
ENSG00000127564.15	4.06959e-19	0.719626	8.05547e-21
ENSG00000119147.8	4.08225e-19	-0.571297	8.08757e-21
ENSG00000087274.15	4.08682e-19	-0.580263	8.10367e-21
ENSG00000146757.12	4.15704e-19	0.67125	8.25008e-21
ENSG00000129521.12	4.27056e-19	1.25078	8.48276e-21
ENSG00000164638.9	4.40686e-19	1.05021	8.7611e-21
ENSG00000116698.19	4.41438e-19	0.588658	8.78366e-21
ENSG00000198937.8	4.54725e-19	0.758593	9.05588e-21
ENSG00000131876.15	4.55287e-19	0.590654	9.07494e-21
ENSG00000151208.15	4.63121e-19	0.713005	9.23909e-21
ENSG00000197381.14	4.72099e-19	-0.761128	9.42634e-21
ENSG00000136643.10	4.89779e-19	0.605354	9.78781e-21
ENSG00000113389.14	4.89965e-19	-0.994393	9.79998e-21
ENSG00000177119.14	4.9582e-19	-0.657184	9.92565e-21
ENSG00000184363.8	5.10349e-19	0.774275	1.02253e-20
ENSG00000147027.3	5.10613e-19	-0.844353	1.02394e-20
ENSG00000105185.10	5.18044e-19	0.684207	1.03974e-20
ENSG00000112936.17	5.21807e-19	-1.41137	1.04819e-20
ENSG00000185008.16	5.26769e-19	-0.863583	1.05907e-20
ENSG00000253729.6	5.2925e-19	0.793601	1.06497e-20
ENSG00000130305.15	5.30896e-19	0.620687	1.0692e-20
ENSG00000116128.8	5.50518e-19	0.725709	1.10966e-20
ENSG00000134532.14	5.7334e-19	-0.486298	1.15665e-20
ENSG00000117758.12	5.77179e-19	-0.554221	1.16602e-20
ENSG00000165802.18	5.77179e-19	0.706764	1.16639e-20
ENSG00000056998.17	5.86458e-19	0.764359	1.18615e-20
ENSG00000148541.11	6.04043e-19	-0.488167	1.22276e-20
ENSG00000107736.18	6.0446e-19	-0.636496	1.22465e-20
ENSG00000119280.15	6.06134e-19	-0.738223	1.22909e-20
ENSG00000151490.12	6.10249e-19	-0.695961	1.23849e-20
ENSG00000197646.7	6.71334e-19	-0.62167	1.36361e-20
ENSG00000067057.15	6.78996e-19	0.991193	1.38152e-20
ENSG00000105829.10	6.78996e-19	0.669159	1.38074e-20
ENSG00000130522.5	7.01311e-19	-0.970537	1.42813e-20
ENSG00000132170.18	7.05625e-19	-0.961983	1.43814e-20
ENSG00000204394.11	7.40057e-19	0.704926	1.50959e-20
ENSG00000167874.6	7.78084e-19	-0.456011	1.5885e-20
ENSG00000134352.18	8.46898e-19	-0.667258	1.73045e-20
ENSG00000171943.10	8.9376e-19	-0.604214	1.82775e-20
ENSG00000189159.14	9.05728e-19	0.826929	1.85378e-20
ENSG00000183520.10	9.31951e-19	0.638492	1.90906e-20
ENSG00000197265.7	9.56291e-19	0.60735	1.96057e-20
ENSG00000099204.17	9.61095e-19	-0.857754	1.97208e-20
ENSG00000115806.11	9.67163e-19	0.633867	1.9862e-20
ENSG00000138594.11	9.77027e-19	-0.598004	2.00814e-20
ENSG00000137962.11	9.84025e-19	-0.716712	2.02423e-20
ENSG00000173210.18	9.9811e-19	-0.90179	2.05492e-20
ENSG00000130635.14	1.00049e-18	1.14541	2.06154e-20
ENSG00000137124.6	1.0106e-18	0.676129	2.08413e-20
ENSG00000105486.12	1.01711e-18	0.622303	2.10056e-20
ENSG00000148334.13	1.01711e-18	0.616917	2.10106e-20
ENSG00000163781.11	1.02083e-18	0.641217	2.11051e-20
ENSG00000129451.10	1.03303e-18	-0.682782	2.13751e-20
ENSG00000132688.10	1.03565e-18	-0.900269	2.14472e-20
ENSG00000165795.19	1.04713e-18	-0.878441	2.1703e-20
ENSG00000136731.11	1.07504e-18	0.603738	2.23e-20
ENSG00000143443.9	1.08091e-18	0.713765	2.24405e-20
ENSG00000163535.16	1.08235e-18	0.635514	2.2489e-20
ENSG00000089250.17	1.10695e-18	-0.477079	2.30337e-20
ENSG00000204839.7	1.10695e-18	1.0595	2.30383e-20
ENSG00000188322.4	1.11236e-18	1.08595	2.31702e-20
ENSG00000109743.9	1.13147e-18	-0.590021	2.35878e-20
ENSG00000110628.12	1.15367e-18	0.662189	2.40705e-20
ENSG00000127920.5	1.15773e-18	-0.956312	2.41751e-20
ENSG00000198938.2	1.17253e-18	-4.91624	2.45043e-20
ENSG00000158125.8	1.17655e-18	0.958879	2.46088e-20
ENSG00000066468.19	1.17891e-18	-0.963504	2.46785e-20
ENSG00000138376.9	1.18316e-18	0.667131	2.47879e-20
ENSG00000172236.15	1.23483e-18	-1.00969	2.58918e-20
ENSG00000256525.5	1.26998e-18	0.69444	2.66507e-20
ENSG00000138182.13	1.28321e-18	0.744274	2.69504e-20
ENSG00000197959.12	1.37356e-18	-0.537431	2.88715e-20
ENSG00000185303.14	1.5149e-18	-6.21121	3.18686e-20
ENSG00000167112.9	1.53358e-18	0.649073	3.22882e-20
ENSG00000198668.9	1.59118e-18	-0.525234	3.35283e-20
ENSG00000183248.10	1.64457e-18	0.981784	3.46817e-20
ENSG00000164877.17	1.67007e-18	0.778806	3.52483e-20
ENSG00000143748.16	1.68015e-18	0.575828	3.549e-20
ENSG00000150753.10	1.69029e-18	0.775162	3.57333e-20
ENSG00000110841.12	1.75973e-18	-0.593949	3.72317e-20
ENSG00000142632.15	1.81886e-18	0.688484	3.85142e-20
ENSG00000240972.1	1.87958e-18	0.666149	3.98323e-20
ENSG00000161800.11	1.99308e-18	0.65259	4.22721e-20
ENSG00000101608.11	2.03981e-18	-0.63713	4.32982e-20
ENSG00000149418.9	2.08538e-18	0.833835	4.43017e-20
ENSG00000018408.13	2.14539e-18	-0.670521	4.56136e-20
ENSG00000169255.12	2.17043e-18	-0.834849	4.61834e-20
ENSG00000140832.8	2.17614e-18	0.763187	4.63425e-20
ENSG00000165209.17	2.17633e-18	0.613813	4.6384e-20
ENSG00000182134.14	2.19825e-18	0.643371	4.68892e-20
ENSG00000062038.12	2.20579e-18	1.26555	4.7088e-20
ENSG00000042429.9	2.26928e-18	0.594012	4.84825e-20
ENSG00000181924.6	2.27815e-18	0.669	4.87114e-20
ENSG00000170779.10	2.29329e-18	0.751972	4.90747e-20
ENSG00000018280.15	2.43095e-18	-0.963789	5.20624e-20
ENSG00000112367.9	2.51185e-18	-0.611437	5.38383e-20
ENSG00000162817.6	2.5999e-18	-0.85259	5.57706e-20
ENSG00000106537.7	2.60519e-18	-0.719975	5.5929e-20
ENSG00000203668.1	2.63947e-18	0.695707	5.67104e-20
ENSG00000137168.7	2.7602e-18	0.66466	5.93519e-20
ENSG00000177084.15	2.77482e-18	0.65693	5.97143e-20
ENSG00000204262.10	2.82524e-18	1.08414	6.0848e-20
ENSG00000107317.10	2.892e-18	-1.14554	6.23357e-20
ENSG00000166451.12	2.90332e-18	0.657817	6.26298e-20
ENSG00000196154.10	2.91855e-18	-1.00817	6.30087e-20
ENSG00000122643.17	3.03947e-18	0.633391	6.56718e-20
ENSG00000189057.9	3.05035e-18	0.685981	6.59594e-20
ENSG00000047230.13	3.20536e-18	0.599747	6.93666e-20
ENSG00000175376.7	3.22933e-18	0.595755	6.99412e-20
ENSG00000118246.12	3.29558e-18	0.615428	7.14329e-20
ENSG00000119139.15	3.29785e-18	-0.641977	7.15389e-20
ENSG00000131037.13	3.31923e-18	0.536068	7.20601e-20
ENSG00000162551.12	3.41264e-18	-1.35729	7.41469e-20
ENSG00000247626.4	3.43608e-18	0.642484	7.47153e-20
ENSG00000130755.11	3.48436e-18	-0.832283	7.58254e-20
ENSG00000147251.14	3.50748e-18	-0.687977	7.63891e-20
ENSG00000160818.15	3.513e-18	0.6198	7.65699e-20
ENSG00000108379.8	3.52858e-18	0.680374	7.69704e-20
ENSG00000142207.6	3.53121e-18	0.634595	7.70888e-20
ENSG00000163406.9	3.56026e-18	-0.888611	7.77843e-20
ENSG00000166140.16	3.5721e-18	0.64996	7.81046e-20
ENSG00000172005.9	3.57435e-18	-0.589514	7.82154e-20
ENSG00000117834.11	3.73719e-18	-0.590116	8.18434e-20
ENSG00000047644.16	3.75382e-18	-0.707271	8.22762e-20
ENSG00000144524.16	3.75382e-18	0.613433	8.2337e-20
ENSG00000205336.10	3.89379e-18	0.751022	8.54745e-20
ENSG00000170417.13	3.93818e-18	0.564486	8.65168e-20
ENSG00000232677.5	3.9785e-18	1.00684	8.74712e-20
ENSG00000186185.12	4.04629e-18	0.758879	8.90316e-20
ENSG00000120693.12	4.05215e-18	-0.811247	8.92303e-20
ENSG00000101104.11	4.06717e-18	0.994583	8.96314e-20
ENSG00000105383.13	4.07155e-18	-0.631269	8.9798e-20
ENSG00000165140.8	4.28179e-18	-1.15495	9.45087e-20
ENSG00000125845.6	4.34844e-18	-1.04999	9.6055e-20
ENSG00000169302.13	4.34918e-18	0.976049	9.61464e-20
ENSG00000185515.13	4.35727e-18	0.614827	9.64005e-20
ENSG00000143742.11	4.35902e-18	0.641217	9.65145e-20
ENSG00000163131.9	4.39609e-18	-0.848598	9.7411e-20
ENSG00000267795.4	4.49932e-18	0.944084	9.97761e-20
ENSG00000127952.15	4.53862e-18	0.690955	1.00726e-19
ENSG00000162878.11	4.55747e-18	-0.86051	1.01223e-19
ENSG00000143256.4	4.62281e-18	0.649929	1.02783e-19
ENSG00000168874.11	4.62281e-18	-1.22671	1.02834e-19
ENSG00000196611.4	4.64492e-18	1.45905	1.03406e-19
ENSG00000149428.17	4.649e-18	0.699129	1.03577e-19
ENSG00000127990.14	4.71468e-18	-0.740694	1.05121e-19
ENSG00000198301.10	4.89967e-18	0.608839	1.09331e-19
ENSG00000069122.17	4.97206e-18	-1.01207	1.11032e-19
ENSG00000240184.5	5.00643e-18	-0.824014	1.11886e-19
ENSG00000146038.10	5.04233e-18	-0.54665	1.12775e-19
ENSG00000151806.12	5.07291e-18	0.575574	1.13546e-19
ENSG00000121361.3	5.13239e-18	-0.815017	1.14966e-19
ENSG00000102934.8	5.17411e-18	-0.893236	1.1599e-19
ENSG00000164530.12	5.29968e-18	-0.531285	1.18897e-19
ENSG00000173198.5	5.31951e-18	-0.504166	1.19433e-19
ENSG00000108387.13	5.34259e-18	-0.740599	1.20044e-19
ENSG00000182173.11	5.66131e-18	0.636243	1.27303e-19
ENSG00000119508.16	5.75832e-18	-1.17393	1.29583e-19
ENSG00000108342.11	6.17103e-18	-0.959385	1.38978e-19
ENSG00000109881.15	6.18728e-18	0.705782	1.3945e-19
ENSG00000174804.3	6.25123e-18	-0.779471	1.40999e-19
ENSG00000116478.10	6.28835e-18	0.621923	1.41945e-19
ENSG00000124191.16	6.50922e-18	-0.718391	1.47043e-19
ENSG00000108559.10	6.55424e-18	0.630255	1.48173e-19
ENSG00000149260.13	6.81735e-18	0.778077	1.54239e-19
ENSG00000085514.14	6.96637e-18	-0.794202	1.57731e-19
ENSG00000162073.12	6.99841e-18	0.790369	1.58577e-19
ENSG00000196396.8	7.05397e-18	-0.642737	1.59958e-19
ENSG00000143315.6	7.06412e-18	0.577824	1.6031e-19
ENSG00000062716.9	7.10431e-18	0.800697	1.61344e-19
ENSG00000170776.18	7.37863e-18	-0.664755	1.67702e-19
ENSG00000006740.15	7.48707e-18	-0.820434	1.70296e-19
ENSG00000064763.9	7.50201e-18	-0.607984	1.70765e-19
ENSG00000169894.16	7.65918e-18	1.27664	1.74475e-19
ENSG00000170439.6	7.81619e-18	0.850341	1.78186e-19
ENSG00000117222.12	7.84602e-18	0.591129	1.79002e-19
ENSG00000188783.5	7.93627e-18	-1.06992	1.81198e-19
ENSG00000154370.12	8.01783e-18	0.620054	1.83198e-19
ENSG00000135540.10	8.02113e-18	-0.728972	1.83412e-19
ENSG00000099958.13	8.15698e-18	1.08991	1.86659e-19
ENSG00000135451.11	8.25234e-18	0.773832	1.88984e-19
ENSG00000144824.18	8.5817e-18	-0.712276	1.96675e-19
ENSG00000163013.10	8.6643e-18	0.810201	1.98717e-19
ENSG00000171241.7	8.71416e-18	0.663425	2.00011e-19
ENSG00000171067.9	8.81843e-18	0.634975	2.02556e-19
ENSG00000171051.7	8.9888e-18	-0.981403	2.06625e-19
ENSG00000123358.18	9.30157e-18	-1.59449	2.13975e-19
ENSG00000016402.11	9.30765e-18	-0.836179	2.14275e-19
ENSG00000065183.14	9.34117e-18	0.601964	2.15208e-19
ENSG00000196628.12	9.65705e-18	-0.634342	2.22653e-19
ENSG00000103175.9	9.70546e-18	-0.674386	2.23936e-19
ENSG00000101447.12	9.7214e-18	0.782671	2.24472e-19
ENSG00000101084.15	1.01916e-17	0.633645	2.35505e-19
ENSG00000160801.12	1.07106e-17	-0.492159	2.47682e-19
ENSG00000204397.6	1.10132e-17	-0.587296	2.54871e-19
ENSG00000080986.11	1.11812e-17	0.66729	2.58952e-19
ENSG00000006704.9	1.1397e-17	0.593886	2.64146e-19
ENSG00000149534.7	1.16762e-17	-0.698685	2.70819e-19
ENSG00000010278.10	1.21198e-17	-0.667163	2.81317e-19
ENSG00000163563.7	1.23172e-17	-0.874133	2.8611e-19
ENSG00000136052.8	1.23259e-17	0.635387	2.86525e-19
ENSG00000008323.14	1.26839e-17	0.779186	2.95065e-19
ENSG00000139343.9	1.30429e-17	0.647584	3.03643e-19
ENSG00000165215.6	1.31195e-17	0.938793	3.05652e-19
ENSG00000174944.7	1.33434e-17	-0.531918	3.111e-19
ENSG00000188706.11	1.35739e-17	0.746523	3.16707e-19
ENSG00000168488.17	1.36551e-17	0.653192	3.18838e-19
ENSG00000153071.13	1.38766e-17	-0.746143	3.2425e-19
ENSG00000158352.14	1.40308e-17	-0.862316	3.28094e-19
ENSG00000167123.17	1.40605e-17	0.808332	3.29031e-19
ENSG00000233476.3	1.44978e-17	-0.902012	3.39514e-19
ENSG00000103460.15	1.45132e-17	1.07001	3.40125e-19
ENSG00000137812.18	1.45795e-17	0.631776	3.41931e-19
ENSG00000109099.12	1.46803e-17	-0.710756	3.44549e-19
ENSG00000198952.8	1.51328e-17	0.655061	3.5543e-19
ENSG00000026508.15	1.55887e-17	-1.11408	3.66406e-19
ENSG00000140807.5	1.56918e-17	-0.740947	3.69102e-19
ENSG00000141497.12	1.59049e-17	-0.616442	3.74388e-19
ENSG00000198018.6	1.617e-17	0.694789	3.80907e-19
ENSG00000112149.8	1.66608e-17	-0.827689	3.92756e-19
ENSG00000075218.17	1.67753e-17	0.656075	3.95745e-19
ENSG00000157551.16	1.67863e-17	-1.22563	3.96295e-19
ENSG00000104413.14	1.70791e-17	0.613591	4.03501e-19
ENSG00000148158.15	1.71064e-17	-0.75362	4.04442e-19
ENSG00000131153.7	1.72527e-17	0.672897	4.08199e-19
ENSG00000164087.6	1.7516e-17	0.601869	4.14731e-19
ENSG00000006530.14	1.80044e-17	0.595882	4.26604e-19
ENSG00000169188.4	1.83671e-17	0.587771	4.35516e-19
ENSG00000174514.11	1.8803e-17	0.423919	4.46176e-19
ENSG00000088340.14	2.03114e-17	0.893458	4.8232e-19
ENSG00000129675.14	2.04665e-17	-0.661809	4.86356e-19
ENSG00000185565.10	2.05037e-17	-0.822873	4.87593e-19
ENSG00000088387.16	2.06543e-17	-0.677871	4.91533e-19
ENSG00000129467.12	2.09221e-17	-0.787328	4.98266e-19
ENSG00000278535.3	2.20927e-17	0.700048	5.26524e-19
ENSG00000165507.8	2.20932e-17	-1.07258	5.26918e-19
ENSG00000168393.11	2.31665e-17	0.658578	5.52916e-19
ENSG00000138442.8	2.33273e-17	0.57022	5.57157e-19
ENSG00000128641.16	2.33482e-17	-0.573135	5.58058e-19
ENSG00000105894.10	2.38994e-17	-0.524727	5.71646e-19
ENSG00000163975.10	2.396e-17	0.984667	5.7351e-19
ENSG00000012048.18	2.43332e-17	0.775796	5.82862e-19
ENSG00000161955.15	2.54053e-17	-0.713639	6.08981e-19
ENSG00000128039.9	2.61944e-17	0.844448	6.288e-19
ENSG00000154262.11	2.61944e-17	-0.601362	6.28616e-19
ENSG00000060718.17	2.63831e-17	1.35115	6.34343e-19
ENSG00000143977.12	2.63831e-17	0.669507	6.34599e-19
ENSG00000188761.10	2.63831e-17	0.766355	6.34696e-19
ENSG00000156787.15	2.70586e-17	0.598131	6.51879e-19
ENSG00000178078.10	2.70586e-17	0.598384	6.51879e-19
ENSG00000165152.7	2.7752e-17	-0.587169	6.69064e-19
ENSG00000154153.12	2.8219e-17	-0.903374	6.80809e-19
ENSG00000065534.17	2.82767e-17	-0.748551	6.82688e-19
ENSG00000104356.9	2.91702e-17	0.601616	7.04765e-19
ENSG00000104415.12	2.94884e-17	0.753018	7.12961e-19
ENSG00000090447.10	3.04918e-17	0.675843	7.38274e-19
ENSG00000143314.11	3.04918e-17	0.632093	7.37994e-19
ENSG00000136848.15	3.07826e-17	-0.67822	7.45845e-19
ENSG00000172731.12	3.15955e-17	0.638144	7.66088e-19
ENSG00000196247.10	3.16352e-17	0.685316	7.67595e-19
ENSG00000072401.13	3.17836e-17	0.584667	7.71745e-19
ENSG00000196511.12	3.24299e-17	-0.584033	7.87997e-19
ENSG00000144485.9	3.33848e-17	0.904673	8.11776e-19
ENSG00000181019.11	3.35377e-17	1.24591	8.16074e-19
ENSG00000164849.8	3.39433e-17	-0.318296	8.27114e-19
ENSG00000171596.6	3.39433e-17	-0.318296	8.27114e-19
ENSG00000161016.14	3.44437e-17	0.00478378	8.39901e-19
ENSG00000109458.7	3.50505e-17	-0.638999	8.55304e-19
ENSG00000099194.5	3.50689e-17	-1.63827	8.56359e-19
ENSG00000137203.9	3.64682e-17	0.818565	8.91156e-19
ENSG00000171155.7	3.68468e-17	0.623285	9.01045e-19
ENSG00000100968.12	3.68938e-17	0.601489	9.0283e-19
ENSG00000134954.13	3.88014e-17	-0.729986	9.50181e-19
ENSG00000092470.10	3.93842e-17	0.648091	9.65133e-19
ENSG00000106992.16	3.94595e-17	-0.802344	9.67659e-19
ENSG00000108651.8	3.96684e-17	0.49539	9.73467e-19
ENSG00000100908.12	4.02204e-17	0.667765	9.87707e-19
ENSG00000096696.12	4.06141e-17	1.1413	9.98076e-19
ENSG00000276180.1	4.06597e-17	0.739807	9.99897e-19
ENSG00000109906.12	4.07107e-17	-0.909805	1.00186e-18
ENSG00000171033.11	4.12856e-17	-0.545794	1.01672e-18
ENSG00000172590.17	4.13402e-17	0.666149	1.01877e-18
ENSG00000158793.12	4.27099e-17	0.608459	1.05326e-18
ENSG00000175711.7	4.29524e-17	0.614827	1.05998e-18
ENSG00000182389.17	4.3372e-17	-0.49067	1.07109e-18
ENSG00000007923.14	4.39794e-17	0.582417	1.08685e-18
ENSG00000115902.9	4.45485e-17	0.675368	1.10168e-18
ENSG00000126218.10	4.52913e-17	-0.447046	1.12083e-18
ENSG00000242732.4	4.55281e-17	-0.428037	1.12748e-18
ENSG00000205937.10	4.56118e-17	0.590401	1.13034e-18
ENSG00000196233.10	4.57681e-17	0.579313	1.135e-18
ENSG00000133488.13	4.59807e-17	-0.592872	1.14107e-18
ENSG00000196305.16	4.63885e-17	0.586662	1.15199e-18
ENSG00000124615.16	4.76235e-17	-0.74985	1.18348e-18
ENSG00000137747.13	4.7851e-17	0.593537	1.18996e-18
ENSG00000104763.16	4.93368e-17	-0.57757	1.22776e-18
ENSG00000137343.16	5.00298e-17	0.734548	1.24587e-18
ENSG00000133216.15	5.05447e-17	1.00542	1.25956e-18
ENSG00000182667.13	5.12938e-17	-0.643054	1.27911e-18
ENSG00000166920.9	5.13146e-17	1.29092	1.28052e-18
ENSG00000160767.19	5.24004e-17	0.606336	1.30852e-18
ENSG00000021574.10	5.71113e-17	0.586409	1.42714e-18
ENSG00000172009.13	6.10649e-17	0.601616	1.52699e-18
ENSG00000256612.6	6.17605e-17	-0.939807	1.54545e-18
ENSG00000119686.8	6.20017e-17	-0.723333	1.55256e-18
ENSG00000227057.6	6.48191e-17	0.491525	1.62422e-18
ENSG00000115942.7	6.54144e-17	0.579313	1.64027e-18
ENSG00000150977.10	6.70277e-17	-0.609473	1.68188e-18
ENSG00000173473.9	6.75675e-17	0.60697	1.69659e-18
ENSG00000206538.6	6.78771e-17	-0.806843	1.70554e-18
ENSG00000143228.11	6.94642e-17	0.697196	1.74662e-18
ENSG00000078401.6	7.04483e-17	-1.02981	1.77257e-18
ENSG00000151498.10	7.07785e-17	0.735055	1.7821e-18
ENSG00000156873.14	7.17987e-17	0.629273	1.80903e-18
ENSG00000163923.8	7.22161e-17	0.796008	1.82079e-18
ENSG00000145050.14	7.35718e-17	0.625091	1.85624e-18
ENSG00000104695.11	7.38753e-17	-0.602978	1.86518e-18
ENSG00000080608.9	7.4612e-17	0.566228	1.88507e-18
ENSG00000162631.17	7.58684e-17	-0.452653	1.91812e-18
ENSG00000117009.10	7.97827e-17	-0.562458	2.01846e-18
ENSG00000085265.9	7.97849e-17	-0.922319	2.01989e-18
ENSG00000120896.12	8.1201e-17	-0.714367	2.05714e-18
ENSG00000073150.12	8.38229e-17	0.824172	2.12501e-18
ENSG00000197496.5	8.49248e-17	0.285601	2.15441e-18
ENSG00000178999.11	8.68405e-17	0.743799	2.20451e-18
ENSG00000163072.13	8.76358e-17	-0.892666	2.22621e-18
ENSG00000082068.7	8.78903e-17	0.586536	2.23419e-18
ENSG00000006576.15	8.89451e-17	0.623539	2.26254e-18
ENSG00000032389.11	8.90119e-17	0.598258	2.26731e-18
ENSG00000184497.11	8.90119e-17	-0.558372	2.26683e-18
ENSG00000064999.13	8.90726e-17	-0.528909	2.27039e-18
ENSG00000162910.17	8.98949e-17	0.610962	2.29291e-18
ENSG00000072864.11	9.10082e-17	0.594519	2.32287e-18
ENSG00000103089.7	9.23032e-17	0.982037	2.35752e-18
ENSG00000160193.10	9.36838e-17	0.632504	2.3944e-18
ENSG00000160072.18	9.391e-17	0.774497	2.4018e-18
ENSG00000172264.15	9.4026e-17	-0.947632	2.40639e-18
ENSG00000101126.14	9.43758e-17	0.558752	2.41697e-18
ENSG00000173992.7	9.44463e-17	0.577063	2.4204e-18
ENSG00000235750.8	9.62046e-17	-0.565912	2.46712e-18
ENSG00000038295.6	9.82231e-17	-0.478821	2.52058e-18
ENSG00000242125.3	9.8904e-17	0.789324	2.53976e-18
ENSG00000118495.17	9.92183e-17	-0.800095	2.54955e-18
ENSG00000013588.5	1.00401e-16	-4.98264	2.58166e-18
ENSG00000027847.12	1.02933e-16	0.611088	2.64855e-18
ENSG00000118564.13	1.04048e-16	-0.582417	2.67904e-18
ENSG00000018625.13	1.04966e-16	-0.507239	2.70449e-18
ENSG00000175054.13	1.066e-16	0.580802	2.74843e-18
ENSG00000180879.12	1.13282e-16	0.768541	2.92265e-18
ENSG00000187479.5	1.16972e-16	-0.968383	3.01989e-18
ENSG00000133574.8	1.19687e-16	-0.734358	3.09203e-18
ENSG00000114698.13	1.20328e-16	-0.698812	3.11275e-18
ENSG00000128534.6	1.20328e-16	0.558752	3.11073e-18
ENSG00000163811.10	1.2096e-16	0.504736	3.1312e-18
ENSG00000000003.13	1.28364e-16	0.646919	3.32507e-18
ENSG00000151474.18	1.28765e-16	-0.656011	3.33768e-18
ENSG00000123146.18	1.2992e-16	-0.794804	3.36985e-18
ENSG00000178175.10	1.3341e-16	-0.38435	3.46268e-18
ENSG00000184992.10	1.38436e-16	0.605734	3.59552e-18
ENSG00000183605.15	1.47119e-16	0.678536	3.82357e-18
ENSG00000185414.18	1.47865e-16	0.575701	3.84553e-18
ENSG00000113504.18	1.62998e-16	0.736195	4.2419e-18
ENSG00000150764.12	1.65348e-16	-0.67597	4.30591e-18
ENSG00000161929.13	1.65365e-16	-0.676034	4.30921e-18
ENSG00000169607.11	1.69402e-16	0.626168	4.41731e-18
ENSG00000158315.9	1.70846e-16	0.655948	4.45793e-18
ENSG00000075702.15	1.71456e-16	0.715761	4.4768e-18
ENSG00000165410.13	1.72896e-16	-0.666308	4.5174e-18
ENSG00000010671.14	1.75465e-16	-0.786251	4.58754e-18
ENSG00000108469.13	1.92451e-16	0.633265	5.03496e-18
ENSG00000161921.13	1.95922e-16	-0.711072	5.12914e-18
ENSG00000185532.13	1.9695e-16	-0.769523	5.15945e-18
ENSG00000103710.9	2.04116e-16	-0.774149	5.35071e-18
ENSG00000070756.12	2.05121e-16	0.281831	5.38059e-18
ENSG00000137491.13	2.06182e-16	-0.873784	5.41198e-18
ENSG00000185033.13	2.1151e-16	0.806843	5.5555e-18
ENSG00000018236.13	2.11656e-16	-0.475875	5.56297e-18
ENSG00000182199.9	2.14148e-16	0.670806	5.63217e-18
ENSG00000163751.3	2.19588e-16	-1.02706	5.77904e-18
ENSG00000138769.9	2.21866e-16	-0.349279	5.84281e-18
ENSG00000170345.8	2.25781e-16	-2.69194	5.9498e-18
ENSG00000131370.14	2.25851e-16	-0.749596	5.95555e-18
ENSG00000131171.11	2.3055e-16	-0.55514	6.08343e-18
ENSG00000204536.12	2.33836e-16	0.645747	6.17419e-18
ENSG00000151632.15	2.34743e-16	0.623951	6.20217e-18
ENSG00000072274.11	2.48893e-16	-0.890163	6.58035e-18
ENSG00000106105.12	2.53758e-16	0.610962	6.71333e-18
ENSG00000108622.9	2.54333e-16	-0.696879	6.73295e-18
ENSG00000129538.12	2.55414e-16	-1.86035	6.76597e-18
ENSG00000133103.15	2.55965e-16	0.564233	6.78498e-18
ENSG00000071794.14	2.5725e-16	0.635229	6.82349e-18
ENSG00000103569.8	2.64465e-16	-0.93553	7.01942e-18
ENSG00000108829.9	2.64489e-16	0.598955	7.02461e-18
ENSG00000047849.20	2.7316e-16	-0.611057	7.25962e-18
ENSG00000013306.14	2.73499e-16	0.675115	7.27336e-18
ENSG00000198712.1	2.76955e-16	-4.85753	7.37004e-18
ENSG00000169972.10	2.7748e-16	0.678093	7.38881e-18
ENSG00000163629.11	2.80791e-16	-0.835102	7.48181e-18
ENSG00000228716.5	2.82092e-16	0.635863	7.52134e-18
ENSG00000133398.3	2.8298e-16	0.549533	7.54991e-18
ENSG00000111665.10	2.91182e-16	0.650467	7.77376e-18
ENSG00000123374.9	2.96893e-16	0.595501	7.93135e-18
ENSG00000166224.15	3.04251e-16	0.555267	8.13317e-18
ENSG00000138759.16	3.05291e-16	-0.882085	8.16624e-18
ENSG00000167962.11	3.14822e-16	0.562585	8.42662e-18
ENSG00000138092.9	3.22487e-16	0.639221	8.63734e-18
ENSG00000091844.6	3.22739e-16	0.685981	8.64966e-18
ENSG00000151914.16	3.25478e-16	-0.847521	8.72868e-18
ENSG00000063587.13	3.28608e-16	0.564359	8.8183e-18
ENSG00000243678.10	3.33826e-16	0.594583	8.96408e-18
ENSG00000029153.13	3.44066e-16	1.02911	9.24499e-18
ENSG00000053747.14	3.47378e-16	-0.93157	9.33997e-18
ENSG00000090615.11	3.67374e-16	0.612831	9.88397e-18
ENSG00000235173.5	3.80596e-16	0.641121	1.02463e-17
ENSG00000122852.13	3.86638e-16	-6.35701	1.04156e-17
ENSG00000152990.12	3.94067e-16	0.567464	1.06225e-17
ENSG00000116750.12	3.99638e-16	0.516585	1.07796e-17
ENSG00000182704.7	4.11531e-16	0.84882	1.11075e-17
ENSG00000101347.8	4.19544e-16	-0.716173	1.1331e-17
ENSG00000272734.1	4.20355e-16	-0.503026	1.13602e-17
ENSG00000185049.11	4.3179e-16	0.560969	1.16841e-17
ENSG00000189376.10	4.3179e-16	0.635134	1.16783e-17
ENSG00000256269.5	4.3749e-16	0.619325	1.18459e-17
ENSG00000234281.4	4.4047e-16	-0.329637	1.19342e-17
ENSG00000265107.2	4.45214e-16	-0.8556	1.20704e-17
ENSG00000211896.5	4.46401e-16	0.15023	1.21103e-17
ENSG00000123342.14	4.54927e-16	-0.93968	1.23494e-17
ENSG00000028528.13	4.68074e-16	-0.515888	1.27144e-17
ENSG00000204482.9	4.71199e-16	-0.869888	1.28074e-17
ENSG00000185482.6	4.72981e-16	-0.536037	1.2864e-17
ENSG00000147804.8	4.78672e-16	0.728338	1.30271e-17
ENSG00000158106.11	4.82466e-16	0.933882	1.31386e-17
ENSG00000164654.14	4.8278e-16	0.572945	1.31555e-17
ENSG00000146731.9	4.89089e-16	0.652907	1.33359e-17
ENSG00000119431.8	4.90563e-16	0.574212	1.33845e-17
ENSG00000184349.11	4.92408e-16	0.649358	1.34434e-17
ENSG00000177732.7	5.12685e-16	0.658578	1.40058e-17
ENSG00000243701.4	5.16437e-16	-0.425978	1.41172e-17
ENSG00000133808.4	5.44078e-16	-0.542658	1.48822e-17
ENSG00000109819.7	5.4887e-16	-0.385649	1.50227e-17
ENSG00000198252.10	5.57843e-16	0.571329	1.5278e-17
ENSG00000205581.9	5.60438e-16	0.62639	1.53587e-17
ENSG00000167757.12	5.7476e-16	-0.667607	1.57611e-17
ENSG00000134602.14	5.82221e-16	0.525107	1.59758e-17
ENSG00000113555.5	5.85332e-16	-0.754126	1.60712e-17
ENSG00000184182.17	6.01626e-16	0.58416	1.6529e-17
ENSG00000221829.8	6.0863e-16	0.612894	1.67319e-17
ENSG00000159596.6	6.15359e-16	0.534833	1.69275e-17
ENSG00000110195.10	6.25042e-16	-0.942943	1.72047e-17
ENSG00000131018.21	6.26078e-16	-0.825313	1.7244e-17
ENSG00000132313.13	6.28043e-16	0.582671	1.7309e-17
ENSG00000111962.7	6.28577e-16	-0.486361	1.73345e-17
ENSG00000079335.16	6.40845e-16	-0.538318	1.76853e-17
ENSG00000125872.7	6.40845e-16	-0.829115	1.7695e-17
ENSG00000180921.6	6.4272e-16	0.690227	1.77578e-17
ENSG00000162836.10	6.66264e-16	0.663203	1.84198e-17
ENSG00000084710.12	6.70764e-16	-0.614225	1.85558e-17
ENSG00000058600.14	6.73682e-16	0.545256	1.86481e-17
ENSG00000184156.14	6.74372e-16	0.947854	1.86789e-17
ENSG00000186907.6	6.81992e-16	0.762617	1.89017e-17
ENSG00000084453.15	6.87516e-16	-0.51272	1.90667e-17
ENSG00000077942.16	6.90499e-16	-0.99547	1.9172e-17
ENSG00000137441.7	6.90499e-16	-0.314557	1.91733e-17
ENSG00000244567.1	6.97843e-16	-0.557231	1.93892e-17
ENSG00000166313.17	6.98366e-16	-0.724727	1.94158e-17
ENSG00000136261.13	7.00725e-16	0.569745	1.94935e-17
ENSG00000141580.14	7.36515e-16	0.643973	2.05018e-17
ENSG00000163463.10	7.47524e-16	0.52536	2.08212e-17
ENSG00000136026.12	7.56833e-16	0.617931	2.10935e-17
ENSG00000037897.15	7.85548e-16	0.699857	2.19074e-17
ENSG00000161654.8	7.94382e-16	0.570062	2.21675e-17
ENSG00000133740.9	8.44304e-16	0.681451	2.35751e-17
ENSG00000177542.9	8.49469e-16	0.588658	2.3734e-17
ENSG00000198053.10	8.63773e-16	-0.739648	2.41486e-17
ENSG00000169258.6	8.87775e-16	0.611215	2.48349e-17
ENSG00000261716.1	9.43914e-16	0.709773	2.64216e-17
ENSG00000151012.12	9.51356e-16	1.14117	2.66464e-17
ENSG00000171793.12	9.64752e-16	0.61432	2.70382e-17
ENSG00000198502.5	9.7332e-16	-1.87001	2.72952e-17
ENSG00000112799.7	9.85923e-16	-0.708823	2.76656e-17
ENSG00000070526.13	9.86939e-16	0.88275	2.77111e-17
ENSG00000099899.13	1.00287e-15	0.579059	2.81758e-17
ENSG00000154146.11	1.03699e-15	-1.03441	2.91523e-17
ENSG00000171368.11	1.05889e-15	-0.952764	2.98044e-17
ENSG00000179044.14	1.05889e-15	-0.549628	2.97889e-17
ENSG00000118894.13	1.06851e-15	0.604467	3.00936e-17
ENSG00000148516.20	1.06973e-15	-0.663045	3.01465e-17
ENSG00000131355.13	1.07818e-15	-0.314557	3.04033e-17
ENSG00000148841.14	1.08525e-15	-0.684397	3.06213e-17
ENSG00000130768.13	1.0901e-15	0.861175	3.07771e-17
ENSG00000114491.12	1.12021e-15	0.564106	3.16465e-17
ENSG00000102359.5	1.18149e-15	0.988627	3.3398e-17
ENSG00000058799.12	1.18298e-15	0.575289	3.3481e-17
ENSG00000111452.11	1.18298e-15	-0.913797	3.34607e-17
ENSG00000132763.13	1.21844e-15	0.617678	3.45056e-17
ENSG00000135083.13	1.29427e-15	0.509393	3.66754e-17
ENSG00000114859.13	1.42744e-15	0.562617	4.04736e-17
ENSG00000122877.12	1.44051e-15	-0.842325	4.08691e-17
ENSG00000184730.9	1.45215e-15	-0.830635	4.12244e-17
ENSG00000153707.14	1.46377e-15	-0.549153	4.15795e-17
ENSG00000135912.9	1.46612e-15	0.558879	4.16717e-17
ENSG00000184428.11	1.51497e-15	0.555013	4.30863e-17
ENSG00000115419.11	1.57431e-15	-0.220687	4.48011e-17
ENSG00000139597.15	1.593e-15	-0.693901	4.5388e-17
ENSG00000172172.6	1.593e-15	0.633011	4.53786e-17
ENSG00000213626.10	1.59437e-15	-0.718422	4.54543e-17
ENSG00000166788.8	1.59735e-15	0.609948	4.55668e-17
ENSG00000112996.8	1.6891e-15	0.588753	4.82135e-17
ENSG00000164879.6	1.70659e-15	-0.558213	4.87421e-17
ENSG00000093009.8	1.79436e-15	0.624299	5.12798e-17
ENSG00000161692.16	1.80831e-15	0.59227	5.17097e-17
ENSG00000133316.14	1.83991e-15	0.51028	5.26451e-17
ENSG00000138193.13	1.84282e-15	-0.746016	5.27602e-17
ENSG00000128626.10	1.86471e-15	0.618692	5.34191e-17
ENSG00000119718.9	1.8754e-15	0.545541	5.37576e-17
ENSG00000166881.8	1.87876e-15	0.543799	5.38865e-17
ENSG00000127191.16	1.87941e-15	0.560748	5.39374e-17
ENSG00000198743.5	1.88536e-15	0.764454	5.41407e-17
ENSG00000141076.16	1.93628e-15	0.554475	5.56364e-17
ENSG00000159388.5	1.98868e-15	-1.03111	5.71762e-17
ENSG00000163686.12	1.99501e-15	-0.540314	5.73929e-17
ENSG00000100647.7	2.03263e-15	-0.581182	5.85102e-17
ENSG00000156697.11	2.04156e-15	0.495327	5.88025e-17
ENSG00000123989.12	2.10041e-15	0.642484	6.05605e-17
ENSG00000127249.13	2.10041e-15	-0.849485	6.05701e-17
ENSG00000090263.14	2.11854e-15	0.621796	6.11294e-17
ENSG00000104951.14	2.15635e-15	0.829019	6.22576e-17
ENSG00000167535.6	2.17268e-15	0.603485	6.27666e-17
ENSG00000101391.19	2.19898e-15	0.55476	6.35641e-17
ENSG00000060140.7	2.26856e-15	0.588785	6.56146e-17
ENSG00000171533.10	2.29191e-15	-0.679265	6.63296e-17
ENSG00000176945.15	2.30886e-15	0.959544	6.686e-17
ENSG00000080031.8	2.37913e-15	0.794393	6.89359e-17
ENSG00000125398.5	2.41247e-15	0.431174	6.99632e-17
ENSG00000173786.15	2.41247e-15	0.545794	6.99853e-17
ENSG00000064886.12	2.42694e-15	-1.03051	7.04467e-17
ENSG00000116649.8	2.45827e-15	0.590844	7.13986e-17
ENSG00000106771.11	2.46013e-15	-0.515634	7.14951e-17
ENSG00000122861.14	2.46953e-15	1.10325	7.18108e-17
ENSG00000110583.11	2.55109e-15	0.570093	7.42706e-17
ENSG00000138356.12	2.55109e-15	-0.809504	7.42276e-17
ENSG00000167642.11	2.55593e-15	0.643339	7.44557e-17
ENSG00000140030.5	2.59312e-15	-0.565722	7.56133e-17
ENSG00000174282.10	2.59312e-15	-0.53271	7.56286e-17
ENSG00000132470.12	2.70327e-15	0.826042	7.88876e-17
ENSG00000114021.10	2.76694e-15	0.593981	8.07936e-17
ENSG00000173930.8	2.86397e-15	-0.821765	8.36761e-17
ENSG00000149541.8	3.03827e-15	0.551117	8.8821e-17
ENSG00000169291.8	3.0683e-15	-0.765848	8.97519e-17
ENSG00000124786.9	3.06913e-15	0.516015	8.98293e-17
ENSG00000196159.10	3.13368e-15	-0.807192	9.17727e-17
ENSG00000135773.11	3.14377e-15	-0.395121	9.21225e-17
ENSG00000157368.9	3.15172e-15	-0.492539	9.24097e-17
ENSG00000087299.10	3.23285e-15	0.617551	9.48442e-17
ENSG00000150990.6	3.26715e-15	0.530588	9.59068e-17
ENSG00000171224.8	3.37533e-15	0.658546	9.91409e-17
ENSG00000187097.11	3.38064e-15	0.500935	9.93552e-17
ENSG00000146143.16	3.38982e-15	0.548107	9.96833e-17
ENSG00000205629.10	3.41495e-15	0.551022	1.00481e-16
ENSG00000215788.8	3.42205e-15	0.77681	1.00749e-16
ENSG00000182446.12	3.55563e-15	0.607065	1.04743e-16
ENSG00000204392.9	3.58749e-15	0.630635	1.05744e-16
ENSG00000050555.16	3.66898e-15	-0.89406	1.08209e-16
ENSG00000116455.12	3.76265e-15	0.534326	1.11037e-16
ENSG00000158186.11	3.87332e-15	-0.638365	1.14369e-16
ENSG00000184164.13	3.94032e-15	0.625503	1.16416e-16
ENSG00000024526.15	3.95499e-15	0.611215	1.17057e-16
ENSG00000162654.8	3.95499e-15	-0.888199	1.17122e-16
ENSG00000187134.11	3.95499e-15	0.0558847	1.17085e-16
ENSG00000253755.1	3.95499e-15	1.27394	1.1705e-16
ENSG00000123838.9	4.08827e-15	-1.47138	1.2114e-16
ENSG00000198915.10	4.19283e-15	0.702804	1.2431e-16
ENSG00000155465.17	4.20259e-15	-0.727641	1.24672e-16
ENSG00000139174.9	4.2316e-15	-0.608585	1.25606e-16
ENSG00000114354.11	4.29694e-15	0.567971	1.27619e-16
ENSG00000135845.8	4.42804e-15	0.585015	1.3159e-16
ENSG00000214708.4	4.45768e-15	-0.435577	1.32547e-16
ENSG00000134910.11	4.46056e-15	0.559449	1.3271e-16
ENSG00000126768.11	4.48071e-15	0.588246	1.33464e-16
ENSG00000160111.11	4.48071e-15	-0.961381	1.33425e-16
ENSG00000259974.2	4.4848e-15	-0.796325	1.33663e-16
ENSG00000196205.8	4.50761e-15	-0.936987	1.34421e-16
ENSG00000103202.11	4.57644e-15	0.685284	1.36552e-16
ENSG00000173641.16	4.59143e-15	-0.576176	1.37079e-16
ENSG00000128567.15	4.90856e-15	-0.647077	1.46632e-16
ENSG00000110422.10	4.94029e-15	-0.523238	1.47665e-16
ENSG00000145545.10	4.94251e-15	0.684017	1.47816e-16
ENSG00000164197.10	4.95143e-15	-0.53157	1.48169e-16
ENSG00000111581.8	4.97263e-15	0.588246	1.48889e-16
ENSG00000131788.14	5.01356e-15	0.578014	1.50201e-16
ENSG00000146842.15	5.19443e-15	0.565468	1.55709e-16
ENSG00000012174.10	5.27891e-15	0.513892	1.58333e-16
ENSG00000179958.7	5.29816e-15	0.631269	1.59001e-16
ENSG00000065457.9	5.39749e-15	0.485981	1.62076e-16
ENSG00000125247.14	5.40193e-15	0.58755	1.62302e-16
ENSG00000146376.9	5.40967e-15	-0.553208	1.62628e-16
ENSG00000102265.10	5.42395e-15	0.882655	1.63151e-16
ENSG00000108010.10	5.55676e-15	0.470078	1.67242e-16
ENSG00000151892.13	5.69885e-15	-0.608332	1.71617e-16
ENSG00000027697.11	5.81285e-15	-0.60076	1.7515e-16
ENSG00000111726.11	5.8197e-15	0.602598	1.75457e-16
ENSG00000079156.15	5.83412e-15	-0.688104	1.75992e-16
ENSG00000163214.19	5.83839e-15	0.551022	1.76222e-16
ENSG00000169504.13	6.08757e-15	-0.579629	1.83848e-16
ENSG00000104517.11	6.10314e-15	0.607603	1.84424e-16
ENSG00000140600.15	6.12655e-15	-0.269317	1.85237e-16
ENSG00000166012.13	6.16927e-15	0.548836	1.86635e-16
ENSG00000081041.8	6.1984e-15	-1.30027	1.87623e-16
ENSG00000124383.7	6.19913e-15	0.496024	1.87752e-16
ENSG00000181744.7	6.28158e-15	-0.628766	1.90358e-16
ENSG00000130699.15	6.28971e-15	0.521749	1.90712e-16
ENSG00000162174.11	6.38755e-15	-0.0844923	1.93789e-16
ENSG00000187908.14	6.54319e-15	-1.84084	1.98624e-16
ENSG00000116670.13	6.55806e-15	0.545794	1.99189e-16
ENSG00000075461.5	6.56455e-15	-0.764169	1.99612e-16
ENSG00000264538.5	6.56455e-15	0.56249	1.996e-16
ENSG00000118193.10	6.58621e-15	0.592523	2.00385e-16
ENSG00000254415.3	6.74657e-15	-0.551497	2.0538e-16
ENSG00000114270.14	6.76012e-15	0.930334	2.05909e-16
ENSG00000114166.7	6.99853e-15	-0.6294	2.13292e-16
ENSG00000111879.17	7.12421e-15	-0.748836	2.17245e-16
ENSG00000132603.12	7.12544e-15	0.582291	2.17406e-16
ENSG00000128594.6	7.45466e-15	-0.563124	2.27579e-16
ENSG00000260461.1	7.63116e-15	-0.538413	2.33099e-16
ENSG00000187531.12	7.78645e-15	0.537938	2.37977e-16
ENSG00000137274.11	7.80669e-15	0.636813	2.3873e-16
ENSG00000070182.16	8.01608e-15	1.00935	2.45272e-16
ENSG00000197982.13	8.23745e-15	0.604847	2.52187e-16
ENSG00000130176.6	8.2808e-15	-0.824616	2.53657e-16
ENSG00000163170.10	8.30967e-15	0.629115	2.54685e-16
ENSG00000159377.9	8.42324e-15	0.592333	2.58311e-16
ENSG00000105388.13	8.48659e-15	1.94842	2.604e-16
ENSG00000133835.13	8.50433e-15	-0.48785	2.61091e-16
ENSG00000159593.13	8.53806e-15	0.524442	2.62274e-16
ENSG00000130935.8	8.61185e-15	0.421733	2.6469e-16
ENSG00000206052.9	8.67605e-15	-0.481578	2.66813e-16
ENSG00000131016.15	9.08006e-15	-1.00019	2.79394e-16
ENSG00000146674.13	9.16315e-15	1.10417	2.82109e-16
ENSG00000124120.9	9.35856e-15	0.495454	2.88286e-16
ENSG00000187098.13	9.66424e-15	-0.709362	2.97869e-16
ENSG00000183309.10	9.7338e-15	0.572184	3.00181e-16
ENSG00000121578.11	9.76751e-15	0.558752	3.01389e-16
ENSG00000171302.15	9.81366e-15	0.543925	3.02983e-16
ENSG00000148339.11	9.8866e-15	-0.729352	3.05576e-16
ENSG00000171729.12	9.8866e-15	0.457817	3.0542e-16
ENSG00000153446.14	1.00632e-14	-0.832916	3.11207e-16
ENSG00000134815.17	1.00682e-14	0.570854	3.11537e-16
ENSG00000196329.9	1.03599e-14	-0.397687	3.20742e-16
ENSG00000101333.15	1.04828e-14	-0.433011	3.24727e-16
ENSG00000082397.14	1.0654e-14	-0.627911	3.30215e-16
ENSG00000112651.10	1.06557e-14	0.538318	3.30449e-16
ENSG00000129244.7	1.08827e-14	-0.382607	3.37677e-16
ENSG00000155330.8	1.08976e-14	0.545763	3.38327e-16
ENSG00000146223.13	1.10827e-14	0.519499	3.44268e-16
ENSG00000136522.12	1.10829e-14	0.549279	3.44465e-16
ENSG00000110172.10	1.1239e-14	0.5048	3.49511e-16
ENSG00000235385.1	1.12747e-14	-0.29387	3.50814e-16
ENSG00000160917.13	1.12938e-14	0.592523	3.51603e-16
ENSG00000157214.12	1.1306e-14	0.672169	3.52177e-16
ENSG00000100726.13	1.1421e-14	0.542405	3.55958e-16
ENSG00000111339.9	1.14823e-14	-0.344844	3.58263e-16
ENSG00000147113.15	1.14823e-14	-0.761318	3.58107e-16
ENSG00000066027.10	1.17409e-14	-0.571202	3.66535e-16
ENSG00000083857.12	1.23354e-14	0.734579	3.85308e-16
ENSG00000097046.11	1.24395e-14	0.601489	3.88775e-16
ENSG00000109107.12	1.24606e-14	0.345794	3.89648e-16
ENSG00000185624.13	1.26496e-14	0.382417	3.95777e-16
ENSG00000127334.10	1.26829e-14	0.590749	3.97038e-16
ENSG00000125538.10	1.27102e-14	-0.626422	3.98112e-16
ENSG00000187391.16	1.29067e-14	-0.534199	4.0449e-16
ENSG00000178878.11	1.3573e-14	-0.761983	4.25607e-16
ENSG00000163531.14	1.36213e-14	-0.739965	4.27355e-16
ENSG00000136630.12	1.37334e-14	-0.642642	4.31108e-16
ENSG00000186665.8	1.38493e-14	0.620402	4.34987e-16
ENSG00000153944.9	1.39304e-14	0.574751	4.37775e-16
ENSG00000124942.12	1.39537e-14	-5.12885	4.38748e-16
ENSG00000162747.8	1.41827e-14	-0.509108	4.46191e-16
ENSG00000104341.15	1.43409e-14	0.79246	4.51418e-16
ENSG00000150967.16	1.43653e-14	0.575574	4.52432e-16
ENSG00000118515.10	1.44995e-14	-0.910819	4.56911e-16
ENSG00000162390.16	1.46583e-14	0.555013	4.62166e-16
ENSG00000164111.13	1.47563e-14	-0.525107	4.6551e-16
ENSG00000182489.8	1.47636e-14	0.75514	4.65996e-16
ENSG00000155324.8	1.49731e-14	0.569713	4.72868e-16
ENSG00000146386.7	1.54466e-14	0.595375	4.88087e-16
ENSG00000162493.15	1.5735e-14	-0.740694	4.97472e-16
ENSG00000076604.13	1.61231e-14	0.598891	5.10022e-16
ENSG00000069667.14	1.62557e-14	-0.675368	5.14495e-16
ENSG00000026652.12	1.64487e-14	-0.49745	5.2117e-16
ENSG00000198131.12	1.64487e-14	0.49745	5.2117e-16
ENSG00000123136.13	1.70683e-14	0.60792	5.41097e-16
ENSG00000160179.17	1.718e-14	-0.694757	5.44934e-16
ENSG00000184905.7	1.72376e-14	-0.327895	5.4706e-16
ENSG00000163106.9	1.7372e-14	-0.517725	5.51626e-16
ENSG00000112742.8	1.74245e-14	0.583178	5.53593e-16
ENSG00000144815.13	1.74282e-14	-0.635736	5.54011e-16
ENSG00000260804.3	1.78512e-14	-0.498273	5.67765e-16
ENSG00000278619.3	1.84005e-14	0.573578	5.85554e-16
ENSG00000129993.13	1.8403e-14	-0.531696	5.8595e-16
ENSG00000115541.9	1.84494e-14	0.604277	5.87748e-16
ENSG00000143248.11	1.89698e-14	-0.762617	6.04655e-16
ENSG00000010244.15	1.90984e-14	0.51047	6.0941e-16
ENSG00000176014.11	1.90984e-14	-0.748361	6.09109e-16
ENSG00000112029.8	1.93809e-14	0.534326	6.18761e-16
ENSG00000101181.16	1.97716e-14	0.562237	6.31574e-16
ENSG00000119326.13	1.98178e-14	-0.604023	6.33394e-16
ENSG00000231389.6	2.00377e-14	-2.93303	6.40765e-16
ENSG00000189221.8	2.02645e-14	-0.735593	6.48368e-16
ENSG00000105655.17	2.04255e-14	0.625281	6.53872e-16
ENSG00000104964.13	2.06482e-14	-0.634754	6.61357e-16
ENSG00000122882.9	2.21724e-14	0.544527	7.10561e-16
ENSG00000107438.7	2.23654e-14	-0.606019	7.17133e-16
ENSG00000136243.15	2.25551e-14	0.506669	7.23604e-16
ENSG00000136295.13	2.2877e-14	0.751529	7.34324e-16
ENSG00000013573.15	2.36154e-14	0.71668	7.58434e-16
ENSG00000108883.11	2.36596e-14	0.556376	7.60262e-16
ENSG00000140450.8	2.39377e-14	-0.666783	7.69612e-16
ENSG00000124831.17	2.45765e-14	-0.477174	7.90572e-16
ENSG00000132698.12	2.46144e-14	0.57022	7.92217e-16
ENSG00000108946.13	2.4697e-14	-0.498305	7.95302e-16
ENSG00000145569.5	2.51761e-14	-0.777222	8.11165e-16
ENSG00000030110.11	2.59597e-14	0.565595	8.36859e-16
ENSG00000166347.17	2.59675e-14	-0.816632	8.37559e-16
ENSG00000011600.10	2.62726e-14	-0.857437	8.47854e-16
ENSG00000165055.14	2.64227e-14	0.493458	8.53155e-16
ENSG00000126953.5	2.67691e-14	0.482243	8.64802e-16
ENSG00000108256.7	2.72012e-14	0.621416	8.7923e-16
ENSG00000099364.15	2.72354e-14	0.635166	8.80806e-16
ENSG00000103245.12	2.72711e-14	0.495327	8.82429e-16
ENSG00000197299.9	2.74139e-14	0.536449	8.87524e-16
ENSG00000164929.15	2.7973e-14	-0.377285	9.06107e-16
ENSG00000117020.15	2.83441e-14	-0.651703	9.18618e-16
ENSG00000167552.12	2.84279e-14	-0.737114	9.21826e-16
ENSG00000147140.14	2.87274e-14	0.491589	9.32032e-16
ENSG00000198722.11	2.87577e-14	-0.630667	9.3351e-16
ENSG00000105849.5	2.90359e-14	0.482243	9.43043e-16
ENSG00000100902.9	2.92387e-14	0.63374	9.50134e-16
ENSG00000089225.18	2.9338e-14	-0.676287	9.53868e-16
ENSG00000140044.11	2.95943e-14	-0.604879	9.62712e-16
ENSG00000103550.12	3.00583e-14	0.514304	9.78325e-16
ENSG00000106636.6	3.04416e-14	0.581055	9.91326e-16
ENSG00000180900.15	3.09821e-14	0.640266	1.00946e-15
ENSG00000186407.6	3.15987e-14	-0.511484	1.0301e-15
ENSG00000109686.15	3.16233e-14	-0.524188	1.03144e-15
ENSG00000182054.8	3.22853e-14	0.6294	1.05359e-15
ENSG00000222041.9	3.24148e-14	0.69916	1.05838e-15
ENSG00000149679.10	3.29829e-14	0.688801	1.0775e-15
ENSG00000164099.3	3.30955e-14	-0.679297	1.08175e-15
ENSG00000136108.13	3.3209e-14	0.559766	1.0866e-15
ENSG00000167196.12	3.3209e-14	0.495454	1.08645e-15
ENSG00000082512.13	3.51967e-14	0.682148	1.15225e-15
ENSG00000020922.11	3.53068e-14	0.5099	1.15646e-15
ENSG00000159352.14	3.59429e-14	0.586884	1.17792e-15
ENSG00000128228.4	3.73391e-14	0.585173	1.22432e-15
ENSG00000166508.16	3.74885e-14	0.619198	1.22986e-15
ENSG00000085063.13	3.79197e-14	-0.589545	1.24466e-15
ENSG00000110876.9	3.80895e-14	-0.705338	1.2509e-15
ENSG00000126249.6	3.80997e-14	0.53271	1.25189e-15
ENSG00000106086.17	3.85637e-14	0.568383	1.2678e-15
ENSG00000112578.8	3.89479e-14	0.618216	1.2811e-15
ENSG00000162545.5	3.98434e-14	-0.715032	1.31124e-15
ENSG00000143641.9	3.99189e-14	0.59924	1.31442e-15
ENSG00000149257.12	4.08174e-14	0.698749	1.34471e-15
ENSG00000130821.14	4.15724e-14	0.735973	1.3703e-15
ENSG00000115756.11	4.18429e-14	-0.649327	1.37994e-15
ENSG00000171453.16	4.21818e-14	0.508284	1.39184e-15
ENSG00000101294.15	4.22311e-14	0.521559	1.3942e-15
ENSG00000149256.13	4.34775e-14	0.778172	1.4361e-15
ENSG00000114771.12	4.43629e-14	-0.483574	1.46611e-15
ENSG00000262406.2	4.48769e-14	1.03875	1.48387e-15
ENSG00000187837.3	4.499e-14	0.696816	1.48838e-15
ENSG00000126458.3	4.50923e-14	-0.691779	1.49255e-15
ENSG00000170561.11	4.56562e-14	-0.793632	1.512e-15
ENSG00000079102.15	4.69268e-14	-0.533059	1.55488e-15
ENSG00000169891.16	4.85835e-14	-0.697798	1.61062e-15
ENSG00000166526.15	4.88799e-14	0.572438	1.62129e-15
ENSG00000146166.15	4.89066e-14	0.861429	1.62302e-15
ENSG00000124171.7	4.97043e-14	-0.658166	1.65035e-15
ENSG00000188483.7	4.97224e-14	0.752257	1.65181e-15
ENSG00000133687.14	4.99994e-14	-0.777253	1.66187e-15
ENSG00000157557.10	5.01129e-14	-0.863013	1.66651e-15
ENSG00000163884.3	5.12565e-14	-0.664312	1.70543e-15
ENSG00000165175.14	5.12802e-14	-0.661777	1.7071e-15
ENSG00000138346.13	5.26377e-14	0.538318	1.7532e-15
ENSG00000143258.14	5.29232e-14	0.561603	1.76453e-15
ENSG00000197451.9	5.29232e-14	0.580041	1.76376e-15
ENSG00000120057.4	5.42118e-14	-0.418375	1.80843e-15
ENSG00000149262.15	5.42332e-14	0.478631	1.81083e-15
ENSG00000165168.7	5.42332e-14	-0.976493	1.81102e-15
ENSG00000111684.9	5.49327e-14	-0.630255	1.83533e-15
ENSG00000129048.6	5.49485e-14	-0.305211	1.8368e-15
ENSG00000173611.16	5.57115e-14	-0.620624	1.86327e-15
ENSG00000243244.4	5.62715e-14	-0.542436	1.88297e-15
ENSG00000062822.11	5.63038e-14	0.520988	1.88502e-15
ENSG00000049245.11	5.65139e-14	-0.459813	1.89303e-15
ENSG00000157077.13	5.73415e-14	-0.626517	1.92174e-15
ENSG00000139629.14	5.78275e-14	0.78191	1.93903e-15
ENSG00000163156.10	5.79889e-14	0.568098	1.94544e-15
ENSG00000161981.9	5.85751e-14	0.560748	1.96612e-15
ENSG00000235387.1	5.91732e-14	-0.237288	1.98721e-15
ENSG00000165633.11	5.97012e-14	-0.73667	2.00598e-15
ENSG00000244405.6	6.09645e-14	-0.616632	2.04947e-15
ENSG00000164078.11	6.10729e-14	0.608332	2.05417e-15
ENSG00000162298.15	6.20175e-14	0.534453	2.08702e-15
ENSG00000143845.13	6.33854e-14	0.679613	2.13414e-15
ENSG00000101255.9	6.39661e-14	0.677269	2.15479e-15
ENSG00000112699.9	6.53697e-14	0.578077	2.20321e-15
ENSG00000130826.14	6.70771e-14	0.497481	2.26191e-15
ENSG00000035862.11	6.76746e-14	-0.610581	2.28323e-15
ENSG00000258545.4	6.81215e-14	-0.441692	2.29948e-15
ENSG00000163993.6	6.81567e-14	1.63884	2.30185e-15
ENSG00000184678.9	6.85899e-14	0.392523	2.31766e-15
ENSG00000073605.17	6.90735e-14	0.812894	2.33519e-15
ENSG00000164265.7	6.93013e-14	-1.76521	2.34409e-15
ENSG00000174938.13	6.94223e-14	0.700998	2.34938e-15
ENSG00000160813.5	6.94822e-14	0.705116	2.3526e-15
ENSG00000122035.6	7.009e-14	-0.416569	2.37439e-15
ENSG00000153044.8	7.10849e-14	0.500935	2.40933e-15
ENSG00000111110.10	7.38844e-14	0.488611	2.50549e-15
ENSG00000132329.9	7.46566e-14	0.933281	2.53296e-15
ENSG00000138363.13	7.75198e-14	0.53534	2.63144e-15
ENSG00000174371.15	7.88403e-14	0.560748	2.67763e-15
ENSG00000138801.7	7.89141e-14	-0.442927	2.68149e-15
ENSG00000166278.13	7.9078e-14	-0.789387	2.68843e-15
ENSG00000001626.13	8.03434e-14	-0.889561	2.73283e-15
ENSG00000120594.15	8.26604e-14	-0.632885	2.81307e-15
ENSG00000118680.11	8.37559e-14	-0.491589	2.8518e-15
ENSG00000108176.13	8.58821e-14	0.912023	2.92568e-15
ENSG00000021645.16	8.6666e-14	-0.407952	2.95388e-15
ENSG00000115604.9	8.69127e-14	-0.598479	2.96379e-15
ENSG00000141101.11	8.8667e-14	0.545383	3.02514e-15
ENSG00000073910.18	9.02331e-14	-0.640393	3.08013e-15
ENSG00000129657.13	9.34156e-14	-0.58964	3.19038e-15
ENSG00000174607.9	9.50724e-14	0.760494	3.2486e-15
ENSG00000203883.6	9.5074e-14	-0.682623	3.25029e-15
ENSG00000173272.12	9.6037e-14	0.629558	3.28487e-15
ENSG00000106603.16	9.64576e-14	0.521812	3.30092e-15
ENSG00000134333.12	9.66976e-14	0.641312	3.31081e-15
ENSG00000101444.11	9.74879e-14	0.617044	3.33955e-15
ENSG00000116497.16	9.83366e-14	0.522858	3.37032e-15
ENSG00000164266.9	9.89805e-14	1.50429	3.3941e-15
ENSG00000197253.12	9.91024e-14	-0.957611	3.39999e-15
ENSG00000136048.12	9.96527e-14	-0.795058	3.42058e-15
ENSG00000124440.14	1.0687e-13	-0.76192	3.67016e-15
ENSG00000124571.16	1.08565e-13	0.462981	3.73026e-15
ENSG00000097096.8	1.10274e-13	-0.507144	3.79088e-15
ENSG00000159189.10	1.11008e-13	-0.900523	3.81801e-15
ENSG00000172663.7	1.12341e-13	0.535181	3.8658e-15
ENSG00000204315.3	1.12703e-13	0.49707	3.88022e-15
ENSG00000160013.7	1.13252e-13	-0.525202	3.90106e-15
ENSG00000231500.5	1.13301e-13	0.212672	3.90472e-15
ENSG00000158966.12	1.13659e-13	-0.781784	3.91901e-15
ENSG00000066336.10	1.13965e-13	-0.797814	3.93152e-15
[truncated: 8,559 more rows]

## Sheet: LUAD_DDR (FDR < 0.05)
Genes	adjusted p-value	ED	p-values
ENSG00000204305.12	4.15463e-89	-7.88814	7.16983e-94
ENSG00000105974.10	1.62258e-74	-5.722	5.6003e-79
ENSG00000066405.11	4.92185e-71	-5.83326	2.54816e-75
ENSG00000135604.9	2.13721e-63	-1.6167	1.47531e-67
ENSG00000261371.4	1.29821e-62	-2.83349	1.12019e-66
ENSG00000150625.15	4.25384e-61	-1.90268	4.40462e-65
ENSG00000213853.8	8.49481e-61	-5.30746	1.02619e-64
ENSG00000168309.15	1.29621e-59	-2.6293	1.78954e-63
ENSG00000107742.11	1.56659e-58	-2.90204	2.58968e-62
ENSG00000112782.14	1.56659e-58	-2.75863	2.70353e-62
ENSG00000114854.6	5.84228e-58	-1.81248	1.10905e-61
ENSG00000182010.9	2.85607e-57	-2.52229	5.91463e-61
ENSG00000022267.15	3.07773e-57	-2.29989	6.9048e-61
ENSG00000094963.12	6.67286e-57	-2.0742	1.61219e-60
ENSG00000170323.7	1.02163e-56	-2.38948	2.6446e-60
ENSG00000169252.5	8.16982e-56	-1.57843	2.25584e-59
ENSG00000078081.6	8.87771e-56	-2.76173	2.75772e-59
ENSG00000168497.4	8.87771e-56	-2.11297	2.7554e-59
ENSG00000158764.6	1.28307e-55	-1.49764	4.20707e-59
ENSG00000108576.8	1.5312e-54	-2.48294	5.28491e-58
ENSG00000031081.9	1.79279e-54	-1.34728	6.49718e-58
ENSG00000163815.5	2.06154e-54	-2.02785	7.82693e-58
ENSG00000168481.7	2.51033e-54	-2.08814	9.96402e-58
ENSG00000180440.3	7.73864e-54	-1.08861	3.20518e-57
ENSG00000136160.13	4.84586e-53	-1.96297	2.09068e-56
ENSG00000138821.11	1.66451e-52	-1.85823	7.46856e-56
ENSG00000196616.11	2.4499e-52	-2.63662	1.14153e-55
ENSG00000244734.2	2.51345e-52	-3.7489	1.21452e-55
ENSG00000243566.5	2.89781e-52	-2.43026	1.45026e-55
ENSG00000110799.12	3.75625e-52	-3.73103	2.00952e-55
ENSG00000120156.19	3.75625e-52	-1.73749	2.00844e-55
ENSG00000241644.2	3.76543e-52	-2.26783	2.07941e-55
ENSG00000171885.12	1.07723e-51	-2.52489	6.1348e-55
ENSG00000134115.11	2.23942e-50	-0.945794	1.31399e-53
ENSG00000167588.11	2.36233e-50	-1.8172	1.42687e-53
ENSG00000159307.17	3.86508e-50	-1.5151	2.40125e-53
ENSG00000268388.4	5.10214e-50	-1.71687	3.25784e-53
ENSG00000134917.9	5.13356e-50	-1.61955	3.38156e-53
ENSG00000151718.14	5.13356e-50	-1.26216	3.45509e-53
ENSG00000177469.12	1.04661e-49	-2.37722	7.2247e-53
ENSG00000168952.14	1.40031e-49	-1.62116	9.90796e-53
ENSG00000131471.5	2.12879e-49	-1.77589	1.54297e-52
ENSG00000121691.4	2.44298e-49	-1.36395	1.81286e-52
ENSG00000167434.8	2.63458e-49	-1.6128	2.00051e-52
ENSG00000102760.12	2.73863e-49	-1.65912	2.17404e-52
ENSG00000105971.13	2.73863e-49	-1.72397	2.14439e-52
ENSG00000211445.10	3.59448e-49	-3.55181	2.91548e-52
ENSG00000011201.9	5.28277e-49	-1.79179	4.37602e-52
ENSG00000277494.1	5.50274e-49	-1.63399	4.65319e-52
ENSG00000183010.15	5.68556e-49	1.90036	4.90591e-52
ENSG00000148677.6	1.22716e-48	-1.80497	1.08006e-51
__alignment_not_unique	1.64106e-48	-5	1.55762e-51
__ambiguous	1.64106e-48	-5	1.55762e-51
__no_feature	1.64106e-48	-5	1.55762e-51
ENSG00000263155.4	1.64106e-48	-0.998384	1.54075e-51
ENSG00000170989.8	4.72275e-48	-1.49143	4.56414e-51
ENSG00000117724.11	5.05543e-48	1.69469	4.9729e-51
ENSG00000165197.4	7.64627e-48	-1.64771	7.65339e-51
ENSG00000137154.11	7.79397e-48	-4.94019	7.93574e-51
ENSG00000183019.6	1.24019e-47	-2.16531	1.28415e-50
ENSG00000176771.14	2.07259e-47	-1.67787	2.18182e-50
ENSG00000076382.15	4.83497e-47	1.45595	5.17324e-50
ENSG00000135218.16	5.44312e-47	-1.84809	5.91787e-50
ENSG00000142748.11	1.30625e-46	-2.38378	1.44272e-49
ENSG00000131747.13	1.86867e-46	1.90648	2.09615e-49
ENSG00000111052.6	1.99788e-46	-1.13075	2.27556e-49
ENSG00000123119.10	2.42171e-46	-1.17586	2.8001e-49
ENSG00000115361.6	4.01382e-46	-1.2798	4.71024e-49
ENSG00000238018.2	6.79073e-46	-0.777919	8.08616e-49
ENSG00000134057.13	7.11135e-46	1.51101	8.59066e-49
ENSG00000138160.5	7.62902e-46	1.33819	9.34767e-49
ENSG00000128059.7	8.21238e-46	1.1489	1.02058e-48
ENSG00000266524.2	8.21238e-46	-1.28167	1.03459e-48
ENSG00000137804.11	9.56113e-46	1.35625	1.22101e-48
ENSG00000131477.9	9.66851e-46	-1.48814	1.2514e-48
ENSG00000180198.14	1.84275e-45	1.05183	2.41688e-48
ENSG00000139567.11	2.86658e-45	-1.32634	3.80918e-48
ENSG00000154342.5	3.306e-45	-0.874006	4.45015e-48
ENSG00000154175.15	3.92288e-45	-1.54041	5.34821e-48
ENSG00000166292.10	4.69163e-45	-2.13265	6.47724e-48
ENSG00000106462.9	5.34607e-45	1.20548	7.47302e-48
ENSG00000166482.10	5.66815e-45	-2.10369	8.02106e-48
ENSG00000103994.15	5.99074e-45	-0.936322	8.58094e-48
ENSG00000198873.11	6.30577e-45	-1.47759	9.141e-48
ENSG00000019169.10	7.28284e-45	-2.35264	1.06831e-47
ENSG00000198901.12	7.28901e-45	1.35574	1.08179e-47
ENSG00000165810.15	7.42502e-45	-1.64261	1.11479e-47
ENSG00000154721.13	8.16135e-45	-1.2932	1.23943e-47
ENSG00000111897.6	8.52273e-45	-0.890575	1.30902e-47
ENSG00000088325.14	9.1342e-45	1.68709	1.4187e-47
ENSG00000105227.13	1.21839e-44	-1.81514	1.91339e-47
ENSG00000169744.11	1.53015e-44	-1.41026	2.42939e-47
ENSG00000150048.9	1.63208e-44	-0.829019	2.6194e-47
ENSG00000179776.16	2.11251e-44	-1.48975	3.42692e-47
ENSG00000125810.9	2.15515e-44	-1.53268	3.53327e-47
ENSG00000183856.9	2.66088e-44	1.43364	4.40831e-47
ENSG00000156508.16	2.75314e-44	-5.00561	4.60869e-47
ENSG00000133800.7	4.58878e-44	-1.58093	7.76068e-47
ENSG00000122679.7	7.82125e-44	-1.61039	1.33625e-46
ENSG00000257894.2	8.63888e-44	-0.793125	1.49085e-46
ENSG00000135052.15	1.23584e-43	1.32774	2.15407e-46
ENSG00000152583.11	2.06958e-43	-1.93553	3.64299e-46
ENSG00000133661.14	2.33057e-43	-3.72473	4.14262e-46
ENSG00000064989.11	2.38045e-43	-1.51963	4.27238e-46
ENSG00000173517.9	2.82017e-43	-0.977919	5.11024e-46
ENSG00000175832.11	4.998e-43	1.66903	9.14278e-46
ENSG00000128849.10	6.71438e-43	-1.29244	1.24042e-45
ENSG00000158246.7	6.71438e-43	-1.42401	1.25143e-45
ENSG00000141338.12	8.28193e-43	-1.49308	1.55788e-45
ENSG00000249751.3	1.13873e-42	-0.830889	2.16167e-45
ENSG00000159708.16	1.87237e-42	-1.1386	3.58668e-45
ENSG00000072163.17	2.06505e-42	-1.47058	3.9914e-45
ENSG00000118526.6	2.1324e-42	-1.53892	4.15838e-45
ENSG00000186994.10	2.19486e-42	-1.24242	4.31806e-45
ENSG00000159147.16	2.28e-42	1.00722	4.5249e-45
ENSG00000079308.15	3.60273e-42	-4.13075	7.21217e-45
ENSG00000169418.9	4.44896e-42	-1.46669	8.98298e-45
ENSG00000010319.5	4.5562e-42	-1.50841	9.27815e-45
ENSG00000155511.16	4.76735e-42	-1.0288	9.7904e-45
ENSG00000179913.9	4.83523e-42	1.63726	1.00133e-44
ENSG00000188536.11	4.99445e-42	-1.98172	1.04292e-44
ENSG00000162367.10	5.23722e-42	-0.893078	1.10265e-44
ENSG00000164932.11	5.5359e-42	1.79113	1.17509e-44
ENSG00000137857.16	6.13983e-42	-1.84451	1.31388e-44
ENSG00000173391.7	7.71545e-42	-1.65234	1.66436e-44
ENSG00000164855.14	7.86984e-42	1.57643	1.71125e-44
ENSG00000011426.9	9.19327e-42	1.62778	2.01489e-44
ENSG00000163513.16	1.14523e-41	-1.17234	2.52976e-44
ENSG00000128268.11	1.50704e-41	-1.65072	3.35498e-44
ENSG00000171848.12	1.5771e-41	1.61156	3.53817e-44
ENSG00000173706.11	1.61218e-41	-1.43583	3.6447e-44
ENSG00000147689.15	2.04014e-41	2.18866	4.6474e-44
ENSG00000127329.13	2.11338e-41	-1.51104	4.85072e-44
ENSG00000131097.5	2.50919e-41	-0.908284	5.80249e-44
ENSG00000164466.11	2.51581e-41	0.91763	5.86123e-44
ENSG00000227051.5	2.59052e-41	-1.44701	6.07998e-44
ENSG00000164035.8	2.60965e-41	-1.45908	6.16991e-44
ENSG00000267107.5	4.04183e-41	-1.15207	9.62573e-44
ENSG00000103241.6	4.34292e-41	-1.33879	1.04557e-43
ENSG00000138669.8	4.34292e-41	-0.778045	1.04927e-43
ENSG00000122952.15	4.69861e-41	1.35413	1.14331e-43
ENSG00000166025.16	5.13801e-41	-1.09929	1.2591e-43
ENSG00000145147.18	6.31685e-41	-1.4083	1.55888e-43
ENSG00000116016.12	7.22854e-41	-5.22937	1.79634e-43
ENSG00000132622.9	8.20611e-41	-1.28655	2.05344e-43
ENSG00000179820.14	9.43428e-41	-2.05902	2.37705e-43
ENSG00000135917.12	1.26831e-40	-1.2798	3.21751e-43
ENSG00000113569.14	1.57133e-40	0.935942	4.0208e-43
ENSG00000205213.12	1.57133e-40	1.31006	4.04044e-43
ENSG00000133116.7	1.75286e-40	-0.929352	4.53747e-43
ENSG00000101307.14	2.28302e-40	-1.32742	5.9571e-43
ENSG00000105339.9	2.28302e-40	-1.00434	5.98867e-43
ENSG00000154133.13	2.39602e-40	-1.51696	6.32644e-43
ENSG00000189129.12	2.6915e-40	-1.10844	7.15305e-43
ENSG00000171992.11	4.02245e-40	-1.21641	1.07597e-42
ENSG00000233038.4	4.3971e-40	-0.821416	1.18377e-42
ENSG00000101331.14	4.61833e-40	-0.883732	1.2513e-42
ENSG00000126759.11	4.75527e-40	-0.88785	1.29877e-42
ENSG00000156076.8	4.75527e-40	-2.20434	1.30481e-42
ENSG00000183607.8	5.07465e-40	-1.66542	1.40121e-42
ENSG00000178726.6	6.04738e-40	-1.43403	1.68023e-42
ENSG00000133121.19	8.48305e-40	-1.09134	2.37161e-42
ENSG00000043591.5	1.28927e-39	-1.26124	3.62667e-42
ENSG00000104738.15	1.32647e-39	1.20672	3.75419e-42
ENSG00000164934.12	1.38925e-39	0.94703	3.95586e-42
ENSG00000069702.9	1.65218e-39	-1.42832	4.73305e-42
ENSG00000167972.12	1.69236e-39	-4.37659	4.87738e-42
ENSG00000047648.20	2.13285e-39	-1.00114	6.18366e-42
ENSG00000171056.7	2.29528e-39	-1.22373	6.69422e-42
ENSG00000007402.10	3.05165e-39	-2.15932	8.95282e-42
ENSG00000090006.16	3.94962e-39	-1.62915	1.16554e-41
ENSG00000161649.11	4.04584e-39	-0.911643	1.20092e-41
ENSG00000117394.18	4.64629e-39	1.6319	1.38717e-41
ENSG00000160688.17	5.15896e-39	0.960367	1.54913e-41
ENSG00000260908.1	7.00961e-39	-0.875875	2.11694e-41
ENSG00000166265.10	8.23453e-39	-1.24112	2.50108e-41
ENSG00000029993.13	1.05437e-38	1.7004	3.22064e-41
ENSG00000166123.12	1.21054e-38	1.56182	3.71856e-41
ENSG00000095713.12	1.44627e-38	-1.8907	4.46766e-41
ENSG00000138593.7	1.63893e-38	-1.03266	5.09107e-41
ENSG00000147526.18	2.41947e-38	-1.26089	7.55746e-41
ENSG00000196549.9	3.44496e-38	-1.70423	1.08201e-40
ENSG00000164741.13	3.46514e-38	-1.62712	1.09433e-40
ENSG00000107242.16	3.83368e-38	-1.35723	1.21734e-40
ENSG00000184445.10	3.91155e-38	1.17329	1.25556e-40
ENSG00000206384.9	3.91155e-38	-1.40434	1.25468e-40
ENSG00000116194.11	4.37935e-38	-0.785902	1.41328e-40
ENSG00000162849.14	4.68183e-38	1.50702	1.51897e-40
ENSG00000105538.7	4.83743e-38	-1.21381	1.5778e-40
ENSG00000120279.6	6.41792e-38	-1.20893	2.10438e-40
ENSG00000114790.11	8.01164e-38	-1.41362	2.64077e-40
ENSG00000163918.9	8.22643e-38	1.06105	2.72577e-40
ENSG00000171115.3	9.06626e-38	-1.23703	3.01969e-40
ENSG00000112214.9	9.42165e-38	-0.787645	3.15432e-40
ENSG00000165312.6	1.03446e-37	-1.02332	3.48913e-40
ENSG00000224397.4	1.03446e-37	-1.3757	3.49902e-40
ENSG00000070778.11	1.22703e-37	-1.24004	4.19273e-40
ENSG00000129596.4	1.22703e-37	-0.704514	4.18049e-40
ENSG00000171509.14	1.36889e-37	-0.676224	4.70109e-40
ENSG00000172159.14	1.48868e-37	-0.929352	5.13817e-40
ENSG00000177098.7	1.55618e-37	-1.30375	5.39801e-40
ENSG00000145247.10	1.55697e-37	1.20944	5.42761e-40
ENSG00000112902.10	1.82431e-37	-1.52232	6.39103e-40
ENSG00000144554.9	3.22393e-37	0.937431	1.13499e-39
ENSG00000067082.13	4.10174e-37	-1.91411	1.4511e-39
ENSG00000117399.12	4.12106e-37	1.4223	1.46505e-39
ENSG00000143217.8	4.19388e-37	1.18232	1.49818e-39
ENSG00000133401.14	4.91768e-37	-1.47546	1.76523e-39
ENSG00000095370.18	4.93322e-37	-1.1943	1.77932e-39
ENSG00000071967.10	5.22168e-37	-1.3297	1.89237e-39
ENSG00000038945.13	5.51014e-37	-1.43966	2.00642e-39
ENSG00000134256.11	6.02065e-37	-1.05934	2.20453e-39
ENSG00000182575.7	6.02065e-37	-0.780041	2.21309e-39
ENSG00000197415.10	6.21872e-37	-1.5553	2.29663e-39
ENSG00000129250.10	7.39433e-37	-0.989989	2.74355e-39
ENSG00000006625.16	7.40204e-37	0.936449	2.75919e-39
ENSG00000187116.12	8.55114e-37	-0.867163	3.20229e-39
ENSG00000166851.13	9.16186e-37	1.25969	3.44681e-39
ENSG00000184347.13	1.08725e-36	-1.52945	4.10913e-39
ENSG00000134020.7	1.22819e-36	-1.8453	4.66299e-39
ENSG00000118777.9	1.36445e-36	-0.959892	5.20387e-39
ENSG00000114812.11	1.40336e-36	-1.65253	5.37649e-39
ENSG00000173114.11	1.78652e-36	-0.780168	6.87527e-39
ENSG00000161835.9	1.81286e-36	-1.22987	7.00792e-39
ENSG00000101311.14	1.83955e-36	1.31738	7.14282e-39
ENSG00000229619.3	1.8639e-36	-0.752004	7.26955e-39
ENSG00000164161.8	2.1419e-36	-1.88966	8.39075e-39
ENSG00000111206.11	3.0416e-36	1.41283	1.20203e-38
ENSG00000160957.11	3.0416e-36	1.24473	1.20106e-38
ENSG00000164764.10	3.35318e-36	-0.929352	1.33266e-38
ENSG00000198844.9	3.35318e-36	-1.23463	1.33674e-38
ENSG00000175084.10	3.47317e-36	-1.66333	1.39056e-38
ENSG00000168907.12	4.2679e-36	-1.57013	1.71612e-38
ENSG00000260314.2	4.28556e-36	-1.87413	1.73061e-38
ENSG00000176435.6	4.9119e-36	-1.22797	1.99202e-38
ENSG00000148488.14	4.9622e-36	-0.632853	2.02099e-38
ENSG00000164941.12	5.17262e-36	0.874386	2.11561e-38
ENSG00000135063.16	5.62025e-36	-1.45709	2.30839e-38
ENSG00000127241.15	6.28312e-36	-0.902677	2.59149e-38
ENSG00000092421.15	7.00467e-36	-1.31424	2.92536e-38
ENSG00000115368.8	7.00467e-36	0.818058	2.91376e-38
ENSG00000165495.14	7.00467e-36	-0.920006	2.92344e-38
ENSG00000101057.14	7.07469e-36	1.62405	2.96681e-38
ENSG00000109586.10	7.59898e-36	1.02477	3.21171e-38
ENSG00000243364.6	7.59898e-36	1.10604	3.21291e-38
ENSG00000035141.6	7.82431e-36	0.860922	3.32168e-38
ENSG00000162063.11	8.10316e-36	1.06266	3.45404e-38
ENSG00000101335.8	8.39259e-36	-1.21407	3.5919e-38
ENSG00000182004.11	9.56376e-36	0.860668	4.10965e-38
ENSG00000250899.3	1.15273e-35	-0.657405	4.97331e-38
ENSG00000134201.9	1.33342e-35	-0.88199	5.77585e-38
ENSG00000140525.16	1.79665e-35	1.0281	7.81341e-38
ENSG00000104967.6	1.82713e-35	-0.972723	7.9775e-38
ENSG00000004776.10	1.91064e-35	-1.28706	8.37508e-38
ENSG00000278259.3	1.91239e-35	0.908284	8.41575e-38
ENSG00000080618.12	2.0096e-35	-1.33128	8.87822e-38
ENSG00000167850.3	2.0649e-35	-0.831269	9.15818e-38
ENSG00000183287.12	2.21977e-35	-1.18872	9.88336e-38
ENSG00000240583.9	2.30801e-35	-4.46137	1.03161e-37
ENSG00000173457.9	2.37316e-35	1.1348	1.06892e-37
ENSG00000187741.13	2.37316e-35	1.00174	1.06757e-37
ENSG00000149021.5	3.46936e-35	-4.53705	1.56874e-37
ENSG00000160949.15	3.46936e-35	1.14278	1.57464e-37
ENSG00000141934.8	3.63154e-35	1.41635	1.65451e-37
ENSG00000157554.17	3.65119e-35	-1.12973	1.66977e-37
ENSG00000184113.9	3.65563e-35	-1.47572	1.67811e-37
ENSG00000089685.13	5.5498e-35	1.47999	2.5572e-37
ENSG00000164611.11	7.56493e-35	1.19775	3.49878e-37
ENSG00000142973.11	7.71002e-35	-2.59791	3.57919e-37
ENSG00000198948.10	9.28648e-35	-0.869159	4.32705e-37
ENSG00000092964.15	1.27717e-34	-1.14852	5.97304e-37
ENSG00000123500.8	1.28761e-34	1.63688	6.04407e-37
ENSG00000168484.11	1.29436e-34	-7.52523	6.09811e-37
ENSG00000137648.15	1.34047e-34	2.03437	6.33846e-37
ENSG00000131831.16	1.40096e-34	-1.16084	6.64869e-37
ENSG00000160867.13	1.51059e-34	-1.42183	7.19504e-37
ENSG00000165072.9	1.62644e-34	-1.40336	7.77487e-37
ENSG00000198648.9	1.92366e-34	0.933819	9.22891e-37
ENSG00000118785.12	2.01723e-34	2.32026	9.71261e-37
ENSG00000227036.5	2.19113e-34	1.21844	1.05877e-36
ENSG00000225329.2	2.412e-34	-1.17912	1.16966e-36
ENSG00000257542.4	2.44905e-34	-0.742531	1.19185e-36
ENSG00000276850.3	2.84566e-34	-0.695295	1.38978e-36
ENSG00000138018.16	3.0843e-34	0.881356	1.51165e-36
ENSG00000185432.11	3.33727e-34	-1.19629	1.64139e-36
ENSG00000166961.13	3.45993e-34	-1.61983	1.70769e-36
ENSG00000111863.11	3.79827e-34	-0.944939	1.88124e-36
ENSG00000154764.5	3.84624e-34	-0.761856	1.91164e-36
ENSG00000259417.2	3.85214e-34	-0.697038	1.92122e-36
ENSG00000091106.17	5.00595e-34	-0.835387	2.50531e-36
ENSG00000155659.13	5.23102e-34	-1.45123	2.62697e-36
ENSG00000170890.12	5.23938e-34	-0.863932	2.64022e-36
ENSG00000197256.9	5.41074e-34	-1.06022	2.7359e-36
ENSG00000171243.7	5.89917e-34	-1.22322	2.99305e-36
ENSG00000140092.13	6.05565e-34	-1.18416	3.0829e-36
ENSG00000276644.3	6.96005e-34	-0.897576	3.55534e-36
ENSG00000143167.10	8.72121e-34	-0.851703	4.47002e-36
ENSG00000125459.13	8.92654e-34	0.952511	4.59067e-36
ENSG00000136546.12	9.97184e-34	-1.42968	5.14545e-36
ENSG00000239672.6	1.00773e-33	1.13534	5.21727e-36
ENSG00000183048.10	1.09006e-33	1.07264	5.66231e-36
ENSG00000113460.11	1.11007e-33	0.865421	5.7854e-36
ENSG00000152580.8	1.16837e-33	-1.32831	6.11282e-36
ENSG00000237649.6	1.16837e-33	1.21483	6.12957e-36
ENSG00000144843.10	1.16955e-33	-0.945161	6.15597e-36
ENSG00000085552.15	1.22497e-33	1.27626	6.46882e-36
ENSG00000114654.7	1.38357e-33	-1.0485	7.33022e-36
ENSG00000148773.11	1.43941e-33	1.50448	7.65088e-36
ENSG00000261236.4	1.70643e-33	0.990527	9.0996e-36
ENSG00000099994.10	1.75251e-33	-2.42848	9.37559e-36
ENSG00000188001.8	1.77184e-33	-0.745034	9.50957e-36
ENSG00000188906.12	2.09743e-33	-1.93518	1.12932e-35
ENSG00000106034.16	2.23785e-33	-1.14602	1.20879e-35
ENSG00000087586.16	2.25436e-33	1.18292	1.2216e-35
ENSG00000075624.12	2.44066e-33	-5.03178	1.32676e-35
ENSG00000107738.18	2.54988e-33	-0.961223	1.39054e-35
ENSG00000142273.9	2.55852e-33	1.11589	1.39966e-35
ENSG00000136114.14	2.56523e-33	-0.963377	1.40777e-35
ENSG00000170312.14	2.73711e-33	1.3125	1.50681e-35
ENSG00000173376.12	2.9445e-33	-1.46507	1.62606e-35
ENSG00000171049.8	3.40978e-33	-0.974212	1.8889e-35
ENSG00000025423.10	3.47096e-33	-1.59569	1.92877e-35
ENSG00000168411.12	5.09365e-33	0.794012	2.83928e-35
ENSG00000096088.15	5.17081e-33	-2.67245	2.89121e-35
ENSG00000176920.11	5.57637e-33	1.15314	3.1276e-35
ENSG00000130307.10	5.60683e-33	-0.738666	3.15436e-35
ENSG00000138772.11	5.71461e-33	-1.18704	3.22486e-35
ENSG00000112137.15	5.82046e-33	-1.13258	3.29464e-35
ENSG00000130052.12	6.21967e-33	-1.09754	3.53134e-35
ENSG00000064042.16	6.32688e-33	-1.11411	3.60313e-35
ENSG00000004799.7	9.83779e-33	-1.57858	5.61956e-35
ENSG00000144218.17	1.04437e-32	-1.27597	5.98369e-35
ENSG00000175445.13	1.08741e-32	-1.6511	6.24905e-35
ENSG00000149554.11	1.10606e-32	0.983178	6.37531e-35
ENSG00000115761.14	1.21822e-32	0.790654	7.04285e-35
ENSG00000130164.10	1.25657e-32	-1.46203	7.28622e-35
ENSG00000173898.10	1.26354e-32	1.28142	7.34846e-35
ENSG00000198075.8	1.43065e-32	-0.674481	8.34503e-35
ENSG00000113070.7	1.45755e-32	-1.40656	8.52704e-35
ENSG00000117069.13	1.5422e-32	-1.20244	9.0489e-35
ENSG00000076003.4	1.84744e-32	0.904293	1.08718e-34
ENSG00000147257.12	1.88492e-32	-1.51323	1.11249e-34
ENSG00000076067.10	2.30822e-32	-0.831015	1.36631e-34
ENSG00000231322.4	2.38937e-32	-0.778045	1.41847e-34
ENSG00000155066.14	2.4247e-32	1.20412	1.44362e-34
ENSG00000064313.10	2.65145e-32	0.786789	1.5832e-34
ENSG00000135363.10	2.84636e-32	-1.01704	1.7045e-34
ENSG00000149557.11	3.09862e-32	-1.06124	1.86091e-34
ENSG00000077152.8	3.28307e-32	1.07664	1.97734e-34
ENSG00000164109.12	3.45965e-32	1.06903	2.08966e-34
ENSG00000070614.13	3.54895e-32	-1.03868	2.14973e-34
ENSG00000179967.11	3.60459e-32	0.938191	2.18965e-34
ENSG00000149564.10	3.61741e-32	-1.14652	2.20654e-34
ENSG00000198380.11	3.61741e-32	0.937811	2.20993e-34
ENSG00000123243.13	3.6675e-32	-1.30581	2.24686e-34
ENSG00000105011.7	4.74847e-32	1.07264	2.9173e-34
ENSG00000111961.15	5.58037e-32	-0.867353	3.43801e-34
ENSG00000139304.11	6.3473e-32	-0.531158	3.92147e-34
ENSG00000167261.12	8.83192e-32	-0.917155	5.47175e-34
ENSG00000171777.14	9.50064e-32	-0.718105	5.90244e-34
ENSG00000138685.11	1.08478e-31	-0.827911	6.75811e-34
ENSG00000163882.8	1.13104e-31	0.860668	7.06581e-34
ENSG00000106991.12	1.14879e-31	-1.07461	7.19652e-34
ENSG00000099260.9	1.26974e-31	-1.18029	7.97615e-34
ENSG00000100196.9	1.29949e-31	1.15891	8.18544e-34
ENSG00000162687.15	1.30726e-31	-0.621765	8.25697e-34
ENSG00000110492.14	1.33213e-31	1.50185	8.43704e-34
ENSG00000154783.9	1.3631e-31	-1.09187	8.65671e-34
ENSG00000103647.11	1.36634e-31	-0.757738	8.70084e-34
ENSG00000087074.7	1.40879e-31	-1.12428	8.99546e-34
ENSG00000138180.14	1.4971e-31	1.14941	9.58523e-34
ENSG00000174175.15	1.65285e-31	-1.07869	1.06109e-33
ENSG00000144331.17	1.71816e-31	-1.26815	1.10599e-33
ENSG00000261143.1	1.73467e-31	-0.629241	1.1196e-33
ENSG00000166927.11	1.77092e-31	-1.23162	1.14606e-33
ENSG00000225383.5	1.8937e-31	-1.2977	1.22879e-33
ENSG00000250722.4	2.05396e-31	-1.25202	1.33632e-33
ENSG00000133112.15	2.3635e-31	-5.03364	1.54179e-33
ENSG00000111275.11	2.47898e-31	-0.996135	1.6214e-33
ENSG00000168477.16	2.67447e-31	-1.62151	1.75387e-33
ENSG00000168743.11	2.69797e-31	-1.37437	1.77686e-33
ENSG00000173269.12	2.69797e-31	-1.09225	1.7786e-33
ENSG00000121075.8	3.48211e-31	-1.19262	2.30541e-33
ENSG00000186417.12	3.48211e-31	-1.16816	2.30754e-33
ENSG00000137842.5	3.52771e-31	0.837003	2.34385e-33
ENSG00000175063.15	3.61495e-31	1.41483	2.40805e-33
ENSG00000112984.10	3.70023e-31	1.07277	2.47125e-33
ENSG00000144655.13	3.75176e-31	-1.2192	2.51214e-33
ENSG00000104918.6	3.86242e-31	-0.770822	2.5929e-33
ENSG00000114200.8	3.92207e-31	-0.772691	2.63971e-33
ENSG00000046653.13	3.92599e-31	-1.16369	2.66016e-33
ENSG00000164619.7	3.92599e-31	-0.71649	2.66268e-33
ENSG00000183087.13	3.92599e-31	-1.17564	2.65778e-33
ENSG00000094804.8	3.99213e-31	1.13084	2.71442e-33
ENSG00000120645.10	4.04825e-31	-0.697165	2.75956e-33
ENSG00000144120.11	4.47975e-31	0.820434	3.06144e-33
ENSG00000154065.15	5.53523e-31	-1.25658	3.7923e-33
ENSG00000154188.8	5.99999e-31	-1.25519	4.12107e-33
ENSG00000167900.10	6.3338e-31	1.37339	4.36128e-33
ENSG00000115380.17	8.2583e-31	-1.25503	5.70068e-33
ENSG00000170477.11	8.27734e-31	-1.37703	5.72812e-33
ENSG00000184005.10	8.84737e-31	-0.67087	6.13786e-33
ENSG00000169679.13	8.96032e-31	1.17532	6.23168e-33
ENSG00000134690.9	1.0404e-30	1.06716	7.25367e-33
ENSG00000254726.2	1.07225e-30	1.2486	7.49424e-33
ENSG00000171303.6	1.21918e-30	-1.38679	8.5422e-33
ENSG00000066279.15	1.3003e-30	1.11402	9.13299e-33
ENSG00000162407.8	1.45819e-30	-0.815809	1.02671e-32
ENSG00000112425.12	1.55212e-30	-0.682211	1.09553e-32
ENSG00000165757.8	1.58938e-30	-1.17719	1.12457e-32
ENSG00000099953.8	1.65626e-30	1.68535	1.17475e-32
ENSG00000140254.11	1.69938e-30	-1.25196	1.20827e-32
ENSG00000171132.12	1.76528e-30	-0.921622	1.25817e-32
ENSG00000108773.9	1.99481e-30	0.965215	1.42521e-32
ENSG00000163145.11	2.01152e-30	-0.92026	1.44061e-32
ENSG00000171004.16	2.14674e-30	1.4856	1.54117e-32
ENSG00000156218.11	2.27074e-30	-1.16655	1.63411e-32
ENSG00000115896.14	2.28497e-30	-0.743165	1.64829e-32
ENSG00000170909.12	2.33358e-30	-1.20859	1.68738e-32
ENSG00000157456.6	2.33915e-30	1.07277	1.69544e-32
ENSG00000126602.9	2.54866e-30	0.784635	1.8517e-32
ENSG00000135069.12	2.66258e-30	1.23339	1.94159e-32
ENSG00000163710.6	2.66258e-30	-1.22474	1.94366e-32
ENSG00000146670.8	3.65679e-30	1.14754	2.67573e-32
ENSG00000109501.12	3.83177e-30	-0.975447	2.81038e-32
ENSG00000173482.15	4.13161e-30	-0.978172	3.03742e-32
ENSG00000104267.8	4.17828e-30	-1.14256	3.07895e-32
ENSG00000198554.10	4.57402e-30	0.913765	3.37845e-32
ENSG00000119203.12	4.79397e-30	0.732805	3.54919e-32
ENSG00000125740.12	5.03974e-30	-3.50531	3.73984e-32
ENSG00000012822.14	5.74752e-30	-0.805481	4.27498e-32
ENSG00000163492.12	6.08142e-30	-0.631237	4.53383e-32
ENSG00000079616.11	6.48122e-30	0.838365	4.84308e-32
ENSG00000168685.13	7.30695e-30	-1.29035	5.47271e-32
ENSG00000058335.14	7.89862e-30	-1.39129	5.92948e-32
ENSG00000197471.10	8.44045e-30	-1.20317	6.3508e-32
ENSG00000159063.11	1.09414e-29	0.790147	8.2515e-32
ENSG00000153093.17	1.10219e-29	-0.809853	8.33117e-32
ENSG00000244280.1	1.14434e-29	-0.608554	8.66954e-32
ENSG00000116678.17	1.17544e-29	-1.10344	8.92542e-32
ENSG00000145386.8	1.17987e-29	1.07464	8.97944e-32
ENSG00000261685.2	1.25167e-29	-0.80697	9.54748e-32
ENSG00000182481.7	1.30521e-29	1.10052	9.97843e-32
ENSG00000106688.10	1.33655e-29	-1.31243	1.02411e-31
ENSG00000155011.7	1.39535e-29	-0.858071	1.07157e-31
ENSG00000122694.14	1.43843e-29	-1.16246	1.10713e-31
ENSG00000143799.11	1.51163e-29	0.787138	1.16608e-31
ENSG00000136826.13	1.51928e-29	-1.36259	1.1746e-31
ENSG00000114346.12	1.66233e-29	0.891842	1.28807e-31
ENSG00000143320.7	1.72765e-29	2.11687	1.34167e-31
ENSG00000112964.12	2.07159e-29	-0.601077	1.61234e-31
ENSG00000164736.5	2.14083e-29	-0.725329	1.66992e-31
ENSG00000055813.5	2.26705e-29	-0.533027	1.77229e-31
ENSG00000183765.19	2.51961e-29	0.892951	1.97409e-31
ENSG00000152818.17	2.58276e-29	-0.996325	2.02802e-31
ENSG00000198826.9	2.77609e-29	0.988532	2.18461e-31
ENSG00000109846.6	2.82143e-29	-1.15511	2.22516e-31
ENSG00000120913.22	2.88415e-29	-0.988817	2.27961e-31
ENSG00000111602.10	3.19446e-29	0.863678	2.53038e-31
ENSG00000137474.18	3.24476e-29	1.00298	2.57583e-31
ENSG00000225342.2	3.27121e-29	-1.02709	2.60247e-31
ENSG00000137807.12	3.29417e-29	1.0243	2.62642e-31
ENSG00000197713.13	3.3936e-29	0.763472	2.71155e-31
ENSG00000141639.10	3.60789e-29	-0.664153	2.889e-31
ENSG00000167641.9	3.64896e-29	-1.05215	2.92819e-31
ENSG00000142945.11	3.66953e-29	1.1438	2.95102e-31
ENSG00000133561.14	3.68874e-29	-1.05075	2.97284e-31
ENSG00000077943.7	3.71225e-29	-1.16125	2.9982e-31
ENSG00000091428.16	3.74056e-29	-0.78492	3.02751e-31
ENSG00000103257.7	3.77686e-29	1.28896	3.06341e-31
ENSG00000137033.10	4.11426e-29	-1.26311	3.34417e-31
ENSG00000197930.11	4.19577e-29	0.979439	3.41767e-31
ENSG00000152402.9	4.2921e-29	-1.13867	3.50354e-31
ENSG00000157927.15	4.50446e-29	-0.714494	3.68466e-31
ENSG00000126785.11	4.72098e-29	-0.959956	3.86992e-31
ENSG00000175643.8	4.79417e-29	0.904293	3.93819e-31
ENSG00000116120.9	5.2637e-29	0.753873	4.33297e-31
ENSG00000124107.5	5.31085e-29	-2.02851	4.38095e-31
ENSG00000154734.13	5.96755e-29	-1.31313	4.93297e-31
ENSG00000134709.9	6.42813e-29	0.768098	5.32479e-31
ENSG00000123360.10	6.47442e-29	-0.748772	5.38548e-31
ENSG00000184226.13	6.47442e-29	-0.867797	5.38167e-31
ENSG00000123213.21	6.56525e-29	0.796262	5.47236e-31
ENSG00000137288.8	7.59781e-29	0.860067	6.34615e-31
ENSG00000166965.11	7.62528e-29	0.874259	6.38225e-31
ENSG00000137507.10	7.99531e-29	-1.14351	6.70576e-31
ENSG00000153823.17	8.0087e-29	-1.12112	6.73082e-31
ENSG00000180061.8	8.3133e-29	-0.695549	7.00116e-31
ENSG00000096063.13	9.06333e-29	0.781118	7.64845e-31
ENSG00000119969.13	9.49347e-29	0.906415	8.02782e-31
ENSG00000003147.16	1.05859e-28	0.810581	8.96982e-31
ENSG00000080503.18	1.15871e-28	-0.827657	9.83821e-31
ENSG00000187824.7	1.24419e-28	-0.724853	1.05855e-30
ENSG00000187800.12	1.38555e-28	-1.04416	1.1812e-30
ENSG00000169860.6	1.40216e-28	-0.830794	1.19779e-30
ENSG00000156802.11	1.42247e-28	0.854459	1.21759e-30
ENSG00000133026.11	1.52946e-28	-1.07819	1.31181e-30
ENSG00000128050.7	1.55268e-28	0.929511	1.33441e-30
ENSG00000074527.10	1.55926e-28	-1.03064	1.34275e-30
ENSG00000141448.7	1.63962e-28	-1.10379	1.41478e-30
ENSG00000198848.11	1.81246e-28	-1.51592	1.56705e-30
ENSG00000101938.13	1.95023e-28	-1.39829	1.68953e-30
ENSG00000078114.17	1.98526e-28	-0.971329	1.72331e-30
ENSG00000040275.15	2.04743e-28	0.803485	1.7808e-30
ENSG00000223573.5	2.23415e-28	-0.661777	1.94706e-30
ENSG00000048740.16	2.44909e-28	-0.913892	2.13861e-30
ENSG00000137726.14	2.5003e-28	-1.04537	2.18764e-30
ENSG00000119457.7	2.55909e-28	-0.992555	2.2435e-30
ENSG00000117114.18	2.5646e-28	-1.00269	2.25276e-30
ENSG00000000938.11	2.58397e-28	-1.06719	2.27423e-30
ENSG00000113368.10	2.60447e-28	0.946808	2.29677e-30
ENSG00000131055.4	2.69194e-28	-0.79962	2.37854e-30
ENSG00000006634.6	2.8239e-28	0.846095	2.50002e-30
ENSG00000079462.6	2.84111e-28	1.17789	2.52016e-30
ENSG00000136628.16	2.84911e-28	0.78191	2.53217e-30
ENSG00000032444.14	2.9393e-28	-0.893204	2.6174e-30
ENSG00000179144.4	3.21509e-28	-1.02864	2.86853e-30
ENSG00000159713.9	3.2219e-28	-1.57519	2.88017e-30
ENSG00000101457.11	3.28585e-28	0.945034	2.94301e-30
ENSG00000136404.14	3.38017e-28	-0.70141	3.03332e-30
ENSG00000156298.11	4.00663e-28	-1.24426	3.60242e-30
ENSG00000085760.13	4.21221e-28	0.754633	3.79452e-30
ENSG00000033170.15	4.27705e-28	0.884714	3.86031e-30
ENSG00000183807.7	4.38801e-28	-0.621765	3.96803e-30
ENSG00000090889.11	4.41137e-28	1.0486	4.00328e-30
ENSG00000111859.15	4.41137e-28	-1.23612	4.00438e-30
ENSG00000004864.12	4.58597e-28	0.760748	4.17079e-30
ENSG00000148175.11	4.8462e-28	-0.994044	4.41582e-30
ENSG00000182253.13	4.99791e-28	-0.971551	4.56269e-30
ENSG00000157734.12	5.45204e-28	-0.925012	4.98668e-30
ENSG00000125848.9	5.91435e-28	-1.27898	5.41973e-30
ENSG00000172322.12	6.21545e-28	-0.773578	5.70638e-30
ENSG00000204217.11	7.01422e-28	-0.854998	6.45183e-30
ENSG00000186340.13	8.13991e-28	1.40095	7.50131e-30
ENSG00000132970.11	8.36146e-28	-1.02287	7.71992e-30
ENSG00000012779.9	9.31622e-28	-1.11525	8.6175e-30
ENSG00000206053.11	9.94792e-28	0.818185	9.21899e-30
ENSG00000186188.9	1.03849e-27	-0.729447	9.64184e-30
ENSG00000133246.10	1.07797e-27	-1.0039	1.00271e-29
ENSG00000163687.12	1.08705e-27	-0.940314	1.01302e-29
ENSG00000254122.2	1.12442e-27	-0.695802	1.04979e-29
ENSG00000189241.6	1.21347e-27	-0.685823	1.13503e-29
ENSG00000169583.12	1.25323e-27	-1.17421	1.17438e-29
ENSG00000164305.16	1.25516e-27	0.754126	1.17835e-29
ENSG00000176890.14	1.29214e-27	0.995977	1.2153e-29
ENSG00000092295.10	1.31242e-27	-0.578394	1.23664e-29
ENSG00000159640.13	1.36771e-27	-1.02538	1.2911e-29
ENSG00000005156.10	1.54765e-27	0.728972	1.46363e-29
ENSG00000125450.9	1.55499e-27	0.750135	1.47325e-29
ENSG00000156052.9	1.63805e-27	-0.745921	1.55477e-29
ENSG00000197766.6	1.91196e-27	-1.35457	1.81806e-29
ENSG00000183486.11	1.96614e-27	0.889086	1.87297e-29
ENSG00000169442.7	2.03124e-27	-1.29805	1.93849e-29
ENSG00000119285.9	2.14672e-27	0.71611	2.05239e-29
ENSG00000164659.13	2.25033e-27	-1.04749	2.15534e-29
ENSG00000203499.9	2.29502e-27	1.16442	2.2021e-29
ENSG00000235584.2	2.31636e-27	-0.981087	2.22658e-29
ENSG00000114378.15	2.51178e-27	-1.28487	2.41875e-29
ENSG00000130590.12	2.56027e-27	0.855948	2.46987e-29
ENSG00000176697.17	2.59946e-27	-0.644575	2.51216e-29
ENSG00000110660.13	2.69728e-27	0.943323	2.61136e-29
ENSG00000144354.12	3.08245e-27	1.12447	2.99219e-29
ENSG00000168528.10	3.08245e-27	1.01435	2.99489e-29
ENSG00000159055.3	3.16392e-27	0.808712	3.0795e-29
ENSG00000119862.11	3.24385e-27	-1.00288	3.16291e-29
ENSG00000082213.16	3.28219e-27	0.743799	3.20595e-29
ENSG00000100558.7	3.31428e-27	1.00361	3.24993e-29
ENSG00000135632.10	3.31428e-27	0.745541	3.25079e-29
ENSG00000159259.7	3.31428e-27	0.844606	3.25446e-29
ENSG00000181192.10	3.36529e-27	0.770822	3.31035e-29
ENSG00000073111.12	3.75971e-27	0.934833	3.7113e-29
ENSG00000111077.16	3.75971e-27	-0.953778	3.71036e-29
ENSG00000148344.10	3.86615e-27	1.32732	3.82305e-29
ENSG00000150938.8	4.02066e-27	-0.873531	3.98971e-29
ENSG00000180772.6	4.02066e-27	-1.22585	3.98566e-29
ENSG00000108823.14	4.04655e-27	-0.779313	4.02238e-29
ENSG00000135111.13	4.30278e-27	-1.07648	4.28451e-29
ENSG00000167747.12	4.36032e-27	0.796262	4.34933e-29
ENSG00000166923.9	4.70256e-27	1.55476	4.69882e-29
ENSG00000177494.5	4.90723e-27	-0.954285	4.91181e-29
ENSG00000123473.14	5.92578e-27	0.813084	5.94153e-29
ENSG00000100442.9	6.42506e-27	0.780041	6.45322e-29
ENSG00000198804.2	6.75526e-27	-4.95625	6.79653e-29
ENSG00000137393.9	7.15947e-27	-0.87258	7.21556e-29
ENSG00000079385.20	7.43397e-27	0.933217	7.50504e-29
ENSG00000278053.3	7.7569e-27	0.714621	7.84444e-29
ENSG00000276043.3	8.05654e-27	0.927103	8.16137e-29
ENSG00000106089.10	8.61882e-27	0.971963	8.74584e-29
ENSG00000112531.15	8.64993e-27	-0.790686	8.79234e-29
ENSG00000197872.10	9.07097e-27	-0.906289	9.23597e-29
ENSG00000235997.2	9.18715e-27	-0.72384	9.37011e-29
ENSG00000137872.14	9.5183e-27	-1.03941	9.72428e-29
ENSG00000151651.14	1.00995e-26	1.03029	1.03355e-28
ENSG00000138207.11	1.0146e-26	-1.06596	1.04006e-28
ENSG00000090530.8	1.0312e-26	-1.42474	1.05885e-28
ENSG00000101407.11	1.13652e-26	0.728719	1.16896e-28
ENSG00000165124.16	1.18727e-26	-1.20776	1.22321e-28
ENSG00000156804.6	1.24732e-26	1.03003	1.28723e-28
ENSG00000151715.6	1.48909e-26	0.940314	1.5393e-28
ENSG00000133195.10	1.72398e-26	0.78039	1.78509e-28
ENSG00000174837.13	1.72504e-26	-0.751877	1.78916e-28
ENSG00000135049.14	1.81558e-26	-0.754253	1.8862e-28
ENSG00000128654.12	1.89865e-26	0.765722	1.97578e-28
ENSG00000061656.8	2.05257e-26	0.93271	2.13949e-28
ENSG00000124766.5	2.26937e-26	0.950515	2.3694e-28
ENSG00000198886.2	2.50228e-26	-5.00672	2.61689e-28
ENSG00000234456.6	2.52869e-26	-0.975543	2.64887e-28
ENSG00000144681.9	2.5739e-26	-1.0408	2.70067e-28
ENSG00000241399.5	2.72793e-26	-0.978679	2.86699e-28
ENSG00000141562.16	2.74731e-26	0.791224	2.8921e-28
ENSG00000164687.9	2.76516e-26	-1.13581	2.91567e-28
ENSG00000128165.8	2.78772e-26	0.971836	2.94427e-28
ENSG00000137834.13	3.00054e-26	-1.13395	3.17421e-28
ENSG00000120253.12	3.36246e-26	0.718739	3.56288e-28
ENSG00000214491.7	3.88497e-26	-0.981847	4.12324e-28
ENSG00000115306.14	3.95799e-26	-4.43589	4.20757e-28
ENSG00000279662.1	4.0014e-26	-0.801109	4.26063e-28
ENSG00000232119.6	4.02343e-26	0.753018	4.29103e-28
ENSG00000122042.9	4.257e-26	-0.756249	4.54748e-28
ENSG00000118407.13	4.28542e-26	-1.10939	4.58524e-28
ENSG00000066056.12	4.36948e-26	-1.00814	4.68272e-28
ENSG00000133392.15	4.61347e-26	-1.48867	4.95216e-28
ENSG00000164236.10	4.73406e-26	-0.673499	5.08977e-28
ENSG00000246430.5	5.01399e-26	-0.438809	5.39939e-28
ENSG00000119138.4	5.18133e-26	-0.899667	5.58854e-28
ENSG00000230124.5	5.55111e-26	0.7246	5.99695e-28
ENSG00000068489.11	5.72137e-26	0.945668	6.19076e-28
ENSG00000143493.11	5.89441e-26	0.697196	6.38817e-28
ENSG00000139874.5	6.00327e-26	-0.839252	6.51651e-28
ENSG00000177888.7	6.14911e-26	0.716743	6.68543e-28
ENSG00000264230.6	6.2553e-26	-0.574782	6.81167e-28
ENSG00000011347.8	6.4633e-26	1.50825	7.04934e-28
ENSG00000100522.7	6.68831e-26	0.764486	7.30628e-28
ENSG00000115602.15	7.68157e-26	-1.2109	8.40457e-28
ENSG00000272620.1	7.78449e-26	1.71963	8.53062e-28
ENSG00000072657.7	7.93783e-26	-0.521939	8.71235e-28
ENSG00000136732.13	8.0933e-26	-0.92536	8.89696e-28
ENSG00000111058.6	8.64957e-26	-1.04781	9.5234e-28
ENSG00000101003.9	8.97628e-26	0.88972	9.8986e-28
ENSG00000151725.10	9.07832e-26	0.898812	1.00268e-27
ENSG00000145990.9	9.4159e-26	-0.971773	1.04321e-27
ENSG00000158270.11	9.4159e-26	-1.13068	1.04222e-27
ENSG00000143110.10	9.47171e-26	-0.97833	1.05103e-27
ENSG00000067704.9	9.83123e-26	0.732077	1.09262e-27
ENSG00000143374.13	1.00861e-25	0.767844	1.12269e-27
ENSG00000087589.15	1.02358e-25	-0.952574	1.14111e-27
ENSG00000087086.12	1.08852e-25	-5.06168	1.2154e-27
ENSG00000165434.7	1.11178e-25	0.853097	1.24329e-27
ENSG00000146072.6	1.11958e-25	0.951655	1.25393e-27
ENSG00000133466.12	1.15258e-25	1.11148	1.29289e-27
ENSG00000132680.9	1.24239e-25	0.802725	1.39578e-27
ENSG00000203878.10	1.25802e-25	-0.785775	1.41551e-27
ENSG00000271447.4	1.29529e-25	-1.06929	1.45968e-27
ENSG00000198624.11	1.35557e-25	-0.934168	1.52995e-27
ENSG00000008441.15	1.6345e-25	-0.973958	1.84758e-27
ENSG00000166803.9	1.70797e-25	0.943672	1.93357e-27
ENSG00000136153.18	1.85023e-25	-1.37326	2.09782e-27
ENSG00000163362.9	1.95583e-25	1.06073	2.22092e-27
ENSG00000173372.15	1.97107e-25	-1.22629	2.24163e-27
ENSG00000127586.15	2.19135e-25	0.971202	2.49593e-27
ENSG00000136842.12	2.27667e-25	-0.652431	2.59703e-27
ENSG00000111641.9	2.30364e-25	0.752637	2.63178e-27
ENSG00000204220.8	2.67773e-25	0.730714	3.06378e-27
ENSG00000156675.14	2.87828e-25	-1.06175	3.29821e-27
ENSG00000171522.5	2.95845e-25	-0.951877	3.39517e-27
ENSG00000173137.10	3.1058e-25	0.887597	3.56964e-27
ENSG00000169926.8	3.11042e-25	-0.864819	3.58032e-27
ENSG00000132436.10	3.34551e-25	0.84109	3.85669e-27
ENSG00000129353.13	3.35286e-25	-0.775923	3.87095e-27
ENSG00000113594.8	3.41793e-25	-1.09583	3.95198e-27
ENSG00000095002.11	4.31257e-25	0.761983	4.99385e-27
ENSG00000141469.15	4.68993e-25	-0.665262	5.43892e-27
ENSG00000138738.9	4.7167e-25	-0.69482	5.4781e-27
ENSG00000013810.17	4.80267e-25	0.854079	5.58624e-27
ENSG00000151702.15	4.99553e-25	-0.830287	5.82513e-27
ENSG00000165474.5	4.99553e-25	1.23738	5.82781e-27
ENSG00000160753.14	5.05572e-25	0.760843	5.90675e-27
ENSG00000108846.14	5.09827e-25	1.25997	5.96525e-27
ENSG00000139579.11	5.17467e-25	0.730841	6.06358e-27
ENSG00000157778.7	5.28647e-25	0.813338	6.2037e-27
ENSG00000112320.10	5.42066e-25	-0.667892	6.37054e-27
ENSG00000066629.15	5.49879e-25	-0.962205	6.47184e-27
ENSG00000144642.19	5.88866e-25	-0.988278	6.94087e-27
ENSG00000177303.8	5.92186e-25	-0.737621	6.99022e-27
ENSG00000102575.9	6.32812e-25	-1.16106	7.48069e-27
ENSG00000122565.17	6.53252e-25	0.775669	7.7336e-27
ENSG00000126787.11	7.26083e-25	0.900935	8.60835e-27
ENSG00000134962.6	7.34639e-25	-0.541264	8.72246e-27
ENSG00000155660.9	7.42846e-25	1.00776	8.83272e-27
ENSG00000117597.16	7.48778e-25	0.708411	8.91617e-27
ENSG00000053372.4	7.49816e-25	0.718105	8.94147e-27
ENSG00000181649.5	8.08546e-25	1.17418	9.65578e-27
ENSG00000158373.8	8.12754e-25	1.05183	9.72006e-27
ENSG00000101955.13	8.23471e-25	-0.944844	9.86244e-27
ENSG00000173369.14	8.59492e-25	-1.6397	1.03087e-26
ENSG00000185483.10	8.87277e-25	-0.9476	1.06572e-26
ENSG00000172403.9	9.17999e-25	-1.05208	1.10421e-26
ENSG00000138722.8	9.81492e-25	-1.10363	1.18228e-26
ENSG00000161281.9	9.90631e-25	-0.783304	1.19499e-26
ENSG00000146242.7	1.02586e-24	0.794646	1.23926e-26
ENSG00000078596.9	1.05819e-24	-1.03963	1.28014e-26
ENSG00000066855.14	1.17095e-24	0.762744	1.41857e-26
ENSG00000184009.8	1.18587e-24	-4.85829	1.4387e-26
ENSG00000143416.19	1.22858e-24	-1.23837	1.49263e-26
ENSG00000130762.13	1.31513e-24	0.845874	1.60006e-26
ENSG00000138670.15	1.33366e-24	-0.830413	1.6249e-26
ENSG00000157570.10	1.36158e-24	-0.99962	1.66127e-26
ENSG00000213203.2	1.38572e-24	-0.903596	1.69311e-26
ENSG00000175130.6	1.39315e-24	1.0703	1.70459e-26
ENSG00000116005.10	1.63755e-24	-0.710819	2.00645e-26
ENSG00000103034.13	1.64205e-24	-1.06748	2.01481e-26
ENSG00000088926.12	1.66094e-24	-0.572913	2.04085e-26
ENSG00000123352.16	1.68963e-24	0.714272	2.07901e-26
ENSG00000178826.9	1.69108e-24	-0.844131	2.08372e-26
ENSG00000111640.13	1.72229e-24	0.478853	2.12515e-26
ENSG00000249859.6	1.79384e-24	0.88785	2.21653e-26
ENSG00000102935.10	1.83307e-24	-0.652558	2.26817e-26
ENSG00000137547.7	2.02657e-24	0.787518	2.51459e-26
ENSG00000137700.15	2.02657e-24	0.732837	2.51316e-26
ENSG00000120129.5	2.04709e-24	-3.00675	2.54358e-26
ENSG00000048991.15	2.09065e-24	0.67464	2.60131e-26
ENSG00000131462.6	2.30384e-24	0.724473	2.87056e-26
ENSG00000154330.11	2.69706e-24	-1.05291	3.36516e-26
ENSG00000079819.15	2.71793e-24	-0.792713	3.39589e-26
ENSG00000138735.14	2.75127e-24	-0.869159	3.44229e-26
ENSG00000168079.15	2.76457e-24	-1.03954	3.46371e-26
ENSG00000141696.11	3.41703e-24	0.983463	4.29296e-26
ENSG00000175662.16	3.41703e-24	-0.761318	4.2895e-26
ENSG00000188486.3	3.59494e-24	0.794393	4.52268e-26
ENSG00000205795.4	3.92521e-24	-0.811849	4.94496e-26
ENSG00000197405.6	3.93573e-24	-0.985332	4.96501e-26
ENSG00000179889.17	4.10395e-24	0.757738	5.18429e-26
ENSG00000049283.16	4.15129e-24	1.01632	5.25127e-26
ENSG00000068615.15	4.15305e-24	-0.650689	5.26065e-26
ENSG00000117791.14	4.16854e-24	-0.907778	5.28747e-26
ENSG00000172262.10	4.40685e-24	0.682243	5.59736e-26
ENSG00000106077.17	4.45589e-24	0.808966	5.66733e-26
ENSG00000116191.16	4.51521e-24	0.912308	5.75056e-26
ENSG00000154678.15	4.92531e-24	-0.607825	6.28137e-26
ENSG00000159200.16	4.92794e-24	-0.86013	6.29323e-26
ENSG00000145194.16	4.94841e-24	0.813084	6.32791e-26
ENSG00000148848.13	5.01508e-24	1.15302	6.42182e-26
ENSG00000184500.13	5.08056e-24	-0.937779	6.51443e-26
ENSG00000143633.11	5.29333e-24	0.6837	6.7964e-26
ENSG00000108106.12	5.4443e-24	0.967211	6.99963e-26
ENSG00000183283.14	5.56864e-24	-0.723238	7.1691e-26
ENSG00000186193.8	5.60916e-24	0.914019	7.23095e-26
ENSG00000152455.14	6.25924e-24	0.710154	8.07978e-26
ENSG00000046889.17	6.31922e-24	-1.00916	8.16811e-26
ENSG00000118507.14	6.7654e-24	-0.681483	8.75652e-26
ENSG00000124664.9	6.96322e-24	1.33008	9.02457e-26
ENSG00000085978.20	7.05145e-24	0.686457	9.15109e-26
ENSG00000198682.11	7.47296e-24	-0.897703	9.711e-26
ENSG00000137575.10	7.67005e-24	-0.684334	9.98035e-26
ENSG00000137809.15	8.01541e-24	1.27299	1.04436e-25
ENSG00000178568.12	8.22757e-24	-0.647077	1.07342e-25
ENSG00000114631.10	8.92721e-24	1.39823	1.16624e-25
ENSG00000124920.12	1.00236e-23	-1.29777	1.3112e-25
ENSG00000136869.13	1.07644e-23	-0.940314	1.40996e-25
ENSG00000120457.10	1.1909e-23	-0.942721	1.56195e-25
ENSG00000185291.9	1.20665e-23	-0.856518	1.58469e-25
ENSG00000118523.5	1.21032e-23	-1.76268	1.5916e-25
ENSG00000198753.10	1.22942e-23	1.05607	1.61884e-25
ENSG00000106809.9	1.23134e-23	-1.03231	1.62348e-25
ENSG00000065675.13	1.2385e-23	-0.674006	1.63506e-25
ENSG00000169241.16	1.3342e-23	0.902614	1.7637e-25
ENSG00000279453.1	1.42138e-23	-0.671281	1.88141e-25
ENSG00000156531.15	1.45233e-23	0.669032	1.92738e-25
ENSG00000162433.13	1.45233e-23	1.16398	1.92623e-25
ENSG00000172201.9	1.50909e-23	-1.06678	2.00531e-25
ENSG00000152137.5	1.53825e-23	-1.08877	2.04672e-25
ENSG00000129235.9	1.55549e-23	0.914114	2.07234e-25
ENSG00000124785.7	1.63678e-23	-0.874671	2.18346e-25
ENSG00000058804.11	1.70138e-23	0.706415	2.27258e-25
ENSG00000185507.18	1.7155e-23	0.772691	2.2944e-25
ENSG00000134285.9	1.90873e-23	0.827784	2.55613e-25
ENSG00000167513.7	1.99173e-23	0.923111	2.67071e-25
ENSG00000173848.17	2.01086e-23	0.837383	2.69984e-25
ENSG00000171792.9	2.10495e-23	0.702677	2.8298e-25
ENSG00000137309.18	2.1124e-23	1.03364	2.84346e-25
ENSG00000137960.5	2.51629e-23	-0.605322	3.39147e-25
ENSG00000070731.8	2.52399e-23	-1.00634	3.40621e-25
ENSG00000210082.2	2.90944e-23	-4.97494	3.93141e-25
ENSG00000112419.13	3.67424e-23	-0.707714	4.97119e-25
ENSG00000154127.8	3.81299e-23	-0.983526	5.1655e-25
ENSG00000159176.12	4.14039e-23	-0.7393	5.61617e-25
ENSG00000013297.9	4.20818e-23	-0.63412	5.71538e-25
ENSG00000186594.11	4.31641e-23	-0.816696	5.86983e-25
ENSG00000071282.10	4.37351e-23	-0.803168	5.95503e-25
ENSG00000176971.3	4.37351e-23	-1.0428	5.96257e-25
ENSG00000001167.13	4.64327e-23	0.670996	6.33836e-25
ENSG00000073712.12	4.67866e-23	-0.711104	6.39474e-25
ENSG00000142871.14	4.74952e-23	-2.04508	6.49979e-25
ENSG00000117593.9	4.872e-23	0.699065	6.67581e-25
ENSG00000112312.8	4.9863e-23	0.782259	6.84105e-25
ENSG00000104783.10	5.07977e-23	1.41879	6.97804e-25
ENSG00000185803.7	5.5402e-23	0.738254	7.6201e-25
ENSG00000080546.12	5.69141e-23	-0.793886	7.8379e-25
ENSG00000035664.10	5.89968e-23	-0.981815	8.13489e-25
ENSG00000138035.13	6.4474e-23	0.722477	8.90125e-25
ENSG00000220205.7	6.48317e-23	-0.737906	8.96182e-25
ENSG00000165996.12	7.21641e-23	-0.635007	9.98785e-25
ENSG00000130224.13	7.39312e-23	-0.634247	1.02579e-24
ENSG00000149131.14	7.39312e-23	-1.46127	1.02516e-24
ENSG00000167088.9	8.05145e-23	0.733185	1.11853e-24
ENSG00000109065.10	8.08156e-23	0.700681	1.1241e-24
ENSG00000116212.13	8.22151e-23	0.671028	1.14499e-24
ENSG00000113231.12	8.35559e-23	-0.683605	1.16511e-24
ENSG00000139112.9	8.47407e-23	-0.744654	1.18309e-24
ENSG00000235501.4	8.86715e-23	-0.656677	1.2395e-24
ENSG00000117411.15	9.01563e-23	0.726438	1.26181e-24
ENSG00000115364.12	9.32384e-23	0.654301	1.30655e-24
ENSG00000165304.6	9.53718e-23	0.865421	1.33809e-24
ENSG00000185010.12	9.56956e-23	-0.892698	1.34429e-24
ENSG00000091073.18	9.64876e-23	0.773832	1.35708e-24
ENSG00000174099.9	9.8733e-23	-0.933851	1.39037e-24
ENSG00000019102.10	9.89601e-23	-1.10144	1.39527e-24
ENSG00000155265.9	1.00995e-22	1.0856	1.4257e-24
ENSG00000124602.8	1.01633e-22	0.919626	1.43646e-24
ENSG00000169174.10	1.0393e-22	-1.06824	1.47072e-24
ENSG00000101916.11	1.10598e-22	-0.905211	1.567e-24
ENSG00000107833.9	1.14717e-22	0.916712	1.62734e-24
ENSG00000078269.12	1.15192e-22	0.813243	1.63606e-24
ENSG00000101280.7	1.16839e-22	-0.41999	1.66147e-24
ENSG00000197852.9	1.20513e-22	-0.650594	1.71579e-24
ENSG00000165704.13	1.23187e-22	0.719373	1.75599e-24
ENSG00000067177.13	1.23611e-22	0.838936	1.76417e-24
ENSG00000109805.8	1.24133e-22	0.859813	1.77376e-24
ENSG00000141570.9	1.25515e-22	0.778425	1.79568e-24
ENSG00000109771.14	1.28431e-22	-0.675622	1.83961e-24
ENSG00000261269.1	1.28683e-22	-0.542753	1.84544e-24
ENSG00000123178.13	1.33815e-22	-0.705877	1.92134e-24
ENSG00000005175.8	1.35487e-22	0.654079	1.94769e-24
ENSG00000167767.12	1.36013e-22	1.23045	1.9576e-24
ENSG00000140945.14	1.37493e-22	-0.987866	1.98127e-24
ENSG00000136875.11	1.39436e-22	0.67936	2.01168e-24
ENSG00000186141.7	1.49327e-22	0.668905	2.15696e-24
ENSG00000147443.11	1.64326e-22	-0.996008	2.37644e-24
ENSG00000155438.10	1.7809e-22	0.699794	2.57857e-24
ENSG00000100625.8	1.80537e-22	0.895802	2.61711e-24
ENSG00000123485.10	1.87579e-22	0.884112	2.72242e-24
ENSG00000197008.8	1.88072e-22	0.700808	2.73283e-24
ENSG00000147535.15	1.89335e-22	0.76683	2.75445e-24
ENSG00000064205.9	1.94716e-22	-1.06862	2.83609e-24
ENSG00000163755.7	1.97581e-22	0.686203	2.88124e-24
ENSG00000100060.16	2.00866e-22	-0.855188	2.9326e-24
ENSG00000174059.15	2.05338e-22	-0.802693	3.00144e-24
ENSG00000115641.17	2.36371e-22	1.10981	3.45913e-24
ENSG00000108924.12	2.38369e-22	-0.989894	3.49248e-24
ENSG00000156970.11	2.46854e-22	0.85221	3.62106e-24
ENSG00000157992.11	2.50082e-22	0.788785	3.67272e-24
ENSG00000180871.6	2.63975e-22	-0.529415	3.88132e-24
ENSG00000101464.9	2.64155e-22	0.669159	3.88852e-24
ENSG00000160408.13	2.85542e-22	-0.755109	4.20828e-24
ENSG00000077232.15	2.91126e-22	0.763726	4.29561e-24
ENSG00000101146.11	3.02868e-22	0.685601	4.47408e-24
ENSG00000117650.11	3.0631e-22	0.850467	4.53525e-24
ENSG00000185842.13	3.0631e-22	0.719626	4.5355e-24
ENSG00000100243.19	3.11171e-22	-0.779914	4.61284e-24
ENSG00000135127.10	3.1143e-22	0.987518	4.62206e-24
ENSG00000065911.10	3.14247e-22	0.853287	4.66929e-24
ENSG00000105865.9	3.15238e-22	0.676636	4.68945e-24
ENSG00000145354.8	3.26983e-22	0.699794	4.86982e-24
ENSG00000138074.13	3.27862e-22	0.698812	4.88856e-24
ENSG00000178295.13	3.43439e-22	0.747632	5.12676e-24
ENSG00000042980.11	3.5423e-22	1.145	5.29395e-24
ENSG00000105821.13	3.64577e-22	0.646729	5.45487e-24
ENSG00000118946.10	3.65669e-22	-0.923998	5.47752e-24
ENSG00000204161.12	3.82873e-22	-0.86786	5.74184e-24
ENSG00000143324.12	3.90711e-22	0.854712	5.86612e-24
ENSG00000153046.16	3.9451e-22	0.672264	5.92997e-24
ENSG00000121068.12	4.06945e-22	-0.979471	6.12392e-24
ENSG00000135476.10	4.31503e-22	0.848598	6.50091e-24
ENSG00000137941.15	4.34228e-22	-0.755394	6.54947e-24
ENSG00000161940.9	4.78797e-22	-0.908253	7.22997e-24
ENSG00000141582.13	4.80063e-22	0.716997	7.25736e-24
ENSG00000131634.12	4.80637e-22	-0.913639	7.27433e-24
ENSG00000047457.12	4.87281e-22	1.69092	7.38331e-24
ENSG00000176438.11	5.03545e-22	-0.934896	7.63842e-24
ENSG00000164647.7	5.27979e-22	1.07812	8.01817e-24
ENSG00000059573.7	5.31368e-22	0.719278	8.07881e-24
ENSG00000186074.17	5.33571e-22	-0.90971	8.12152e-24
ENSG00000102921.6	5.52591e-22	-0.620022	8.42057e-24
ENSG00000160593.16	5.57706e-22	-0.937589	8.50812e-24
ENSG00000122707.10	5.77761e-22	-0.782861	8.84162e-24
ENSG00000157181.13	5.77761e-22	0.652431	8.84399e-24
ENSG00000187688.13	5.77761e-22	-0.866688	8.82876e-24
ENSG00000006118.13	5.83189e-22	0.963377	8.93714e-24
ENSG00000078098.12	5.9449e-22	1.0102	9.12059e-24
ENSG00000205038.10	5.97247e-22	-0.529415	9.17319e-24
ENSG00000108179.12	5.97467e-22	0.701758	9.18688e-24
ENSG00000173207.11	6.10734e-22	0.89501	9.40142e-24
ENSG00000169554.15	6.18729e-22	-0.776525	9.53517e-24
ENSG00000102547.17	6.49519e-22	-0.787486	1.00209e-23
ENSG00000046604.11	6.94936e-22	0.823792	1.07336e-23
ENSG00000137710.13	7.05203e-22	-0.665421	1.09043e-23
ENSG00000213088.8	7.10639e-22	-1.19525	1.10006e-23
ENSG00000171124.11	7.16283e-22	1.10851	1.11004e-23
ENSG00000136205.15	7.25296e-22	-0.781879	1.12526e-23
ENSG00000172037.12	7.44067e-22	-0.814541	1.15566e-23
ENSG00000143621.15	7.47496e-22	0.692412	1.16228e-23
ENSG00000146966.11	7.58513e-22	-0.894757	1.18072e-23
ENSG00000152766.5	7.81164e-22	0.977443	1.21733e-23
ENSG00000137486.15	8.00926e-22	-0.811183	1.2495e-23
ENSG00000176102.10	8.07293e-22	0.620561	1.26083e-23
ENSG00000255717.5	8.53315e-22	0.761381	1.33418e-23
ENSG00000144231.9	8.65946e-22	0.602946	1.35542e-23
ENSG00000133872.12	9.09939e-22	-0.706891	1.42585e-23
ENSG00000003249.12	1.03228e-21	0.994076	1.61934e-23
ENSG00000125885.12	1.03815e-21	0.763821	1.63034e-23
ENSG00000008300.13	1.07755e-21	0.925234	1.69407e-23
ENSG00000120738.7	1.0914e-21	-2.75584	1.71774e-23
ENSG00000125910.5	1.11012e-21	-0.759512	1.74911e-23
ENSG00000082175.13	1.12882e-21	-0.559956	1.78053e-23
ENSG00000182782.7	1.23966e-21	-0.680374	1.95749e-23
ENSG00000076248.9	1.29685e-21	0.690702	2.05003e-23
ENSG00000173715.14	1.32929e-21	0.743228	2.1036e-23
ENSG00000165689.15	1.34105e-21	0.691335	2.12454e-23
ENSG00000100426.6	1.44492e-21	0.649834	2.29159e-23
ENSG00000072571.18	1.77921e-21	0.82978	2.82482e-23
ENSG00000120254.14	1.80164e-21	0.664914	2.86355e-23
ENSG00000169218.12	1.91971e-21	-0.365405	3.05451e-23
ENSG00000120833.12	1.99585e-21	-1.15866	3.17911e-23
ENSG00000188921.13	2.00262e-21	-0.771709	3.19335e-23
ENSG00000128016.5	2.02477e-21	-2.33312	3.23217e-23
ENSG00000137573.12	2.0873e-21	1.28345	3.33559e-23
ENSG00000168542.11	2.30574e-21	0.97776	3.68864e-23
ENSG00000148606.11	2.34077e-21	0.663425	3.74872e-23
ENSG00000183722.7	2.47186e-21	-0.794297	3.96292e-23
ENSG00000120509.9	2.52971e-21	0.700048	4.06003e-23
ENSG00000255399.3	2.59562e-21	-0.736575	4.1703e-23
ENSG00000137819.12	2.7467e-21	-0.962205	4.41777e-23
ENSG00000117139.15	2.79067e-21	0.688484	4.49331e-23
ENSG00000187323.10	3.01472e-21	-0.484176	4.85926e-23
ENSG00000214160.8	3.03024e-21	0.6837	4.8895e-23
ENSG00000174640.11	3.26767e-21	-1.18568	5.27826e-23
ENSG00000116957.11	3.37801e-21	0.635514	5.46233e-23
ENSG00000180329.12	3.38456e-21	0.616822	5.47876e-23
ENSG00000154124.4	3.39272e-21	0.668779	5.49782e-23
ENSG00000144285.14	3.73085e-21	-0.601837	6.05219e-23
ENSG00000163431.12	3.84505e-21	-1.00348	6.24408e-23
ENSG00000169282.16	4.22696e-21	-0.506986	6.87156e-23
ENSG00000100234.11	4.39935e-21	-0.985997	7.1594e-23
ENSG00000157510.12	4.46906e-21	-0.825249	7.28055e-23
ENSG00000124813.19	4.48516e-21	0.887819	7.31453e-23
ENSG00000121152.8	4.68113e-21	0.799873	7.6422e-23
ENSG00000174442.10	4.711e-21	0.622873	7.6991e-23
ENSG00000186642.14	4.81066e-21	-0.806495	7.87026e-23
ENSG00000106344.7	4.95713e-21	0.659179	8.11844e-23
ENSG00000108821.12	5.05921e-21	0.871693	8.29435e-23
ENSG00000121552.3	5.08314e-21	-0.692349	8.34236e-23
ENSG00000139835.12	5.11586e-21	0.80697	8.4049e-23
ENSG00000116701.13	5.28495e-21	-0.926184	8.70092e-23
ENSG00000147655.9	5.28495e-21	-0.493775	8.69953e-23
ENSG00000116690.10	5.31867e-21	-1.19097	8.76563e-23
ENSG00000182985.15	5.34072e-21	-1.04277	8.81119e-23
ENSG00000145287.9	5.37985e-21	-0.938159	8.88503e-23
ENSG00000144891.16	5.55438e-21	-0.505116	9.18285e-23
ENSG00000138311.14	5.74663e-21	-0.471091	9.51061e-23
ENSG00000011465.15	5.88793e-21	-2.81099	9.75461e-23
ENSG00000106541.10	6.4025e-21	1.08345	1.06182e-22
ENSG00000112242.13	6.86064e-21	0.728243	1.13898e-22
ENSG00000143436.9	7.00226e-21	0.634722	1.1637e-22
ENSG00000184216.10	7.04443e-21	0.756122	1.17192e-22
ENSG00000162520.13	7.06636e-21	-0.488041	1.17679e-22
ENSG00000152661.7	7.3358e-21	-0.943703	1.22293e-22
ENSG00000198576.3	7.36107e-21	-0.565183	1.22841e-22
ENSG00000247077.5	7.41124e-21	0.694915	1.23806e-22
ENSG00000024422.10	7.41261e-21	-0.95061	1.23957e-22
ENSG00000127528.5	7.46455e-21	-0.969492	1.24955e-22
ENSG00000148082.8	8.06955e-21	-0.945731	1.35361e-22
ENSG00000162614.17	8.06955e-21	-0.822747	1.35312e-22
ENSG00000108395.12	8.32985e-21	0.657564	1.39871e-22
ENSG00000117245.11	8.4135e-21	-0.465357	1.4142e-22
ENSG00000151414.13	8.70973e-21	-0.637605	1.4655e-22
ENSG00000107815.6	8.74232e-21	0.723333	1.47249e-22
ENSG00000071539.12	8.81567e-21	0.976683	1.48637e-22
ENSG00000154258.15	9.13182e-21	-0.584508	1.54125e-22
ENSG00000119888.9	9.24804e-21	0.75004	1.56246e-22
ENSG00000165092.11	9.4734e-21	-1.02344	1.60217e-22
ENSG00000111412.5	9.54699e-21	-0.655948	1.61626e-22
ENSG00000183317.15	1.02341e-20	0.77757	1.73436e-22
ENSG00000123094.14	1.03427e-20	-0.770093	1.75455e-22
ENSG00000000460.15	1.03763e-20	0.629907	1.76204e-22
ENSG00000160606.9	1.05978e-20	0.943894	1.80148e-22
ENSG00000166106.3	1.0874e-20	-0.675748	1.8503e-22
ENSG00000143476.16	1.09409e-20	0.838112	1.86358e-22
ENSG00000141198.12	1.14014e-20	0.696182	1.94399e-22
ENSG00000109339.17	1.14062e-20	-0.582797	1.94676e-22
ENSG00000135929.7	1.15264e-20	-1.04125	1.96926e-22
ENSG00000105131.6	1.22287e-20	0.939807	2.09137e-22
ENSG00000164818.14	1.24663e-20	0.669254	2.13416e-22
ENSG00000123415.13	1.2793e-20	0.682496	2.19229e-22
ENSG00000144278.13	1.29053e-20	-0.547252	2.21376e-22
ENSG00000164631.17	1.3104e-20	0.64958	2.2501e-22
ENSG00000039523.16	1.32776e-20	-0.75834	2.28221e-22
ENSG00000159166.12	1.53043e-20	0.925645	2.63321e-22
ENSG00000179051.12	1.53801e-20	0.727705	2.6489e-22
ENSG00000163082.9	1.54472e-20	0.806938	2.66313e-22
ENSG00000106367.12	1.65166e-20	0.687185	2.85035e-22
ENSG00000068831.17	1.67007e-20	-0.669539	2.885e-22
ENSG00000138434.15	1.68799e-20	-0.74383	2.91887e-22
ENSG00000163472.17	1.72506e-20	0.691209	2.98594e-22
ENSG00000116147.15	1.73643e-20	-0.446412	3.00863e-22
ENSG00000166523.6	1.76713e-20	-0.612926	3.06486e-22
ENSG00000125630.14	1.77099e-20	0.620434	3.07462e-22
ENSG00000102030.14	1.86295e-20	0.689213	3.23749e-22
ENSG00000103811.14	1.88723e-20	-2.86235	3.28294e-22
ENSG00000119411.10	1.92307e-20	0.631902	3.3486e-22
ENSG00000128918.13	2.01819e-20	-0.718391	3.51772e-22
ENSG00000197879.13	2.0186e-20	-0.706637	3.52191e-22
ENSG00000204577.10	2.08092e-20	-0.624521	3.63423e-22
ENSG00000168389.16	2.16376e-20	-1.04581	3.78265e-22
ENSG00000050344.8	2.18079e-20	0.691209	3.81618e-22
ENSG00000188015.8	2.24384e-20	-0.480437	3.93038e-22
ENSG00000117385.14	2.28388e-20	0.696182	4.00446e-22
ENSG00000181409.10	2.43141e-20	-1.07249	4.26732e-22
ENSG00000186493.10	2.5506e-20	-0.621321	4.48092e-22
ENSG00000121797.9	2.64296e-20	-0.703818	4.64773e-22
ENSG00000136155.15	2.65215e-20	-1.11624	4.66847e-22
ENSG00000135750.13	2.66894e-20	0.60735	4.70263e-22
ENSG00000132031.11	2.73129e-20	-0.954697	4.8172e-22
ENSG00000137364.4	2.76015e-20	0.659908	4.87287e-22
ENSG00000106484.13	2.82404e-20	0.737272	4.99054e-22
ENSG00000152256.12	2.83529e-20	0.733851	5.01531e-22
ENSG00000108370.14	2.84934e-20	-0.397434	5.05491e-22
ENSG00000108381.9	2.84934e-20	-0.397434	5.05491e-22
ENSG00000198087.7	2.84934e-20	0.689846	5.04849e-22
ENSG00000110400.9	2.90229e-20	0.736068	5.15387e-22
ENSG00000163637.10	2.93513e-20	-0.7885	5.21724e-22
ENSG00000169750.7	2.94574e-20	0.807477	5.24118e-22
ENSG00000019186.8	3.01511e-20	1.4243	5.36982e-22
ENSG00000211892.3	3.1073e-20	1.76636	5.53936e-22
ENSG00000248801.5	3.2362e-20	-0.663298	5.77473e-22
ENSG00000160214.11	3.25872e-20	0.635134	5.82056e-22
ENSG00000102890.13	3.287e-20	0.670268	5.87673e-22
ENSG00000149435.11	3.41376e-20	-0.96531	6.10926e-22
ENSG00000144591.16	3.453e-20	0.63846	6.18544e-22
ENSG00000005075.14	3.71681e-20	0.655695	6.66442e-22
ENSG00000138778.10	3.71887e-20	0.742056	6.67454e-22
ENSG00000111816.7	3.80571e-20	0.65769	6.84353e-22
ENSG00000134531.8	3.80571e-20	-1.43178	6.83984e-22
ENSG00000111669.13	3.90107e-20	0.737684	7.02174e-22
ENSG00000138639.16	3.93682e-20	-0.790242	7.09287e-22
ENSG00000148053.14	4.04457e-20	-0.888611	7.29399e-22
ENSG00000160883.9	4.23112e-20	-1.03463	7.63772e-22
ENSG00000012171.16	4.23282e-20	-1.16816	7.64809e-22
ENSG00000140297.11	4.28571e-20	1.26903	7.75105e-22
ENSG00000130518.15	4.47661e-20	-0.96664	8.10403e-22
ENSG00000257727.4	4.58803e-20	0.645113	8.31365e-22
ENSG00000163468.13	4.64065e-20	0.775004	8.41702e-22
ENSG00000239998.4	4.75118e-20	-0.517472	8.62568e-22
ENSG00000162511.7	4.83346e-20	-1.05262	8.7834e-22
ENSG00000143740.13	4.87773e-20	0.630635	8.87228e-22
ENSG00000143850.11	4.9355e-20	0.777063	8.98587e-22
ENSG00000162616.8	5.14671e-20	-0.75362	9.3793e-22
ENSG00000021852.11	5.19857e-20	-0.712625	9.49175e-22
ENSG00000172292.13	5.19857e-20	0.624046	9.49016e-22
ENSG00000165905.15	5.42602e-20	1.12257	9.91639e-22
ENSG00000185298.11	5.63433e-20	0.605734	1.03068e-21
ENSG00000132965.8	5.68075e-20	-1.06662	1.04015e-21
ENSG00000120334.14	6.35472e-20	0.618692	1.16466e-21
ENSG00000144791.8	6.59509e-20	-0.696911	1.20985e-21
ENSG00000136167.12	6.60882e-20	-0.980802	1.21351e-21
ENSG00000069535.13	6.83973e-20	-0.935942	1.25709e-21
ENSG00000049541.9	6.85743e-20	0.639126	1.26152e-21
ENSG00000185090.13	7.09169e-20	0.939173	1.30584e-21
ENSG00000048028.10	7.57817e-20	0.629907	1.39673e-21
ENSG00000151503.11	7.71004e-20	0.633518	1.42236e-21
ENSG00000066735.13	7.91939e-20	-0.600222	1.46235e-21
ENSG00000171488.13	7.95096e-20	-0.75438	1.46955e-21
ENSG00000155846.15	8.49813e-20	-0.700554	1.57215e-21
ENSG00000146918.18	8.61664e-20	0.741708	1.59556e-21
ENSG00000007129.16	8.65984e-20	-0.518327	1.60506e-21
ENSG00000172752.13	8.71407e-20	-0.674006	1.61661e-21
ENSG00000095637.19	8.73818e-20	-0.781689	1.62259e-21
ENSG00000135775.12	9.05355e-20	0.595723	1.68272e-21
ENSG00000196730.11	9.18534e-20	-0.764359	1.7088e-21
ENSG00000162961.12	9.20013e-20	0.640583	1.71314e-21
ENSG00000162896.5	9.34945e-20	-2.55647	1.74256e-21
ENSG00000182195.7	9.41069e-20	0.421923	1.75559e-21
ENSG00000100281.12	9.68923e-20	0.611088	1.80923e-21
ENSG00000119812.17	9.71793e-20	0.591858	1.81626e-21
ENSG00000136518.15	9.76175e-20	0.588975	1.82614e-21
ENSG00000102804.13	9.93638e-20	-0.717725	1.86052e-21
ENSG00000103485.16	1.01415e-19	0.586916	1.90068e-21
ENSG00000101194.16	1.03681e-19	1.04758	1.94494e-21
ENSG00000117475.12	1.05293e-19	0.618565	1.97699e-21
ENSG00000204301.6	1.06974e-19	-0.862823	2.01041e-21
ENSG00000154319.13	1.08506e-19	-1.04644	2.04106e-21
ENSG00000143382.12	1.096e-19	-0.943323	2.06353e-21
ENSG00000138095.17	1.11417e-19	0.667765	2.09967e-21
ENSG00000171163.14	1.2385e-19	0.864724	2.3361e-21
ENSG00000105699.15	1.27753e-19	0.762078	2.41192e-21
ENSG00000111300.8	1.27965e-19	0.605481	2.41813e-21
ENSG00000166912.15	1.3181e-19	-0.648471	2.49307e-21
ENSG00000154760.12	1.35159e-19	0.901822	2.55875e-21
ENSG00000204175.5	1.39143e-19	-0.85674	2.63657e-21
ENSG00000196465.9	1.43843e-19	0.645113	2.72812e-21
ENSG00000157168.17	1.59012e-19	-0.552732	3.01856e-21
ENSG00000068438.13	1.60094e-19	0.64844	3.04187e-21
ENSG00000280339.1	1.60768e-19	-0.405037	3.05744e-21
ENSG00000172260.12	1.81039e-19	-0.679867	3.44608e-21
ENSG00000279117.1	1.85067e-19	-0.974592	3.52594e-21
ENSG00000183615.5	1.87797e-19	-0.584888	3.58118e-21
ENSG00000100307.11	1.93873e-19	-0.751909	3.70039e-21
ENSG00000006747.13	2.07461e-19	0.358625	3.96333e-21
ENSG00000158089.13	2.08044e-19	0.970093	3.97807e-21
ENSG00000116473.13	2.23556e-19	-0.603833	4.27852e-21
ENSG00000139970.15	2.23947e-19	-0.731728	4.28989e-21
ENSG00000049759.15	2.27873e-19	-0.745192	4.36901e-21
ENSG00000136270.12	2.3098e-19	0.671472	4.43257e-21
ENSG00000170632.12	2.34316e-19	0.668145	4.50064e-21
ENSG00000106004.4	2.37358e-19	-0.728465	4.56316e-21
ENSG00000159433.10	2.42221e-19	-0.876445	4.66083e-21
ENSG00000183801.6	2.47279e-19	-0.797054	4.76243e-21
ENSG00000179348.10	2.48064e-19	-0.909869	4.78611e-21
ENSG00000248890.1	2.48064e-19	-0.536037	4.78353e-21
ENSG00000171631.13	2.54389e-19	0.921242	4.91252e-21
ENSG00000213186.6	2.56404e-19	0.657817	4.95587e-21
ENSG00000106123.10	2.63451e-19	-0.620054	5.09661e-21
ENSG00000163235.14	2.74478e-19	0.538444	5.31467e-21
ENSG00000141279.14	2.75206e-19	0.627911	5.33353e-21
ENSG00000074800.12	2.87949e-19	0.143862	5.59043e-21
ENSG00000164850.13	2.87949e-19	-0.661904	5.58777e-21
ENSG00000103356.14	2.9041e-19	0.62978	5.64321e-21
ENSG00000231074.7	2.91055e-19	0.583178	5.66078e-21
ENSG00000112139.13	2.91072e-19	-0.82544	5.66612e-21
ENSG00000173599.12	3.06991e-19	0.761635	5.98131e-21
ENSG00000205364.3	3.1229e-19	-0.757991	6.08994e-21
ENSG00000168496.3	3.13152e-19	0.728117	6.11215e-21
ENSG00000119865.7	3.33878e-19	-0.643498	6.52246e-21
ENSG00000244482.8	3.34558e-19	-0.575289	6.54151e-21
ENSG00000106355.8	3.37985e-19	0.662918	6.61435e-21
ENSG00000160124.8	3.44451e-19	0.697165	6.74683e-21
ENSG00000114993.14	3.4457e-19	0.662664	6.75511e-21
ENSG00000109667.10	3.49696e-19	-0.584888	6.86163e-21
ENSG00000090382.5	3.51476e-19	-2.89149	6.90264e-21
ENSG00000176444.17	3.6078e-19	0.671123	7.09157e-21
ENSG00000070669.15	3.66884e-19	0.708665	7.2179e-21
ENSG00000145284.10	3.67808e-19	-0.961603	7.24241e-21
ENSG00000235505.6	3.70951e-19	-0.560209	7.3107e-21
ENSG00000178695.5	3.76631e-19	-0.774624	7.42915e-21
ENSG00000196684.11	3.94537e-19	0.837447	7.78915e-21
ENSG00000170633.15	3.98796e-19	0.612704	7.88013e-21
ENSG00000114353.15	4.0416e-19	-0.654079	7.99309e-21
ENSG00000127564.15	4.06959e-19	0.719626	8.05547e-21
ENSG00000119147.8	4.08225e-19	-0.571297	8.08757e-21
ENSG00000087274.15	4.08682e-19	-0.580263	8.10367e-21
ENSG00000146757.12	4.15704e-19	0.67125	8.25008e-21
ENSG00000129521.12	4.27056e-19	1.25078	8.48276e-21
ENSG00000164638.9	4.40686e-19	1.05021	8.7611e-21
ENSG00000116698.19	4.41438e-19	0.588658	8.78366e-21
ENSG00000198937.8	4.54725e-19	0.758593	9.05588e-21
ENSG00000131876.15	4.55287e-19	0.590654	9.07494e-21
ENSG00000151208.15	4.63121e-19	0.713005	9.23909e-21
ENSG00000197381.14	4.72099e-19	-0.761128	9.42634e-21
ENSG00000136643.10	4.89779e-19	0.605354	9.78781e-21
ENSG00000113389.14	4.89965e-19	-0.994393	9.79998e-21
ENSG00000177119.14	4.9582e-19	-0.657184	9.92565e-21
ENSG00000184363.8	5.10349e-19	0.774275	1.02253e-20
ENSG00000147027.3	5.10613e-19	-0.844353	1.02394e-20
ENSG00000105185.10	5.18044e-19	0.684207	1.03974e-20
ENSG00000112936.17	5.21807e-19	-1.41137	1.04819e-20
ENSG00000185008.16	5.26769e-19	-0.863583	1.05907e-20
ENSG00000253729.6	5.2925e-19	0.793601	1.06497e-20
ENSG00000130305.15	5.30896e-19	0.620687	1.0692e-20
ENSG00000116128.8	5.50518e-19	0.725709	1.10966e-20
ENSG00000134532.14	5.7334e-19	-0.486298	1.15665e-20
ENSG00000117758.12	5.77179e-19	-0.554221	1.16602e-20
ENSG00000165802.18	5.77179e-19	0.706764	1.16639e-20
ENSG00000056998.17	5.86458e-19	0.764359	1.18615e-20
ENSG00000148541.11	6.04043e-19	-0.488167	1.22276e-20
ENSG00000107736.18	6.0446e-19	-0.636496	1.22465e-20
ENSG00000119280.15	6.06134e-19	-0.738223	1.22909e-20
ENSG00000151490.12	6.10249e-19	-0.695961	1.23849e-20
ENSG00000197646.7	6.71334e-19	-0.62167	1.36361e-20
ENSG00000067057.15	6.78996e-19	0.991193	1.38152e-20
ENSG00000105829.10	6.78996e-19	0.669159	1.38074e-20
ENSG00000130522.5	7.01311e-19	-0.970537	1.42813e-20
ENSG00000132170.18	7.05625e-19	-0.961983	1.43814e-20
ENSG00000204394.11	7.40057e-19	0.704926	1.50959e-20
ENSG00000167874.6	7.78084e-19	-0.456011	1.5885e-20
ENSG00000134352.18	8.46898e-19	-0.667258	1.73045e-20
ENSG00000171943.10	8.9376e-19	-0.604214	1.82775e-20
ENSG00000189159.14	9.05728e-19	0.826929	1.85378e-20
ENSG00000183520.10	9.31951e-19	0.638492	1.90906e-20
ENSG00000197265.7	9.56291e-19	0.60735	1.96057e-20
ENSG00000099204.17	9.61095e-19	-0.857754	1.97208e-20
ENSG00000115806.11	9.67163e-19	0.633867	1.9862e-20
ENSG00000138594.11	9.77027e-19	-0.598004	2.00814e-20
ENSG00000137962.11	9.84025e-19	-0.716712	2.02423e-20
ENSG00000173210.18	9.9811e-19	-0.90179	2.05492e-20
ENSG00000130635.14	1.00049e-18	1.14541	2.06154e-20
ENSG00000137124.6	1.0106e-18	0.676129	2.08413e-20
ENSG00000105486.12	1.01711e-18	0.622303	2.10056e-20
ENSG00000148334.13	1.01711e-18	0.616917	2.10106e-20
ENSG00000163781.11	1.02083e-18	0.641217	2.11051e-20
ENSG00000129451.10	1.03303e-18	-0.682782	2.13751e-20
ENSG00000132688.10	1.03565e-18	-0.900269	2.14472e-20
ENSG00000165795.19	1.04713e-18	-0.878441	2.1703e-20
ENSG00000136731.11	1.07504e-18	0.603738	2.23e-20
ENSG00000143443.9	1.08091e-18	0.713765	2.24405e-20
ENSG00000163535.16	1.08235e-18	0.635514	2.2489e-20
ENSG00000089250.17	1.10695e-18	-0.477079	2.30337e-20
ENSG00000204839.7	1.10695e-18	1.0595	2.30383e-20
ENSG00000188322.4	1.11236e-18	1.08595	2.31702e-20
ENSG00000109743.9	1.13147e-18	-0.590021	2.35878e-20
ENSG00000110628.12	1.15367e-18	0.662189	2.40705e-20
ENSG00000127920.5	1.15773e-18	-0.956312	2.41751e-20
ENSG00000198938.2	1.17253e-18	-4.91624	2.45043e-20
ENSG00000158125.8	1.17655e-18	0.958879	2.46088e-20
ENSG00000066468.19	1.17891e-18	-0.963504	2.46785e-20
ENSG00000138376.9	1.18316e-18	0.667131	2.47879e-20
ENSG00000172236.15	1.23483e-18	-1.00969	2.58918e-20
ENSG00000256525.5	1.26998e-18	0.69444	2.66507e-20
ENSG00000138182.13	1.28321e-18	0.744274	2.69504e-20
ENSG00000197959.12	1.37356e-18	-0.537431	2.88715e-20
ENSG00000185303.14	1.5149e-18	-6.21121	3.18686e-20
ENSG00000167112.9	1.53358e-18	0.649073	3.22882e-20
ENSG00000198668.9	1.59118e-18	-0.525234	3.35283e-20
ENSG00000183248.10	1.64457e-18	0.981784	3.46817e-20
ENSG00000164877.17	1.67007e-18	0.778806	3.52483e-20
ENSG00000143748.16	1.68015e-18	0.575828	3.549e-20
ENSG00000150753.10	1.69029e-18	0.775162	3.57333e-20
ENSG00000110841.12	1.75973e-18	-0.593949	3.72317e-20
ENSG00000142632.15	1.81886e-18	0.688484	3.85142e-20
ENSG00000240972.1	1.87958e-18	0.666149	3.98323e-20
ENSG00000161800.11	1.99308e-18	0.65259	4.22721e-20
ENSG00000101608.11	2.03981e-18	-0.63713	4.32982e-20
ENSG00000149418.9	2.08538e-18	0.833835	4.43017e-20
ENSG00000018408.13	2.14539e-18	-0.670521	4.56136e-20
ENSG00000169255.12	2.17043e-18	-0.834849	4.61834e-20
ENSG00000140832.8	2.17614e-18	0.763187	4.63425e-20
ENSG00000165209.17	2.17633e-18	0.613813	4.6384e-20
ENSG00000182134.14	2.19825e-18	0.643371	4.68892e-20
ENSG00000062038.12	2.20579e-18	1.26555	4.7088e-20
ENSG00000042429.9	2.26928e-18	0.594012	4.84825e-20
ENSG00000181924.6	2.27815e-18	0.669	4.87114e-20
ENSG00000170779.10	2.29329e-18	0.751972	4.90747e-20
ENSG00000018280.15	2.43095e-18	-0.963789	5.20624e-20
ENSG00000112367.9	2.51185e-18	-0.611437	5.38383e-20
ENSG00000162817.6	2.5999e-18	-0.85259	5.57706e-20
ENSG00000106537.7	2.60519e-18	-0.719975	5.5929e-20
ENSG00000203668.1	2.63947e-18	0.695707	5.67104e-20
ENSG00000137168.7	2.7602e-18	0.66466	5.93519e-20
ENSG00000177084.15	2.77482e-18	0.65693	5.97143e-20
ENSG00000204262.10	2.82524e-18	1.08414	6.0848e-20
ENSG00000107317.10	2.892e-18	-1.14554	6.23357e-20
ENSG00000166451.12	2.90332e-18	0.657817	6.26298e-20
ENSG00000196154.10	2.91855e-18	-1.00817	6.30087e-20
ENSG00000122643.17	3.03947e-18	0.633391	6.56718e-20
ENSG00000189057.9	3.05035e-18	0.685981	6.59594e-20
ENSG00000047230.13	3.20536e-18	0.599747	6.93666e-20
ENSG00000175376.7	3.22933e-18	0.595755	6.99412e-20
ENSG00000118246.12	3.29558e-18	0.615428	7.14329e-20
ENSG00000119139.15	3.29785e-18	-0.641977	7.15389e-20
ENSG00000131037.13	3.31923e-18	0.536068	7.20601e-20
ENSG00000162551.12	3.41264e-18	-1.35729	7.41469e-20
ENSG00000247626.4	3.43608e-18	0.642484	7.47153e-20
ENSG00000130755.11	3.48436e-18	-0.832283	7.58254e-20
ENSG00000147251.14	3.50748e-18	-0.687977	7.63891e-20
ENSG00000160818.15	3.513e-18	0.6198	7.65699e-20
ENSG00000108379.8	3.52858e-18	0.680374	7.69704e-20
ENSG00000142207.6	3.53121e-18	0.634595	7.70888e-20
ENSG00000163406.9	3.56026e-18	-0.888611	7.77843e-20
ENSG00000166140.16	3.5721e-18	0.64996	7.81046e-20
ENSG00000172005.9	3.57435e-18	-0.589514	7.82154e-20
ENSG00000117834.11	3.73719e-18	-0.590116	8.18434e-20
ENSG00000047644.16	3.75382e-18	-0.707271	8.22762e-20
ENSG00000144524.16	3.75382e-18	0.613433	8.2337e-20
ENSG00000205336.10	3.89379e-18	0.751022	8.54745e-20
ENSG00000170417.13	3.93818e-18	0.564486	8.65168e-20
ENSG00000232677.5	3.9785e-18	1.00684	8.74712e-20
ENSG00000186185.12	4.04629e-18	0.758879	8.90316e-20
ENSG00000120693.12	4.05215e-18	-0.811247	8.92303e-20
ENSG00000101104.11	4.06717e-18	0.994583	8.96314e-20
ENSG00000105383.13	4.07155e-18	-0.631269	8.9798e-20
ENSG00000165140.8	4.28179e-18	-1.15495	9.45087e-20
ENSG00000125845.6	4.34844e-18	-1.04999	9.6055e-20
ENSG00000169302.13	4.34918e-18	0.976049	9.61464e-20
ENSG00000185515.13	4.35727e-18	0.614827	9.64005e-20
ENSG00000143742.11	4.35902e-18	0.641217	9.65145e-20
ENSG00000163131.9	4.39609e-18	-0.848598	9.7411e-20
ENSG00000267795.4	4.49932e-18	0.944084	9.97761e-20
ENSG00000127952.15	4.53862e-18	0.690955	1.00726e-19
ENSG00000162878.11	4.55747e-18	-0.86051	1.01223e-19
ENSG00000143256.4	4.62281e-18	0.649929	1.02783e-19
ENSG00000168874.11	4.62281e-18	-1.22671	1.02834e-19
ENSG00000196611.4	4.64492e-18	1.45905	1.03406e-19
ENSG00000149428.17	4.649e-18	0.699129	1.03577e-19
ENSG00000127990.14	4.71468e-18	-0.740694	1.05121e-19
ENSG00000198301.10	4.89967e-18	0.608839	1.09331e-19
ENSG00000069122.17	4.97206e-18	-1.01207	1.11032e-19
ENSG00000240184.5	5.00643e-18	-0.824014	1.11886e-19
ENSG00000146038.10	5.04233e-18	-0.54665	1.12775e-19
ENSG00000151806.12	5.07291e-18	0.575574	1.13546e-19
ENSG00000121361.3	5.13239e-18	-0.815017	1.14966e-19
ENSG00000102934.8	5.17411e-18	-0.893236	1.1599e-19
ENSG00000164530.12	5.29968e-18	-0.531285	1.18897e-19
ENSG00000173198.5	5.31951e-18	-0.504166	1.19433e-19
ENSG00000108387.13	5.34259e-18	-0.740599	1.20044e-19
ENSG00000182173.11	5.66131e-18	0.636243	1.27303e-19
ENSG00000119508.16	5.75832e-18	-1.17393	1.29583e-19
ENSG00000108342.11	6.17103e-18	-0.959385	1.38978e-19
ENSG00000109881.15	6.18728e-18	0.705782	1.3945e-19
ENSG00000174804.3	6.25123e-18	-0.779471	1.40999e-19
ENSG00000116478.10	6.28835e-18	0.621923	1.41945e-19
ENSG00000124191.16	6.50922e-18	-0.718391	1.47043e-19
ENSG00000108559.10	6.55424e-18	0.630255	1.48173e-19
ENSG00000149260.13	6.81735e-18	0.778077	1.54239e-19
ENSG00000085514.14	6.96637e-18	-0.794202	1.57731e-19
ENSG00000162073.12	6.99841e-18	0.790369	1.58577e-19
ENSG00000196396.8	7.05397e-18	-0.642737	1.59958e-19
ENSG00000143315.6	7.06412e-18	0.577824	1.6031e-19
ENSG00000062716.9	7.10431e-18	0.800697	1.61344e-19
ENSG00000170776.18	7.37863e-18	-0.664755	1.67702e-19
ENSG00000006740.15	7.48707e-18	-0.820434	1.70296e-19
ENSG00000064763.9	7.50201e-18	-0.607984	1.70765e-19
ENSG00000169894.16	7.65918e-18	1.27664	1.74475e-19
ENSG00000170439.6	7.81619e-18	0.850341	1.78186e-19
ENSG00000117222.12	7.84602e-18	0.591129	1.79002e-19
ENSG00000188783.5	7.93627e-18	-1.06992	1.81198e-19
ENSG00000154370.12	8.01783e-18	0.620054	1.83198e-19
ENSG00000135540.10	8.02113e-18	-0.728972	1.83412e-19
ENSG00000099958.13	8.15698e-18	1.08991	1.86659e-19
ENSG00000135451.11	8.25234e-18	0.773832	1.88984e-19
ENSG00000144824.18	8.5817e-18	-0.712276	1.96675e-19
ENSG00000163013.10	8.6643e-18	0.810201	1.98717e-19
ENSG00000171241.7	8.71416e-18	0.663425	2.00011e-19
ENSG00000171067.9	8.81843e-18	0.634975	2.02556e-19
ENSG00000171051.7	8.9888e-18	-0.981403	2.06625e-19
ENSG00000123358.18	9.30157e-18	-1.59449	2.13975e-19
ENSG00000016402.11	9.30765e-18	-0.836179	2.14275e-19
ENSG00000065183.14	9.34117e-18	0.601964	2.15208e-19
ENSG00000196628.12	9.65705e-18	-0.634342	2.22653e-19
ENSG00000103175.9	9.70546e-18	-0.674386	2.23936e-19
ENSG00000101447.12	9.7214e-18	0.782671	2.24472e-19
ENSG00000101084.15	1.01916e-17	0.633645	2.35505e-19
ENSG00000160801.12	1.07106e-17	-0.492159	2.47682e-19
ENSG00000204397.6	1.10132e-17	-0.587296	2.54871e-19
ENSG00000080986.11	1.11812e-17	0.66729	2.58952e-19
ENSG00000006704.9	1.1397e-17	0.593886	2.64146e-19
ENSG00000149534.7	1.16762e-17	-0.698685	2.70819e-19
ENSG00000010278.10	1.21198e-17	-0.667163	2.81317e-19
ENSG00000163563.7	1.23172e-17	-0.874133	2.8611e-19
ENSG00000136052.8	1.23259e-17	0.635387	2.86525e-19
ENSG00000008323.14	1.26839e-17	0.779186	2.95065e-19
ENSG00000139343.9	1.30429e-17	0.647584	3.03643e-19
ENSG00000165215.6	1.31195e-17	0.938793	3.05652e-19
ENSG00000174944.7	1.33434e-17	-0.531918	3.111e-19
ENSG00000188706.11	1.35739e-17	0.746523	3.16707e-19
ENSG00000168488.17	1.36551e-17	0.653192	3.18838e-19
ENSG00000153071.13	1.38766e-17	-0.746143	3.2425e-19
ENSG00000158352.14	1.40308e-17	-0.862316	3.28094e-19
ENSG00000167123.17	1.40605e-17	0.808332	3.29031e-19
ENSG00000233476.3	1.44978e-17	-0.902012	3.39514e-19
ENSG00000103460.15	1.45132e-17	1.07001	3.40125e-19
ENSG00000137812.18	1.45795e-17	0.631776	3.41931e-19
ENSG00000109099.12	1.46803e-17	-0.710756	3.44549e-19
ENSG00000198952.8	1.51328e-17	0.655061	3.5543e-19
ENSG00000026508.15	1.55887e-17	-1.11408	3.66406e-19
ENSG00000140807.5	1.56918e-17	-0.740947	3.69102e-19
ENSG00000141497.12	1.59049e-17	-0.616442	3.74388e-19
ENSG00000198018.6	1.617e-17	0.694789	3.80907e-19
ENSG00000112149.8	1.66608e-17	-0.827689	3.92756e-19
ENSG00000075218.17	1.67753e-17	0.656075	3.95745e-19
ENSG00000157551.16	1.67863e-17	-1.22563	3.96295e-19
ENSG00000104413.14	1.70791e-17	0.613591	4.03501e-19
ENSG00000148158.15	1.71064e-17	-0.75362	4.04442e-19
ENSG00000131153.7	1.72527e-17	0.672897	4.08199e-19
ENSG00000164087.6	1.7516e-17	0.601869	4.14731e-19
ENSG00000006530.14	1.80044e-17	0.595882	4.26604e-19
ENSG00000169188.4	1.83671e-17	0.587771	4.35516e-19
ENSG00000174514.11	1.8803e-17	0.423919	4.46176e-19
ENSG00000088340.14	2.03114e-17	0.893458	4.8232e-19
ENSG00000129675.14	2.04665e-17	-0.661809	4.86356e-19
ENSG00000185565.10	2.05037e-17	-0.822873	4.87593e-19
ENSG00000088387.16	2.06543e-17	-0.677871	4.91533e-19
ENSG00000129467.12	2.09221e-17	-0.787328	4.98266e-19
ENSG00000278535.3	2.20927e-17	0.700048	5.26524e-19
ENSG00000165507.8	2.20932e-17	-1.07258	5.26918e-19
ENSG00000168393.11	2.31665e-17	0.658578	5.52916e-19
ENSG00000138442.8	2.33273e-17	0.57022	5.57157e-19
ENSG00000128641.16	2.33482e-17	-0.573135	5.58058e-19
ENSG00000105894.10	2.38994e-17	-0.524727	5.71646e-19
ENSG00000163975.10	2.396e-17	0.984667	5.7351e-19
ENSG00000012048.18	2.43332e-17	0.775796	5.82862e-19
ENSG00000161955.15	2.54053e-17	-0.713639	6.08981e-19
ENSG00000128039.9	2.61944e-17	0.844448	6.288e-19
ENSG00000154262.11	2.61944e-17	-0.601362	6.28616e-19
ENSG00000060718.17	2.63831e-17	1.35115	6.34343e-19
ENSG00000143977.12	2.63831e-17	0.669507	6.34599e-19
ENSG00000188761.10	2.63831e-17	0.766355	6.34696e-19
ENSG00000156787.15	2.70586e-17	0.598131	6.51879e-19
ENSG00000178078.10	2.70586e-17	0.598384	6.51879e-19
ENSG00000165152.7	2.7752e-17	-0.587169	6.69064e-19
ENSG00000154153.12	2.8219e-17	-0.903374	6.80809e-19
ENSG00000065534.17	2.82767e-17	-0.748551	6.82688e-19
ENSG00000104356.9	2.91702e-17	0.601616	7.04765e-19
ENSG00000104415.12	2.94884e-17	0.753018	7.12961e-19
ENSG00000090447.10	3.04918e-17	0.675843	7.38274e-19
ENSG00000143314.11	3.04918e-17	0.632093	7.37994e-19
ENSG00000136848.15	3.07826e-17	-0.67822	7.45845e-19
ENSG00000172731.12	3.15955e-17	0.638144	7.66088e-19
ENSG00000196247.10	3.16352e-17	0.685316	7.67595e-19
ENSG00000072401.13	3.17836e-17	0.584667	7.71745e-19
ENSG00000196511.12	3.24299e-17	-0.584033	7.87997e-19
ENSG00000144485.9	3.33848e-17	0.904673	8.11776e-19
ENSG00000181019.11	3.35377e-17	1.24591	8.16074e-19
ENSG00000164849.8	3.39433e-17	-0.318296	8.27114e-19
ENSG00000171596.6	3.39433e-17	-0.318296	8.27114e-19
ENSG00000161016.14	3.44437e-17	0.00478378	8.39901e-19
ENSG00000109458.7	3.50505e-17	-0.638999	8.55304e-19
ENSG00000099194.5	3.50689e-17	-1.63827	8.56359e-19
ENSG00000137203.9	3.64682e-17	0.818565	8.91156e-19
ENSG00000171155.7	3.68468e-17	0.623285	9.01045e-19
ENSG00000100968.12	3.68938e-17	0.601489	9.0283e-19
ENSG00000134954.13	3.88014e-17	-0.729986	9.50181e-19
ENSG00000092470.10	3.93842e-17	0.648091	9.65133e-19
ENSG00000106992.16	3.94595e-17	-0.802344	9.67659e-19
ENSG00000108651.8	3.96684e-17	0.49539	9.73467e-19
ENSG00000100908.12	4.02204e-17	0.667765	9.87707e-19
ENSG00000096696.12	4.06141e-17	1.1413	9.98076e-19
ENSG00000276180.1	4.06597e-17	0.739807	9.99897e-19
ENSG00000109906.12	4.07107e-17	-0.909805	1.00186e-18
ENSG00000171033.11	4.12856e-17	-0.545794	1.01672e-18
ENSG00000172590.17	4.13402e-17	0.666149	1.01877e-18
ENSG00000158793.12	4.27099e-17	0.608459	1.05326e-18
ENSG00000175711.7	4.29524e-17	0.614827	1.05998e-18
ENSG00000182389.17	4.3372e-17	-0.49067	1.07109e-18
ENSG00000007923.14	4.39794e-17	0.582417	1.08685e-18
ENSG00000115902.9	4.45485e-17	0.675368	1.10168e-18
ENSG00000126218.10	4.52913e-17	-0.447046	1.12083e-18
ENSG00000242732.4	4.55281e-17	-0.428037	1.12748e-18
ENSG00000205937.10	4.56118e-17	0.590401	1.13034e-18
ENSG00000196233.10	4.57681e-17	0.579313	1.135e-18
ENSG00000133488.13	4.59807e-17	-0.592872	1.14107e-18
ENSG00000196305.16	4.63885e-17	0.586662	1.15199e-18
ENSG00000124615.16	4.76235e-17	-0.74985	1.18348e-18
ENSG00000137747.13	4.7851e-17	0.593537	1.18996e-18
ENSG00000104763.16	4.93368e-17	-0.57757	1.22776e-18
ENSG00000137343.16	5.00298e-17	0.734548	1.24587e-18
ENSG00000133216.15	5.05447e-17	1.00542	1.25956e-18
ENSG00000182667.13	5.12938e-17	-0.643054	1.27911e-18
ENSG00000166920.9	5.13146e-17	1.29092	1.28052e-18
ENSG00000160767.19	5.24004e-17	0.606336	1.30852e-18
ENSG00000021574.10	5.71113e-17	0.586409	1.42714e-18
ENSG00000172009.13	6.10649e-17	0.601616	1.52699e-18
ENSG00000256612.6	6.17605e-17	-0.939807	1.54545e-18
ENSG00000119686.8	6.20017e-17	-0.723333	1.55256e-18
ENSG00000227057.6	6.48191e-17	0.491525	1.62422e-18
ENSG00000115942.7	6.54144e-17	0.579313	1.64027e-18
ENSG00000150977.10	6.70277e-17	-0.609473	1.68188e-18
ENSG00000173473.9	6.75675e-17	0.60697	1.69659e-18
ENSG00000206538.6	6.78771e-17	-0.806843	1.70554e-18
ENSG00000143228.11	6.94642e-17	0.697196	1.74662e-18
ENSG00000078401.6	7.04483e-17	-1.02981	1.77257e-18
ENSG00000151498.10	7.07785e-17	0.735055	1.7821e-18
ENSG00000156873.14	7.17987e-17	0.629273	1.80903e-18
ENSG00000163923.8	7.22161e-17	0.796008	1.82079e-18
ENSG00000145050.14	7.35718e-17	0.625091	1.85624e-18
ENSG00000104695.11	7.38753e-17	-0.602978	1.86518e-18
ENSG00000080608.9	7.4612e-17	0.566228	1.88507e-18
ENSG00000162631.17	7.58684e-17	-0.452653	1.91812e-18
ENSG00000117009.10	7.97827e-17	-0.562458	2.01846e-18
ENSG00000085265.9	7.97849e-17	-0.922319	2.01989e-18
ENSG00000120896.12	8.1201e-17	-0.714367	2.05714e-18
ENSG00000073150.12	8.38229e-17	0.824172	2.12501e-18
ENSG00000197496.5	8.49248e-17	0.285601	2.15441e-18
ENSG00000178999.11	8.68405e-17	0.743799	2.20451e-18
ENSG00000163072.13	8.76358e-17	-0.892666	2.22621e-18
ENSG00000082068.7	8.78903e-17	0.586536	2.23419e-18
ENSG00000006576.15	8.89451e-17	0.623539	2.26254e-18
ENSG00000032389.11	8.90119e-17	0.598258	2.26731e-18
ENSG00000184497.11	8.90119e-17	-0.558372	2.26683e-18
ENSG00000064999.13	8.90726e-17	-0.528909	2.27039e-18
ENSG00000162910.17	8.98949e-17	0.610962	2.29291e-18
ENSG00000072864.11	9.10082e-17	0.594519	2.32287e-18
ENSG00000103089.7	9.23032e-17	0.982037	2.35752e-18
ENSG00000160193.10	9.36838e-17	0.632504	2.3944e-18
ENSG00000160072.18	9.391e-17	0.774497	2.4018e-18
ENSG00000172264.15	9.4026e-17	-0.947632	2.40639e-18
ENSG00000101126.14	9.43758e-17	0.558752	2.41697e-18
ENSG00000173992.7	9.44463e-17	0.577063	2.4204e-18
ENSG00000235750.8	9.62046e-17	-0.565912	2.46712e-18
ENSG00000038295.6	9.82231e-17	-0.478821	2.52058e-18
ENSG00000242125.3	9.8904e-17	0.789324	2.53976e-18
ENSG00000118495.17	9.92183e-17	-0.800095	2.54955e-18
ENSG00000013588.5	1.00401e-16	-4.98264	2.58166e-18
ENSG00000027847.12	1.02933e-16	0.611088	2.64855e-18
ENSG00000118564.13	1.04048e-16	-0.582417	2.67904e-18
ENSG00000018625.13	1.04966e-16	-0.507239	2.70449e-18
ENSG00000175054.13	1.066e-16	0.580802	2.74843e-18
ENSG00000180879.12	1.13282e-16	0.768541	2.92265e-18
ENSG00000187479.5	1.16972e-16	-0.968383	3.01989e-18
ENSG00000133574.8	1.19687e-16	-0.734358	3.09203e-18
ENSG00000114698.13	1.20328e-16	-0.698812	3.11275e-18
ENSG00000128534.6	1.20328e-16	0.558752	3.11073e-18
ENSG00000163811.10	1.2096e-16	0.504736	3.1312e-18
ENSG00000000003.13	1.28364e-16	0.646919	3.32507e-18
ENSG00000151474.18	1.28765e-16	-0.656011	3.33768e-18
ENSG00000123146.18	1.2992e-16	-0.794804	3.36985e-18
ENSG00000178175.10	1.3341e-16	-0.38435	3.46268e-18
ENSG00000184992.10	1.38436e-16	0.605734	3.59552e-18
ENSG00000183605.15	1.47119e-16	0.678536	3.82357e-18
ENSG00000185414.18	1.47865e-16	0.575701	3.84553e-18
ENSG00000113504.18	1.62998e-16	0.736195	4.2419e-18
ENSG00000150764.12	1.65348e-16	-0.67597	4.30591e-18
ENSG00000161929.13	1.65365e-16	-0.676034	4.30921e-18
ENSG00000169607.11	1.69402e-16	0.626168	4.41731e-18
ENSG00000158315.9	1.70846e-16	0.655948	4.45793e-18
ENSG00000075702.15	1.71456e-16	0.715761	4.4768e-18
ENSG00000165410.13	1.72896e-16	-0.666308	4.5174e-18
ENSG00000010671.14	1.75465e-16	-0.786251	4.58754e-18
ENSG00000108469.13	1.92451e-16	0.633265	5.03496e-18
ENSG00000161921.13	1.95922e-16	-0.711072	5.12914e-18
ENSG00000185532.13	1.9695e-16	-0.769523	5.15945e-18
ENSG00000103710.9	2.04116e-16	-0.774149	5.35071e-18
ENSG00000070756.12	2.05121e-16	0.281831	5.38059e-18
ENSG00000137491.13	2.06182e-16	-0.873784	5.41198e-18
ENSG00000185033.13	2.1151e-16	0.806843	5.5555e-18
ENSG00000018236.13	2.11656e-16	-0.475875	5.56297e-18
ENSG00000182199.9	2.14148e-16	0.670806	5.63217e-18
ENSG00000163751.3	2.19588e-16	-1.02706	5.77904e-18
ENSG00000138769.9	2.21866e-16	-0.349279	5.84281e-18
ENSG00000170345.8	2.25781e-16	-2.69194	5.9498e-18
ENSG00000131370.14	2.25851e-16	-0.749596	5.95555e-18
ENSG00000131171.11	2.3055e-16	-0.55514	6.08343e-18
ENSG00000204536.12	2.33836e-16	0.645747	6.17419e-18
ENSG00000151632.15	2.34743e-16	0.623951	6.20217e-18
ENSG00000072274.11	2.48893e-16	-0.890163	6.58035e-18
ENSG00000106105.12	2.53758e-16	0.610962	6.71333e-18
ENSG00000108622.9	2.54333e-16	-0.696879	6.73295e-18
ENSG00000129538.12	2.55414e-16	-1.86035	6.76597e-18
ENSG00000133103.15	2.55965e-16	0.564233	6.78498e-18
ENSG00000071794.14	2.5725e-16	0.635229	6.82349e-18
ENSG00000103569.8	2.64465e-16	-0.93553	7.01942e-18
ENSG00000108829.9	2.64489e-16	0.598955	7.02461e-18
ENSG00000047849.20	2.7316e-16	-0.611057	7.25962e-18
ENSG00000013306.14	2.73499e-16	0.675115	7.27336e-18
ENSG00000198712.1	2.76955e-16	-4.85753	7.37004e-18
ENSG00000169972.10	2.7748e-16	0.678093	7.38881e-18
ENSG00000163629.11	2.80791e-16	-0.835102	7.48181e-18
ENSG00000228716.5	2.82092e-16	0.635863	7.52134e-18
ENSG00000133398.3	2.8298e-16	0.549533	7.54991e-18
ENSG00000111665.10	2.91182e-16	0.650467	7.77376e-18
ENSG00000123374.9	2.96893e-16	0.595501	7.93135e-18
ENSG00000166224.15	3.04251e-16	0.555267	8.13317e-18
ENSG00000138759.16	3.05291e-16	-0.882085	8.16624e-18
ENSG00000167962.11	3.14822e-16	0.562585	8.42662e-18
ENSG00000138092.9	3.22487e-16	0.639221	8.63734e-18
ENSG00000091844.6	3.22739e-16	0.685981	8.64966e-18
ENSG00000151914.16	3.25478e-16	-0.847521	8.72868e-18
ENSG00000063587.13	3.28608e-16	0.564359	8.8183e-18
ENSG00000243678.10	3.33826e-16	0.594583	8.96408e-18
ENSG00000029153.13	3.44066e-16	1.02911	9.24499e-18
ENSG00000053747.14	3.47378e-16	-0.93157	9.33997e-18
ENSG00000090615.11	3.67374e-16	0.612831	9.88397e-18
ENSG00000235173.5	3.80596e-16	0.641121	1.02463e-17
ENSG00000122852.13	3.86638e-16	-6.35701	1.04156e-17
ENSG00000152990.12	3.94067e-16	0.567464	1.06225e-17
ENSG00000116750.12	3.99638e-16	0.516585	1.07796e-17
ENSG00000182704.7	4.11531e-16	0.84882	1.11075e-17
ENSG00000101347.8	4.19544e-16	-0.716173	1.1331e-17
ENSG00000272734.1	4.20355e-16	-0.503026	1.13602e-17
ENSG00000185049.11	4.3179e-16	0.560969	1.16841e-17
ENSG00000189376.10	4.3179e-16	0.635134	1.16783e-17
ENSG00000256269.5	4.3749e-16	0.619325	1.18459e-17
ENSG00000234281.4	4.4047e-16	-0.329637	1.19342e-17
ENSG00000265107.2	4.45214e-16	-0.8556	1.20704e-17
ENSG00000211896.5	4.46401e-16	0.15023	1.21103e-17
ENSG00000123342.14	4.54927e-16	-0.93968	1.23494e-17
ENSG00000028528.13	4.68074e-16	-0.515888	1.27144e-17
ENSG00000204482.9	4.71199e-16	-0.869888	1.28074e-17
ENSG00000185482.6	4.72981e-16	-0.536037	1.2864e-17
ENSG00000147804.8	4.78672e-16	0.728338	1.30271e-17
ENSG00000158106.11	4.82466e-16	0.933882	1.31386e-17
ENSG00000164654.14	4.8278e-16	0.572945	1.31555e-17
ENSG00000146731.9	4.89089e-16	0.652907	1.33359e-17
ENSG00000119431.8	4.90563e-16	0.574212	1.33845e-17
ENSG00000184349.11	4.92408e-16	0.649358	1.34434e-17
ENSG00000177732.7	5.12685e-16	0.658578	1.40058e-17
ENSG00000243701.4	5.16437e-16	-0.425978	1.41172e-17
ENSG00000133808.4	5.44078e-16	-0.542658	1.48822e-17
ENSG00000109819.7	5.4887e-16	-0.385649	1.50227e-17
ENSG00000198252.10	5.57843e-16	0.571329	1.5278e-17
ENSG00000205581.9	5.60438e-16	0.62639	1.53587e-17
ENSG00000167757.12	5.7476e-16	-0.667607	1.57611e-17
ENSG00000134602.14	5.82221e-16	0.525107	1.59758e-17
ENSG00000113555.5	5.85332e-16	-0.754126	1.60712e-17
ENSG00000184182.17	6.01626e-16	0.58416	1.6529e-17
ENSG00000221829.8	6.0863e-16	0.612894	1.67319e-17
ENSG00000159596.6	6.15359e-16	0.534833	1.69275e-17
ENSG00000110195.10	6.25042e-16	-0.942943	1.72047e-17
ENSG00000131018.21	6.26078e-16	-0.825313	1.7244e-17
ENSG00000132313.13	6.28043e-16	0.582671	1.7309e-17
ENSG00000111962.7	6.28577e-16	-0.486361	1.73345e-17
ENSG00000079335.16	6.40845e-16	-0.538318	1.76853e-17
ENSG00000125872.7	6.40845e-16	-0.829115	1.7695e-17
ENSG00000180921.6	6.4272e-16	0.690227	1.77578e-17
ENSG00000162836.10	6.66264e-16	0.663203	1.84198e-17
ENSG00000084710.12	6.70764e-16	-0.614225	1.85558e-17
ENSG00000058600.14	6.73682e-16	0.545256	1.86481e-17
ENSG00000184156.14	6.74372e-16	0.947854	1.86789e-17
ENSG00000186907.6	6.81992e-16	0.762617	1.89017e-17
ENSG00000084453.15	6.87516e-16	-0.51272	1.90667e-17
ENSG00000077942.16	6.90499e-16	-0.99547	1.9172e-17
ENSG00000137441.7	6.90499e-16	-0.314557	1.91733e-17
ENSG00000244567.1	6.97843e-16	-0.557231	1.93892e-17
ENSG00000166313.17	6.98366e-16	-0.724727	1.94158e-17
ENSG00000136261.13	7.00725e-16	0.569745	1.94935e-17
ENSG00000141580.14	7.36515e-16	0.643973	2.05018e-17
ENSG00000163463.10	7.47524e-16	0.52536	2.08212e-17
ENSG00000136026.12	7.56833e-16	0.617931	2.10935e-17
ENSG00000037897.15	7.85548e-16	0.699857	2.19074e-17
ENSG00000161654.8	7.94382e-16	0.570062	2.21675e-17
ENSG00000133740.9	8.44304e-16	0.681451	2.35751e-17
ENSG00000177542.9	8.49469e-16	0.588658	2.3734e-17
ENSG00000198053.10	8.63773e-16	-0.739648	2.41486e-17
ENSG00000169258.6	8.87775e-16	0.611215	2.48349e-17
ENSG00000261716.1	9.43914e-16	0.709773	2.64216e-17
ENSG00000151012.12	9.51356e-16	1.14117	2.66464e-17
ENSG00000171793.12	9.64752e-16	0.61432	2.70382e-17
ENSG00000198502.5	9.7332e-16	-1.87001	2.72952e-17
ENSG00000112799.7	9.85923e-16	-0.708823	2.76656e-17
ENSG00000070526.13	9.86939e-16	0.88275	2.77111e-17
ENSG00000099899.13	1.00287e-15	0.579059	2.81758e-17
ENSG00000154146.11	1.03699e-15	-1.03441	2.91523e-17
ENSG00000171368.11	1.05889e-15	-0.952764	2.98044e-17
ENSG00000179044.14	1.05889e-15	-0.549628	2.97889e-17
ENSG00000118894.13	1.06851e-15	0.604467	3.00936e-17
ENSG00000148516.20	1.06973e-15	-0.663045	3.01465e-17
ENSG00000131355.13	1.07818e-15	-0.314557	3.04033e-17
ENSG00000148841.14	1.08525e-15	-0.684397	3.06213e-17
ENSG00000130768.13	1.0901e-15	0.861175	3.07771e-17
ENSG00000114491.12	1.12021e-15	0.564106	3.16465e-17
ENSG00000102359.5	1.18149e-15	0.988627	3.3398e-17
ENSG00000058799.12	1.18298e-15	0.575289	3.3481e-17
ENSG00000111452.11	1.18298e-15	-0.913797	3.34607e-17
ENSG00000132763.13	1.21844e-15	0.617678	3.45056e-17
ENSG00000135083.13	1.29427e-15	0.509393	3.66754e-17
ENSG00000114859.13	1.42744e-15	0.562617	4.04736e-17
ENSG00000122877.12	1.44051e-15	-0.842325	4.08691e-17
ENSG00000184730.9	1.45215e-15	-0.830635	4.12244e-17
ENSG00000153707.14	1.46377e-15	-0.549153	4.15795e-17
ENSG00000135912.9	1.46612e-15	0.558879	4.16717e-17
ENSG00000184428.11	1.51497e-15	0.555013	4.30863e-17
ENSG00000115419.11	1.57431e-15	-0.220687	4.48011e-17
ENSG00000139597.15	1.593e-15	-0.693901	4.5388e-17
ENSG00000172172.6	1.593e-15	0.633011	4.53786e-17
ENSG00000213626.10	1.59437e-15	-0.718422	4.54543e-17
ENSG00000166788.8	1.59735e-15	0.609948	4.55668e-17
ENSG00000112996.8	1.6891e-15	0.588753	4.82135e-17
ENSG00000164879.6	1.70659e-15	-0.558213	4.87421e-17
ENSG00000093009.8	1.79436e-15	0.624299	5.12798e-17
ENSG00000161692.16	1.80831e-15	0.59227	5.17097e-17
ENSG00000133316.14	1.83991e-15	0.51028	5.26451e-17
ENSG00000138193.13	1.84282e-15	-0.746016	5.27602e-17
ENSG00000128626.10	1.86471e-15	0.618692	5.34191e-17
ENSG00000119718.9	1.8754e-15	0.545541	5.37576e-17
ENSG00000166881.8	1.87876e-15	0.543799	5.38865e-17
ENSG00000127191.16	1.87941e-15	0.560748	5.39374e-17
ENSG00000198743.5	1.88536e-15	0.764454	5.41407e-17
ENSG00000141076.16	1.93628e-15	0.554475	5.56364e-17
ENSG00000159388.5	1.98868e-15	-1.03111	5.71762e-17
ENSG00000163686.12	1.99501e-15	-0.540314	5.73929e-17
ENSG00000100647.7	2.03263e-15	-0.581182	5.85102e-17
ENSG00000156697.11	2.04156e-15	0.495327	5.88025e-17
ENSG00000123989.12	2.10041e-15	0.642484	6.05605e-17
ENSG00000127249.13	2.10041e-15	-0.849485	6.05701e-17
ENSG00000090263.14	2.11854e-15	0.621796	6.11294e-17
ENSG00000104951.14	2.15635e-15	0.829019	6.22576e-17
ENSG00000167535.6	2.17268e-15	0.603485	6.27666e-17
ENSG00000101391.19	2.19898e-15	0.55476	6.35641e-17
ENSG00000060140.7	2.26856e-15	0.588785	6.56146e-17
ENSG00000171533.10	2.29191e-15	-0.679265	6.63296e-17
ENSG00000176945.15	2.30886e-15	0.959544	6.686e-17
ENSG00000080031.8	2.37913e-15	0.794393	6.89359e-17
ENSG00000125398.5	2.41247e-15	0.431174	6.99632e-17
ENSG00000173786.15	2.41247e-15	0.545794	6.99853e-17
ENSG00000064886.12	2.42694e-15	-1.03051	7.04467e-17
ENSG00000116649.8	2.45827e-15	0.590844	7.13986e-17
ENSG00000106771.11	2.46013e-15	-0.515634	7.14951e-17
ENSG00000122861.14	2.46953e-15	1.10325	7.18108e-17
ENSG00000110583.11	2.55109e-15	0.570093	7.42706e-17
ENSG00000138356.12	2.55109e-15	-0.809504	7.42276e-17
ENSG00000167642.11	2.55593e-15	0.643339	7.44557e-17
ENSG00000140030.5	2.59312e-15	-0.565722	7.56133e-17
ENSG00000174282.10	2.59312e-15	-0.53271	7.56286e-17
ENSG00000132470.12	2.70327e-15	0.826042	7.88876e-17
ENSG00000114021.10	2.76694e-15	0.593981	8.07936e-17
ENSG00000173930.8	2.86397e-15	-0.821765	8.36761e-17
ENSG00000149541.8	3.03827e-15	0.551117	8.8821e-17
ENSG00000169291.8	3.0683e-15	-0.765848	8.97519e-17
ENSG00000124786.9	3.06913e-15	0.516015	8.98293e-17
ENSG00000196159.10	3.13368e-15	-0.807192	9.17727e-17
ENSG00000135773.11	3.14377e-15	-0.395121	9.21225e-17
ENSG00000157368.9	3.15172e-15	-0.492539	9.24097e-17
ENSG00000087299.10	3.23285e-15	0.617551	9.48442e-17
ENSG00000150990.6	3.26715e-15	0.530588	9.59068e-17
ENSG00000171224.8	3.37533e-15	0.658546	9.91409e-17
ENSG00000187097.11	3.38064e-15	0.500935	9.93552e-17
ENSG00000146143.16	3.38982e-15	0.548107	9.96833e-17
ENSG00000205629.10	3.41495e-15	0.551022	1.00481e-16
ENSG00000215788.8	3.42205e-15	0.77681	1.00749e-16
ENSG00000182446.12	3.55563e-15	0.607065	1.04743e-16
ENSG00000204392.9	3.58749e-15	0.630635	1.05744e-16
ENSG00000050555.16	3.66898e-15	-0.89406	1.08209e-16
ENSG00000116455.12	3.76265e-15	0.534326	1.11037e-16
ENSG00000158186.11	3.87332e-15	-0.638365	1.14369e-16
ENSG00000184164.13	3.94032e-15	0.625503	1.16416e-16
ENSG00000024526.15	3.95499e-15	0.611215	1.17057e-16
ENSG00000162654.8	3.95499e-15	-0.888199	1.17122e-16
ENSG00000187134.11	3.95499e-15	0.0558847	1.17085e-16
ENSG00000253755.1	3.95499e-15	1.27394	1.1705e-16
ENSG00000123838.9	4.08827e-15	-1.47138	1.2114e-16
ENSG00000198915.10	4.19283e-15	0.702804	1.2431e-16
ENSG00000155465.17	4.20259e-15	-0.727641	1.24672e-16
ENSG00000139174.9	4.2316e-15	-0.608585	1.25606e-16
ENSG00000114354.11	4.29694e-15	0.567971	1.27619e-16
ENSG00000135845.8	4.42804e-15	0.585015	1.3159e-16
ENSG00000214708.4	4.45768e-15	-0.435577	1.32547e-16
ENSG00000134910.11	4.46056e-15	0.559449	1.3271e-16
ENSG00000126768.11	4.48071e-15	0.588246	1.33464e-16
ENSG00000160111.11	4.48071e-15	-0.961381	1.33425e-16
ENSG00000259974.2	4.4848e-15	-0.796325	1.33663e-16
ENSG00000196205.8	4.50761e-15	-0.936987	1.34421e-16
ENSG00000103202.11	4.57644e-15	0.685284	1.36552e-16
ENSG00000173641.16	4.59143e-15	-0.576176	1.37079e-16
ENSG00000128567.15	4.90856e-15	-0.647077	1.46632e-16
ENSG00000110422.10	4.94029e-15	-0.523238	1.47665e-16
ENSG00000145545.10	4.94251e-15	0.684017	1.47816e-16
ENSG00000164197.10	4.95143e-15	-0.53157	1.48169e-16
ENSG00000111581.8	4.97263e-15	0.588246	1.48889e-16
ENSG00000131788.14	5.01356e-15	0.578014	1.50201e-16
ENSG00000146842.15	5.19443e-15	0.565468	1.55709e-16
ENSG00000012174.10	5.27891e-15	0.513892	1.58333e-16
ENSG00000179958.7	5.29816e-15	0.631269	1.59001e-16
ENSG00000065457.9	5.39749e-15	0.485981	1.62076e-16
ENSG00000125247.14	5.40193e-15	0.58755	1.62302e-16
ENSG00000146376.9	5.40967e-15	-0.553208	1.62628e-16
ENSG00000102265.10	5.42395e-15	0.882655	1.63151e-16
ENSG00000108010.10	5.55676e-15	0.470078	1.67242e-16
ENSG00000151892.13	5.69885e-15	-0.608332	1.71617e-16
ENSG00000027697.11	5.81285e-15	-0.60076	1.7515e-16
ENSG00000111726.11	5.8197e-15	0.602598	1.75457e-16
ENSG00000079156.15	5.83412e-15	-0.688104	1.75992e-16
ENSG00000163214.19	5.83839e-15	0.551022	1.76222e-16
ENSG00000169504.13	6.08757e-15	-0.579629	1.83848e-16
ENSG00000104517.11	6.10314e-15	0.607603	1.84424e-16
ENSG00000140600.15	6.12655e-15	-0.269317	1.85237e-16
ENSG00000166012.13	6.16927e-15	0.548836	1.86635e-16
ENSG00000081041.8	6.1984e-15	-1.30027	1.87623e-16
ENSG00000124383.7	6.19913e-15	0.496024	1.87752e-16
ENSG00000181744.7	6.28158e-15	-0.628766	1.90358e-16
ENSG00000130699.15	6.28971e-15	0.521749	1.90712e-16
ENSG00000162174.11	6.38755e-15	-0.0844923	1.93789e-16
ENSG00000187908.14	6.54319e-15	-1.84084	1.98624e-16
ENSG00000116670.13	6.55806e-15	0.545794	1.99189e-16
ENSG00000075461.5	6.56455e-15	-0.764169	1.99612e-16
ENSG00000264538.5	6.56455e-15	0.56249	1.996e-16
ENSG00000118193.10	6.58621e-15	0.592523	2.00385e-16
ENSG00000254415.3	6.74657e-15	-0.551497	2.0538e-16
ENSG00000114270.14	6.76012e-15	0.930334	2.05909e-16
ENSG00000114166.7	6.99853e-15	-0.6294	2.13292e-16
ENSG00000111879.17	7.12421e-15	-0.748836	2.17245e-16
ENSG00000132603.12	7.12544e-15	0.582291	2.17406e-16
ENSG00000128594.6	7.45466e-15	-0.563124	2.27579e-16
ENSG00000260461.1	7.63116e-15	-0.538413	2.33099e-16
ENSG00000187531.12	7.78645e-15	0.537938	2.37977e-16
ENSG00000137274.11	7.80669e-15	0.636813	2.3873e-16
ENSG00000070182.16	8.01608e-15	1.00935	2.45272e-16
ENSG00000197982.13	8.23745e-15	0.604847	2.52187e-16
ENSG00000130176.6	8.2808e-15	-0.824616	2.53657e-16
ENSG00000163170.10	8.30967e-15	0.629115	2.54685e-16
ENSG00000159377.9	8.42324e-15	0.592333	2.58311e-16
ENSG00000105388.13	8.48659e-15	1.94842	2.604e-16
ENSG00000133835.13	8.50433e-15	-0.48785	2.61091e-16
ENSG00000159593.13	8.53806e-15	0.524442	2.62274e-16
ENSG00000130935.8	8.61185e-15	0.421733	2.6469e-16
ENSG00000206052.9	8.67605e-15	-0.481578	2.66813e-16
ENSG00000131016.15	9.08006e-15	-1.00019	2.79394e-16
ENSG00000146674.13	9.16315e-15	1.10417	2.82109e-16
ENSG00000124120.9	9.35856e-15	0.495454	2.88286e-16
ENSG00000187098.13	9.66424e-15	-0.709362	2.97869e-16
ENSG00000183309.10	9.7338e-15	0.572184	3.00181e-16
ENSG00000121578.11	9.76751e-15	0.558752	3.01389e-16
ENSG00000171302.15	9.81366e-15	0.543925	3.02983e-16
ENSG00000148339.11	9.8866e-15	-0.729352	3.05576e-16
ENSG00000171729.12	9.8866e-15	0.457817	3.0542e-16
ENSG00000153446.14	1.00632e-14	-0.832916	3.11207e-16
ENSG00000134815.17	1.00682e-14	0.570854	3.11537e-16
ENSG00000196329.9	1.03599e-14	-0.397687	3.20742e-16
ENSG00000101333.15	1.04828e-14	-0.433011	3.24727e-16
ENSG00000082397.14	1.0654e-14	-0.627911	3.30215e-16
ENSG00000112651.10	1.06557e-14	0.538318	3.30449e-16
ENSG00000129244.7	1.08827e-14	-0.382607	3.37677e-16
ENSG00000155330.8	1.08976e-14	0.545763	3.38327e-16
ENSG00000146223.13	1.10827e-14	0.519499	3.44268e-16
ENSG00000136522.12	1.10829e-14	0.549279	3.44465e-16
ENSG00000110172.10	1.1239e-14	0.5048	3.49511e-16
ENSG00000235385.1	1.12747e-14	-0.29387	3.50814e-16
ENSG00000160917.13	1.12938e-14	0.592523	3.51603e-16
ENSG00000157214.12	1.1306e-14	0.672169	3.52177e-16
ENSG00000100726.13	1.1421e-14	0.542405	3.55958e-16
ENSG00000111339.9	1.14823e-14	-0.344844	3.58263e-16
ENSG00000147113.15	1.14823e-14	-0.761318	3.58107e-16
ENSG00000066027.10	1.17409e-14	-0.571202	3.66535e-16
ENSG00000083857.12	1.23354e-14	0.734579	3.85308e-16
ENSG00000097046.11	1.24395e-14	0.601489	3.88775e-16
ENSG00000109107.12	1.24606e-14	0.345794	3.89648e-16
ENSG00000185624.13	1.26496e-14	0.382417	3.95777e-16
ENSG00000127334.10	1.26829e-14	0.590749	3.97038e-16
ENSG00000125538.10	1.27102e-14	-0.626422	3.98112e-16
ENSG00000187391.16	1.29067e-14	-0.534199	4.0449e-16
ENSG00000178878.11	1.3573e-14	-0.761983	4.25607e-16
ENSG00000163531.14	1.36213e-14	-0.739965	4.27355e-16
ENSG00000136630.12	1.37334e-14	-0.642642	4.31108e-16
ENSG00000186665.8	1.38493e-14	0.620402	4.34987e-16
ENSG00000153944.9	1.39304e-14	0.574751	4.37775e-16
ENSG00000124942.12	1.39537e-14	-5.12885	4.38748e-16
ENSG00000162747.8	1.41827e-14	-0.509108	4.46191e-16
ENSG00000104341.15	1.43409e-14	0.79246	4.51418e-16
ENSG00000150967.16	1.43653e-14	0.575574	4.52432e-16
ENSG00000118515.10	1.44995e-14	-0.910819	4.56911e-16
ENSG00000162390.16	1.46583e-14	0.555013	4.62166e-16
ENSG00000164111.13	1.47563e-14	-0.525107	4.6551e-16
ENSG00000182489.8	1.47636e-14	0.75514	4.65996e-16
ENSG00000155324.8	1.49731e-14	0.569713	4.72868e-16
ENSG00000146386.7	1.54466e-14	0.595375	4.88087e-16
ENSG00000162493.15	1.5735e-14	-0.740694	4.97472e-16
ENSG00000076604.13	1.61231e-14	0.598891	5.10022e-16
ENSG00000069667.14	1.62557e-14	-0.675368	5.14495e-16
ENSG00000026652.12	1.64487e-14	-0.49745	5.2117e-16
ENSG00000198131.12	1.64487e-14	0.49745	5.2117e-16
ENSG00000123136.13	1.70683e-14	0.60792	5.41097e-16
ENSG00000160179.17	1.718e-14	-0.694757	5.44934e-16
ENSG00000184905.7	1.72376e-14	-0.327895	5.4706e-16
ENSG00000163106.9	1.7372e-14	-0.517725	5.51626e-16
ENSG00000112742.8	1.74245e-14	0.583178	5.53593e-16
ENSG00000144815.13	1.74282e-14	-0.635736	5.54011e-16
ENSG00000260804.3	1.78512e-14	-0.498273	5.67765e-16
ENSG00000278619.3	1.84005e-14	0.573578	5.85554e-16
ENSG00000129993.13	1.8403e-14	-0.531696	5.8595e-16
ENSG00000115541.9	1.84494e-14	0.604277	5.87748e-16
ENSG00000143248.11	1.89698e-14	-0.762617	6.04655e-16
ENSG00000010244.15	1.90984e-14	0.51047	6.0941e-16
ENSG00000176014.11	1.90984e-14	-0.748361	6.09109e-16
ENSG00000112029.8	1.93809e-14	0.534326	6.18761e-16
ENSG00000101181.16	1.97716e-14	0.562237	6.31574e-16
ENSG00000119326.13	1.98178e-14	-0.604023	6.33394e-16
ENSG00000231389.6	2.00377e-14	-2.93303	6.40765e-16
ENSG00000189221.8	2.02645e-14	-0.735593	6.48368e-16
ENSG00000105655.17	2.04255e-14	0.625281	6.53872e-16
ENSG00000104964.13	2.06482e-14	-0.634754	6.61357e-16
ENSG00000122882.9	2.21724e-14	0.544527	7.10561e-16
ENSG00000107438.7	2.23654e-14	-0.606019	7.17133e-16
ENSG00000136243.15	2.25551e-14	0.506669	7.23604e-16
ENSG00000136295.13	2.2877e-14	0.751529	7.34324e-16
ENSG00000013573.15	2.36154e-14	0.71668	7.58434e-16
ENSG00000108883.11	2.36596e-14	0.556376	7.60262e-16
ENSG00000140450.8	2.39377e-14	-0.666783	7.69612e-16
ENSG00000124831.17	2.45765e-14	-0.477174	7.90572e-16
ENSG00000132698.12	2.46144e-14	0.57022	7.92217e-16
ENSG00000108946.13	2.4697e-14	-0.498305	7.95302e-16
ENSG00000145569.5	2.51761e-14	-0.777222	8.11165e-16
ENSG00000030110.11	2.59597e-14	0.565595	8.36859e-16
ENSG00000166347.17	2.59675e-14	-0.816632	8.37559e-16
ENSG00000011600.10	2.62726e-14	-0.857437	8.47854e-16
ENSG00000165055.14	2.64227e-14	0.493458	8.53155e-16
ENSG00000126953.5	2.67691e-14	0.482243	8.64802e-16
ENSG00000108256.7	2.72012e-14	0.621416	8.7923e-16
ENSG00000099364.15	2.72354e-14	0.635166	8.80806e-16
ENSG00000103245.12	2.72711e-14	0.495327	8.82429e-16
ENSG00000197299.9	2.74139e-14	0.536449	8.87524e-16
ENSG00000164929.15	2.7973e-14	-0.377285	9.06107e-16
ENSG00000117020.15	2.83441e-14	-0.651703	9.18618e-16
ENSG00000167552.12	2.84279e-14	-0.737114	9.21826e-16
ENSG00000147140.14	2.87274e-14	0.491589	9.32032e-16
ENSG00000198722.11	2.87577e-14	-0.630667	9.3351e-16
ENSG00000105849.5	2.90359e-14	0.482243	9.43043e-16
ENSG00000100902.9	2.92387e-14	0.63374	9.50134e-16
ENSG00000089225.18	2.9338e-14	-0.676287	9.53868e-16
ENSG00000140044.11	2.95943e-14	-0.604879	9.62712e-16
ENSG00000103550.12	3.00583e-14	0.514304	9.78325e-16
ENSG00000106636.6	3.04416e-14	0.581055	9.91326e-16
ENSG00000180900.15	3.09821e-14	0.640266	1.00946e-15
ENSG00000186407.6	3.15987e-14	-0.511484	1.0301e-15
ENSG00000109686.15	3.16233e-14	-0.524188	1.03144e-15
ENSG00000182054.8	3.22853e-14	0.6294	1.05359e-15
ENSG00000222041.9	3.24148e-14	0.69916	1.05838e-15
ENSG00000149679.10	3.29829e-14	0.688801	1.0775e-15
ENSG00000164099.3	3.30955e-14	-0.679297	1.08175e-15
ENSG00000136108.13	3.3209e-14	0.559766	1.0866e-15
ENSG00000167196.12	3.3209e-14	0.495454	1.08645e-15
ENSG00000082512.13	3.51967e-14	0.682148	1.15225e-15
ENSG00000020922.11	3.53068e-14	0.5099	1.15646e-15
ENSG00000159352.14	3.59429e-14	0.586884	1.17792e-15
ENSG00000128228.4	3.73391e-14	0.585173	1.22432e-15
ENSG00000166508.16	3.74885e-14	0.619198	1.22986e-15
ENSG00000085063.13	3.79197e-14	-0.589545	1.24466e-15
ENSG00000110876.9	3.80895e-14	-0.705338	1.2509e-15
ENSG00000126249.6	3.80997e-14	0.53271	1.25189e-15
ENSG00000106086.17	3.85637e-14	0.568383	1.2678e-15
ENSG00000112578.8	3.89479e-14	0.618216	1.2811e-15
ENSG00000162545.5	3.98434e-14	-0.715032	1.31124e-15
ENSG00000143641.9	3.99189e-14	0.59924	1.31442e-15
ENSG00000149257.12	4.08174e-14	0.698749	1.34471e-15
ENSG00000130821.14	4.15724e-14	0.735973	1.3703e-15
ENSG00000115756.11	4.18429e-14	-0.649327	1.37994e-15
ENSG00000171453.16	4.21818e-14	0.508284	1.39184e-15
ENSG00000101294.15	4.22311e-14	0.521559	1.3942e-15
ENSG00000149256.13	4.34775e-14	0.778172	1.4361e-15
ENSG00000114771.12	4.43629e-14	-0.483574	1.46611e-15
ENSG00000262406.2	4.48769e-14	1.03875	1.48387e-15
ENSG00000187837.3	4.499e-14	0.696816	1.48838e-15
ENSG00000126458.3	4.50923e-14	-0.691779	1.49255e-15
ENSG00000170561.11	4.56562e-14	-0.793632	1.512e-15
ENSG00000079102.15	4.69268e-14	-0.533059	1.55488e-15
ENSG00000169891.16	4.85835e-14	-0.697798	1.61062e-15
ENSG00000166526.15	4.88799e-14	0.572438	1.62129e-15
ENSG00000146166.15	4.89066e-14	0.861429	1.62302e-15
ENSG00000124171.7	4.97043e-14	-0.658166	1.65035e-15
ENSG00000188483.7	4.97224e-14	0.752257	1.65181e-15
ENSG00000133687.14	4.99994e-14	-0.777253	1.66187e-15
ENSG00000157557.10	5.01129e-14	-0.863013	1.66651e-15
ENSG00000163884.3	5.12565e-14	-0.664312	1.70543e-15
ENSG00000165175.14	5.12802e-14	-0.661777	1.7071e-15
ENSG00000138346.13	5.26377e-14	0.538318	1.7532e-15
ENSG00000143258.14	5.29232e-14	0.561603	1.76453e-15
ENSG00000197451.9	5.29232e-14	0.580041	1.76376e-15
ENSG00000120057.4	5.42118e-14	-0.418375	1.80843e-15
ENSG00000149262.15	5.42332e-14	0.478631	1.81083e-15
ENSG00000165168.7	5.42332e-14	-0.976493	1.81102e-15
ENSG00000111684.9	5.49327e-14	-0.630255	1.83533e-15
ENSG00000129048.6	5.49485e-14	-0.305211	1.8368e-15
ENSG00000173611.16	5.57115e-14	-0.620624	1.86327e-15
ENSG00000243244.4	5.62715e-14	-0.542436	1.88297e-15
ENSG00000062822.11	5.63038e-14	0.520988	1.88502e-15
ENSG00000049245.11	5.65139e-14	-0.459813	1.89303e-15
ENSG00000157077.13	5.73415e-14	-0.626517	1.92174e-15
ENSG00000139629.14	5.78275e-14	0.78191	1.93903e-15
ENSG00000163156.10	5.79889e-14	0.568098	1.94544e-15
ENSG00000161981.9	5.85751e-14	0.560748	1.96612e-15
ENSG00000235387.1	5.91732e-14	-0.237288	1.98721e-15
ENSG00000165633.11	5.97012e-14	-0.73667	2.00598e-15
ENSG00000244405.6	6.09645e-14	-0.616632	2.04947e-15
ENSG00000164078.11	6.10729e-14	0.608332	2.05417e-15
ENSG00000162298.15	6.20175e-14	0.534453	2.08702e-15
ENSG00000143845.13	6.33854e-14	0.679613	2.13414e-15
ENSG00000101255.9	6.39661e-14	0.677269	2.15479e-15
ENSG00000112699.9	6.53697e-14	0.578077	2.20321e-15
ENSG00000130826.14	6.70771e-14	0.497481	2.26191e-15
ENSG00000035862.11	6.76746e-14	-0.610581	2.28323e-15
ENSG00000258545.4	6.81215e-14	-0.441692	2.29948e-15
ENSG00000163993.6	6.81567e-14	1.63884	2.30185e-15
ENSG00000184678.9	6.85899e-14	0.392523	2.31766e-15
ENSG00000073605.17	6.90735e-14	0.812894	2.33519e-15
ENSG00000164265.7	6.93013e-14	-1.76521	2.34409e-15
ENSG00000174938.13	6.94223e-14	0.700998	2.34938e-15
ENSG00000160813.5	6.94822e-14	0.705116	2.3526e-15
ENSG00000122035.6	7.009e-14	-0.416569	2.37439e-15
ENSG00000153044.8	7.10849e-14	0.500935	2.40933e-15
ENSG00000111110.10	7.38844e-14	0.488611	2.50549e-15
ENSG00000132329.9	7.46566e-14	0.933281	2.53296e-15
ENSG00000138363.13	7.75198e-14	0.53534	2.63144e-15
ENSG00000174371.15	7.88403e-14	0.560748	2.67763e-15
ENSG00000138801.7	7.89141e-14	-0.442927	2.68149e-15
ENSG00000166278.13	7.9078e-14	-0.789387	2.68843e-15
ENSG00000001626.13	8.03434e-14	-0.889561	2.73283e-15
ENSG00000120594.15	8.26604e-14	-0.632885	2.81307e-15
ENSG00000118680.11	8.37559e-14	-0.491589	2.8518e-15
ENSG00000108176.13	8.58821e-14	0.912023	2.92568e-15
ENSG00000021645.16	8.6666e-14	-0.407952	2.95388e-15
ENSG00000115604.9	8.69127e-14	-0.598479	2.96379e-15
ENSG00000141101.11	8.8667e-14	0.545383	3.02514e-15
ENSG00000073910.18	9.02331e-14	-0.640393	3.08013e-15
ENSG00000129657.13	9.34156e-14	-0.58964	3.19038e-15
ENSG00000174607.9	9.50724e-14	0.760494	3.2486e-15
ENSG00000203883.6	9.5074e-14	-0.682623	3.25029e-15
ENSG00000173272.12	9.6037e-14	0.629558	3.28487e-15
ENSG00000106603.16	9.64576e-14	0.521812	3.30092e-15
ENSG00000134333.12	9.66976e-14	0.641312	3.31081e-15
ENSG00000101444.11	9.74879e-14	0.617044	3.33955e-15
ENSG00000116497.16	9.83366e-14	0.522858	3.37032e-15
ENSG00000164266.9	9.89805e-14	1.50429	3.3941e-15
ENSG00000197253.12	9.91024e-14	-0.957611	3.39999e-15
ENSG00000136048.12	9.96527e-14	-0.795058	3.42058e-15
ENSG00000124440.14	1.0687e-13	-0.76192	3.67016e-15
ENSG00000124571.16	1.08565e-13	0.462981	3.73026e-15
ENSG00000097096.8	1.10274e-13	-0.507144	3.79088e-15
ENSG00000159189.10	1.11008e-13	-0.900523	3.81801e-15
ENSG00000172663.7	1.12341e-13	0.535181	3.8658e-15
ENSG00000204315.3	1.12703e-13	0.49707	3.88022e-15
ENSG00000160013.7	1.13252e-13	-0.525202	3.90106e-15
ENSG00000231500.5	1.13301e-13	0.212672	3.90472e-15
ENSG00000158966.12	1.13659e-13	-0.781784	3.91901e-15
ENSG00000066336.10	1.13965e-13	-0.797814	3.93152e-15
[truncated: 7,966 more rows]
